# Supplementary material for: Whole exome sequencing for identification of specific gene mutations in an Indian cohort of triple- negative breast cancer patients
Source: Research Square preprint supplement (doi:10.21203/rs.3.rs-4187336/v1), 2024-04-18
Supplement: Supplementary file 1 [file 0036f85bec4b8d82d7e2cfe8.docx]

**Supplementary Table 2: Analysis of the target coverage in 15 triple negative breast carcinomas (TNBC) and 5 adjacent non-cancerous tissues (ANCT) samples after whole exome sequencing**

| **Sample ID** | **Target coverage (1X)** | **Target coverage (2X)** | **Target coverage (10X)** | **Target coverage (20X)** | **Target coverage (30X)** | **Capture Region** | **RNA Baits** |
| --- | --- | --- | --- | --- | --- | --- | --- |
| UPID01 | 99.59 | 99.45 | 98.01 | 95.28 | 91.42 | Whole exome | Agilent Sure Select |
| UPID02 | 99.71 | 99.66 | 98.59 | 94.87 | 87.25 | Whole exome | Agilent Sure Select |
| UPID03 | 87.28 | 99.45 | 85.92 | 83.50 | 79.96 | Whole exome | Agilent Sure Select |
| UPID04 | 99.57 | 99.42 | 97.75 | 94.54 | 90.02 | Whole exome | Agilent Sure Select |
| UPID05 | 99.57 | 99.39 | 97.56 | 94.04 | 89.02 | Whole exome | Agilent Sure Select |
| UPID06 | 99.54 | 99.37 | 97.47 | 93.61 | 88.09 | Whole exome | Agilent Sure Select |
| UPID07 | 99.59 | 99.44 | 97.90 | 94.80 | 90.43 | Whole exome | Agilent Sure Select |
| UPID08 | 99.54 | 99.33 | 97.27 | 93.65 | 88.89 | Whole exome | Agilent Sure Select |
| UPID09 | 99.42 | 99.13 | 96.09 | 90.72 | 83.88 | Whole exome | Agilent Sure Select |
| UPID10 | 99.27 | 98.84 | 94.81 | 88.21 | 80.09 | Whole exome | Agilent Sure Select |
| UPID11 | 99.51 | 99.30 | 96.99 | 92.60 | 86.73 | Whole exome | Agilent Sure Select |
| UPID12 | 99.52 | 99.33 | 97.18 | 92.98 | 87.32 | Whole exome | Agilent Sure Select |
| UPID13 | 99.57 | 99.40 | 97.66 | 94.24 | 89.55 | Whole exome | Agilent Sure Select |
| UPID14 | 99.58 | 99.42 | 97.74 | 94.84 | 90.97 | Whole exome | Agilent Sure Select |
| UPID15 | 99.45 | 99.16 | 96.10 | 90.57 | 83.48 | Whole exome | Agilent Sure Select |
| UPID16 | 99.71 | 99.655 | 98.41 | 92.96 | 80.89 | Whole exome | Agilent Sure Select |
| UPID17 | 99.58 | 99.428 | 97.82 | 95.07 | 91.49 | Whole exome | Agilent Sure Select |
| UPID18 | 99.60 | 99.447 | 97.92 | 95.13 | 91.27 | Whole exome | Agilent Sure Select |
| UPID19 | 99.59 | 99.461 | 98.19 | 96.21 | 93.73 | Whole exome | Agilent Sure Select |
| UPID20 | 99.68 | 99.567 | 95.92 | 80.59 | 65.45 | Whole exome | Agilent Sure Select |

**Note:** TNBC samples belongs to UPID01 to UPID15; ANCT samples belongs to UPID16 to UPID20
