# Supplementary material for: Whole exome sequencing for identification of specific gene mutations in an Indian cohort of triple- negative breast cancer patients
Source: Research Square preprint supplement (doi:10.21203/rs.3.rs-4187336/v1), 2024-04-18
Supplement: Supplementary file 2 [file 14281cf9a87c44cc23ccc205.docx]

**Supplemental Table 4: Summary of germline mutations in triple-negative breast cancer**

| **Annotated Gene** | **Mutation Type** | **Position** | **Amino Acid Change** | **Allele Change** | **RefSeq** | **Tumor Type** | **Sample ID** |
| --- | --- | --- | --- | --- | --- | --- | --- |
| BIN1 | Missense | chr2:127819718 | p.N222S | T>C | NM_001320634 | TNBC | UPID04 |
| TP53 | Missense | chr17:7578406 | p.R136H | C>T | NM_001276760 | TNBC | UPID09 |
| LIAS | Splice site | chr4:39469267 | c.737+1G>A | G>A | NM_006859 | TNBC | UPID09 |
| MLH1 | Missense | chr3:37035074 | p.D12E | C>G | NM_001258271 | TNBC | UPID02 |
| TP53 | Missense | chr17:7577106 | p.P239S | G>A | NM_001276760 | TNBC | UPID07 |
| BIN1 | Frameshift | chr2:127808059 | p.E330Sfs*12 | C>- | NM_001320634 | TNBC | UPID07 |
| TP53 | Missense | chr17:7577524 | p.T214P | T>G | NM_001276760 | TNBC | UPID12 |
| PIK3CA | Missense | chr3:178936082 | p.E542K | G>A | NM_006218 | TNBC | UPID13 |
| APC | Missense | chr5:112173699 | p.T785I | C>T | NM_001127511 | TNBC | UPID14 |
| GPSM2 | Splice site | chr1:109466620 | c.1601-2A>G | A>G | NM_013296 | TNBC | UPID15 |
