# Supplementary material for: Whole exome sequencing for identification of specific gene mutations in an Indian cohort of triple- negative breast cancer patients
Source: Research Square preprint supplement (doi:10.21203/rs.3.rs-4187336/v1), 2024-04-18
Supplement: Supplementary file 3 [file 3d7d9f8260ef290d2d4cf63a.docx]

**Supplementary Table 1:** Pathological and clinical details of the patients with TNBC used for the whole exome sequencing (WES)

| **Variables** | **N=15** |
| --- | --- |
| **Age at enrolment** | |
| Mean age at enrolment (SD), range | 45 (±) (28-64) |
| Median age | 47 |
| **Education, n(%)** | |
| Illiterate | 4 (26.7%) |
| <high school | 3 (20%) |
| College | 4 (26.7%) |
| College and higher | 4 (26.7%) |
| **Occupation, n(%)** | |
| Agriculture | - |
| Home maker | 13 (86.7%) |
| Office | 1 (6.7%) |
| Other | 1 (6.7%) |
| **Place of residence, n(%)** | |
| Urban | 14 (93.3%) |
| Rural | 1 (6.7%) |
| **Diet, n(%)** | |
| Vegetarian | 3 (20%) |
| Non-vegetarian | 12 (86%) |
| **Red meat consumption, n(%)** | |
| Yes | 9 (60%) |
| No | 6 (40%) |
| **Alcohol use, n(%)** | |
| Yes | - |
| No | 15 (100%) |
| **Tobacco use, n(%)** | |
| Yes | 1 (6.7%) |
| No | 14 (93.3%) |
| **Passive smoke exposure from partner, n(%)** | |
| Yes | 9 (60%) |
| No | 6 (40%) |
| **Menarche, n(%)** | |
| Mean (Sd), range | 14.4 (±21.31) (12-18) |
| **First child birth, n(%)** |  |
| Mean (SD), range | 21.80 (±4.29) (25-29) |
| Median | 22 |
| **Parity, n(%)** | |
| Nulliparous | - |
| Uniparous | 1 (6.7%) |
| Multiparous | 14 (93.3%) |
| **Menopausal status, n(%)** | |
| Pre | 9 (60%) |
| Post | 6 (40%) |
| **Family history of cancer, n(%)** | |
| Present | - |
| Absent | 15 (100%) |
| **Surgical history, n(%)** | |
| Yes | 3 (20%) |
| No | 12 (80%) |
| **Lymph Node involvement, n(%)** | |
| No | - |
| N1 | 7 (46.7%) |
| N2 | 6 (40%) |
| N3 | 2 (13.3%) |
| **Stage, n(%)** | |
| Stage I | - |
| Stage II | - |
| Stage III | 10 (66.7%) |
| Stage IV | 5 (33.3%) |
| **Grade, n(%)** | |
| Grade I | - |
| Grade II | 3 (20%) |
| Grade III | 12 (80%) |
| **Metastasis, n(%)** | |
| Yes | 5 (33.3%) |
| No | 10 (66.7%) |
