# Supplementary material for: Whole exome sequencing for identification of specific gene mutations in an Indian cohort of triple- negative breast cancer patients
Source: Research Square preprint supplement (doi:10.21203/rs.3.rs-4187336/v1), 2024-04-18
Supplement: Supplementary file 4 [file 5a243cbc6aa86ce68ac8d610.docx]

**Supplemental Table 3: Summary of somatic mutations in triple-negative breast cancer**

| **Annotated Gene** | **Mutation Type** | **Position** | **Amino Acid Change** | **Allele Change** | **RefSeq** | **Tumor Type** | **Sample ID** |
| --- | --- | --- | --- | --- | --- | --- | --- |
| IFI16 | Missense | chr1:158984564 | p.D32N | G>A | NM_001206567 | TNBC | UPID01 |
| PCSK9 | Missense | chr1:55523180 | p.H391Q | C>G | NM_174936 | TNBC | UPID01 |
| PRTFDC1 | Missense | chr10:25147325 | p.V140A | A>G | NM_001282786 | TNBC | UPID01 |
| PI4K2A | Missense | chr10:99416072 | p.Y223H | T>C | NM_018425 | TNBC | UPID01 |
| FOXN4 | Missense | chr12:109725239 | p.H187Y | G>A | NM_213596 | TNBC | UPID01 |
| FAM186A | Missense | chr12:50748847 | p.S590G | T>C | NM_001145475 | TNBC | UPID01 |
| SLC7A8 | Missense | chr14:23612372 | p.T79P | T>G | NM_001267036 | TNBC | UPID01 |
| TTLL5 | Missense | chr14:76330033 | p.A1117V | C>T | NM_015072 | TNBC | UPID01 |
| BRCA1 | Missense | chr17:41215921 | p.A1661T | C>T | NM_007297 | TNBC | UPID01 |
| SPAG9 | Nonsense | chr17:49084676 | p.E252* | C>A | NM_001251971 | TNBC | UPID01 |
| ST6GALNAC2 | Missense | chr17:74570620 | p.G63D | C>T | NM_006456 | TNBC | UPID01 |
| DNAH2 | Missense | chr17:7721695 | p.I3485V | A>G | NM_020877 | TNBC | UPID01 |
| NCL | Splice site | chr2:232326730 | c.136-2insGAAGATAGTGAAGATGAGGAAATGTCAGAAGATGAAGAAGATGATAGCAGTGGAGAAG | insCTTCTCCACTGCTATCATCTTCTTCATCTTCTGACATTTCCTCATCTTCACTATCTTC | NM_005381 | TNBC | UPID01 |
| BPIFB3 | Missense | chr20:31644362 | p.L47V | C>G | NM_182658 | TNBC | UPID01 |
| XPC | Nonsense | chr3:14200134 | p.G417* | G>A | NM_004628 | TNBC | UPID01 |
| MUC4 | Missense | chr3:195513040 | p.G1804D | C>T | NM_018406 | TNBC | UPID01 |
| LARP1B | Missense | chr4:128999039 | p.N47D | A>G | NM_001278604 | TNBC | UPID01 |
| HENMT1 | Missense | chr1:109192889 | p.G234R | C>T | NM_001102592 | TNBC | UPID02 |
| FNDC7 | Missense | chr1:109276071 | p.C686Y | G>A | NM_001144937 | TNBC | UPID02 |
| PSRC1 | Splice site | chr1:109823874 | c.520-1insTAGGAAGGGGTCAGTCAGGGCTCTCCGGGCTACATCTGGAAAGAGGCCCTCCAACATGAAGAG | insCTCTTCATGTTGGAGGGCCTCTTTCCAGATGTAGCCCGGAGAGCCCTGACTGACCCCTTCCTA | NM_001350242 | TNBC | UPID02 |
| C1orf167 | Missense | chr1:11844368 | p.A1048V | C>T | NM_001010881 | TNBC | UPID02 |
| HMGCS2 | Splice site | chr1:120295901 | c.1168+2T>C | A>G | NM_001166107 | TNBC | UPID02 |
| ATAD3B | Frameshift | chr1:1425954 | p.L460Rfs*16 | delT | NM_001317238 | TNBC | UPID02 |
| SPEN | Missense | chr1:16258476 | p.H1914R | A>G | NM_015001 | TNBC | UPID02 |
| NADK | Missense | chr1:1687740 | p.L149P | A>G | NM_001198995 | TNBC | UPID02 |
| CRB1 | Missense | chr1:197411322 | p.A1190V | C>T | NM_001193640 | TNBC | UPID02 |
| IPO9 | Missense | chr1:201835957 | p.F575L | C>G | NM_018085 | TNBC | UPID02 |
| C4BPB | Missense | chr1:207263700 | p.A36T | G>A | NM_000716 | TNBC | UPID02 |
| STUM | Missense | chr1:226736652 | p.A16V | C>T | NM_001003665 | TNBC | UPID02 |
| CDC42BPA | Missense | chr1:227400861 | p.K110N | T>G | NM_001366010 | TNBC | UPID02 |
| ADPRS | Missense | chr1:36557653 | p.E220G | A>G | NM_017825 | TNBC | UPID02 |
| SF3A3 | Missense | chr1:38455552 | p.K29R | T>C | NM_001320830 | TNBC | UPID02 |
| ACOT7 | Missense | chr1:6453342 | p.R40G | T>C | NM_007274 | TNBC | UPID02 |
| MAP3K8 | Missense | chr10:30748235 | p.G360W | G>T | NM_001244134 | TNBC | UPID02 |
| AKR1C3 | Missense | chr10:5136710 | p.A25V | C>T | NM_001253909 | TNBC | UPID02 |
| HKDC1 | Missense | chr10:71010157 | p.I561T | T>C | NM_025130 | TNBC | UPID02 |
| MMS19 | Splice site | chr10:99219041 | c.2776-2A>G | T>C | NM_001289403 | TNBC | UPID02 |
| OR4D5 | Missense | chr11:123811270 | p.P316L | C>T | NM_001001965 | TNBC | UPID02 |
| SRPRA | Nonsense | chr11:126135282 | p.Q370* | G>A | NM_001177842 | TNBC | UPID02 |
| KIRREL3 | Missense | chr11:126316737 | p.L348V | G>C | NM_001161707 | TNBC | UPID02 |
| NRXN2 | Missense | chr11:64416251 | p.A1040T | C>T | NM_138732 | TNBC | UPID02 |
| CAPN1 | Missense | chr11:64950192 | p.T7R | C>G | NM_001198868 | TNBC | UPID02 |
| DNHD1 | Missense | chr11:6567882 | p.A1905P | G>C | NM_144666 | TNBC | UPID02 |
| DPP3 | Missense | chr11:66261016 | p.L404P | T>C | NM_001256670 | TNBC | UPID02 |
| FUT4 | Missense | chr11:94277490 | p.A64G | C>G | NM_002033 | TNBC | UPID02 |
| SLC5A8 | Frameshift | chr12:101561896 | p.L433Wfs*14 | delA | NM_145913 | TNBC | UPID02 |
| PAH | Missense | chr12:103271326 | p.P119S | G>A | NM_000277 | TNBC | UPID02 |
| EIF2S3B | Missense | chr12:10659154 | p.G218E | G>A | NM_001357731 | TNBC | UPID02 |
| RIC8B | Missense | chr12:107169198 | p.N19D | A>G | NM_001351361 | TNBC | UPID02 |
| PDZRN4 | Missense | chr12:41967454 | p.R700H | G>A | NM_013377 | TNBC | UPID02 |
| ESPL1 | Missense | chr12:53673521 | p.M790I | G>A | NM_012291 | TNBC | UPID02 |
| ITGA7 | Missense | chr12:56091500 | p.A15V | G>A | NM_001367994 | TNBC | UPID02 |
| NUP107 | Missense | chr12:69126419 | p.E638D | G>T | NM_001330192 | TNBC | UPID02 |
| GGACT | Missense | chr13:101184823 | p.G8D | C>T | NM_033110 | TNBC | UPID02 |
| ZMYM2 | Nonsense | chr13:20657810 | p.G1279* | G>T | NM_001190965 | TNBC | UPID02 |
| ATP12A | Nonsense | chr13:25274923 | p.E588* | G>T | NM_001185085 | TNBC | UPID02 |
| FRY | Splice site | chr13:32753810 | c.2872-2A>G | A>G | NM_023037 | TNBC | UPID02 |
| MRPS31 | Missense | chr13:41333085 | p.S200G | T>C | NM_005830 | TNBC | UPID02 |
| NUFIP1 | Missense | chr13:45563442 | p.P44S | G>A | NM_012345 | TNBC | UPID02 |
| ERICH6B | Missense | chr13:46115763 | p.A642V | G>A | NM_182542 | TNBC | UPID02 |
| RNASEH2B | Missense | chr13:51530597 | p.I309N | T>A | NM_024570 | TNBC | UPID02 |
| DOCK9 | Missense | chr13:99498295 | p.P1361S | G>A | NM_001366681 | TNBC | UPID02 |
| SLC25A29 | Missense | chr14:100759186 | p.A50T | C>T | NM_152333 | TNBC | UPID02 |
| GMPR2 | Missense | chr14:24706745 | p.P243H | C>A | NM_001283022 | TNBC | UPID02 |
| SNX6 | Missense | chr14:35036917 | p.A344V | G>A | NM_001366519 | TNBC | UPID02 |
| NIN | Missense | chr14:51196323 | p.R1286L | C>A | NM_016350 | TNBC | UPID02 |
| PSMA3 | Missense | chr14:58724512 | p.R93I | G>T | NM_002788 | TNBC | UPID02 |
| GALNT16 | Missense | chr14:69795202 | p.A202T | G>A | NM_001168368 | TNBC | UPID02 |
| ABCD4 | Missense | chr14:74766932 | p.Q26H | C>A | NM_001353591 | TNBC | UPID02 |
| FAM181A | Missense | chr14:94395475 | p.P282S | C>T | NM_001207071 | TNBC | UPID02 |
| ATP10A | Missense | chr15:25925029 | p.A1320V | G>A | NM_024490 | TNBC | UPID02 |
| SPG11 | Missense | chr15:44856811 | p.N2249S | T>C | NM_001160227 | TNBC | UPID02 |
| HERC1 | Missense | chr15:63950863 | p.Q3160R | T>C | NM_003922 | TNBC | UPID02 |
| TLE3 | Missense | chr15:70349952 | p.A301V | G>A | NM_001282982 | TNBC | UPID02 |
| PEAK1 | Missense | chr15:77473555 | p.E238D | C>A | NM_024776 | TNBC | UPID02 |
| ARNT2 | Missense | chr15:80867328 | p.V464I | G>A | NM_014862 | TNBC | UPID02 |
| KIF7 | Missense | chr15:90171748 | p.A1312T | C>T | NM_198525 | TNBC | UPID02 |
| UNC45A | Missense | chr15:91496814 | p.M756I | G>T | NM_001323620 | TNBC | UPID02 |
| MYH11 | Missense | chr16:15814043 | p.R1640G | T>C | NM_002474 | TNBC | UPID02 |
| VPS35L | Missense | chr16:19648976 | p.V499M | G>A | NM_001300743 | TNBC | UPID02 |
| DNAH3 | Missense | chr16:21069454 | p.F1247L | A>G | NM_001347886 | TNBC | UPID02 |
| PDZD9 | Missense | chr16:22000006 | p.K46N | C>A | NM_173806 | TNBC | UPID02 |
| STX1B | Frameshift | chr16:31004753 | p.T196Afs*3 | delCTCGT | NM_052874 | TNBC | UPID02 |
| KAT8 | Missense | chr16:31129142 | p.A47V | C>T | NM_032188 | TNBC | UPID02 |
| SLX4 | Missense | chr16:3658692 | p.R92G | T>C | NM_032444 | TNBC | UPID02 |
| LONP2 | Missense | chr16:48278396 | p.V33M | G>A | NM_001300948 | TNBC | UPID02 |
| CNGB1 | Missense | chr16:57949214 | p.L742S | A>G | NM_001286130 | TNBC | UPID02 |
| FHOD1 | Missense | chr16:67265670 | p.A752V | G>A | NM_013241 | TNBC | UPID02 |
| DERPC | Splice site | chr16:69152429 | c.323-1G>T | C>A | NM_001366605 | TNBC | UPID02 |
| FCSK | Missense | chr16:70513567 | p.C1080Y | G>A | NM_145059 | TNBC | UPID02 |
| DHX38 | Missense | chr16:72137086 | p.Q538R | A>G | NM_014003 | TNBC | UPID02 |
| ZFP1 | Nonsense | chr16:75204122 | p.R339* | C>T | NM_001318472 | TNBC | UPID02 |
| TAF1C | Missense | chr16:84218513 | p.M28V | T>C | NM_001243156 | TNBC | UPID02 |
| SPECC1 | Missense | chr17:20108480 | p.L292P | T>C | NM_001033554 | TNBC | UPID02 |
| PHF12 | Missense | chr17:27250998 | p.A215V | G>A | NM_001033561 | TNBC | UPID02 |
| TOP2A | Missense | chr17:38567411 | p.P385A | G>C | NM_001067 | TNBC | UPID02 |
| KRTAP1-5 | Missense | chr17:39182894 | p.P172S | G>A | NM_031957 | TNBC | UPID02 |
| EFTUD2 | Missense | chr17:42953434 | p.A211V | G>A | NM_001142605 | TNBC | UPID02 |
| OSBPL7 | Missense | chr17:45885695 | p.P831S | G>A | NM_145798 | TNBC | UPID02 |
| POLR2A | Missense | chr17:7399375 | p.R70H | G>A | NM_000937 | TNBC | UPID02 |
| TP53 | Missense | chr17:7578203 | p.V177M | C>T | NM_001276760 | TNBC | UPID02 |
| DNAH17 | Missense | chr17:76547700 | p.E770K | C>T | NM_173628 | TNBC | UPID02 |
| ENPP7 | Missense | chr17:77707360 | p.S103N | G>A | NM_178543 | TNBC | UPID02 |
| ANKRD30B | Missense | chr18:14799112 | p.N681S | A>G | NM_001367607 | TNBC | UPID02 |
| SLC14A2 | Missense | chr18:43258964 | p.A846V | C>T | NM_007163 | TNBC | UPID02 |
| ZNF791 | Missense | chr19:12739476 | p.H378R | A>G | NM_153358 | TNBC | UPID02 |
| WDR83 | Missense | chr19:12786434 | p.S299N | G>A | NM_032332 | TNBC | UPID02 |
| CCDC105 | Missense | chr19:15122147 | p.K170N | G>T | NM_173482 | TNBC | UPID02 |
| PGLYRP2 | Missense | chr19:15580417 | p.T556M | G>A | NM_001363546 | TNBC | UPID02 |
| PEAK3 | Missense | chr19:2275773 | p.E443G | T>C | NM_198532 | TNBC | UPID02 |
| TLE6 | Missense | chr19:2989627 | p.D240G | A>G | NM_024760 | TNBC | UPID02 |
| EID2 | Missense | chr19:40030161 | p.A187T | C>T | NM_153232 | TNBC | UPID02 |
| LTBP4 | Missense | chr19:41103207 | p.P32H | G>A | NM_001042544 | TNBC | UPID02 |
| SLC8A2 | Missense | chr19:47969579 | p.L28M | G>T | NM_015063 | TNBC | UPID02 |
| EHD2 | Missense | chr19:48229465 | p.R300T | G>C | NM_014601 | TNBC | UPID02 |
| CLEC11A | Missense | chr19:51227842 | p.E170D | G>T | NM_002975 | TNBC | UPID02 |
| ZNF865 | Missense | chr19:56127473 | p.A830V | C>T | NM_001195605 | TNBC | UPID02 |
| HSD11B1L | Missense | chr19:5687351 | p.S22N | G>A | NM_001267869 | TNBC | UPID02 |
| PSPN | Missense | chr19:6375357 | p.R140H | C>T | NM_004158 | TNBC | UPID02 |
| LPIN1 | Missense | chr2:11928555 | p.M526I | G>A | NM_001349201 | TNBC | UPID02 |
| PROC | Missense | chr2:128184792 | p.R264G | A>G | NM_000312 | TNBC | UPID02 |
| TTN | Missense | chr2:179588690 | p.C7099Y | C>T | NM_133378 | TNBC | UPID02 |
| TTN | Missense | chr2:179622383 | p.A3522T | C>T | NM_133432 | TNBC | UPID02 |
| FAM171B | Missense | chr2:187627380 | p.I771V | A>G | NM_177454 | TNBC | UPID02 |
| ORMDL1 | Missense | chr2:190647180 | p.A48P | C>G | NM_001128150 | TNBC | UPID02 |
| GTF3C3 | Missense | chr2:197664293 | p.K15Q | T>G | NM_001206774 | TNBC | UPID02 |
| MOB4 | Missense | chr2:198415021 | p.V132I | G>A | NM_001100819 | TNBC | UPID02 |
| MDH1B | Missense | chr2:207619801 | p.A183V | G>A | NM_001330223 | TNBC | UPID02 |
| UNC80 | Missense | chr2:210636849 | p.I18T | T>C | NM_001371986 | TNBC | UPID02 |
| TMEM198 | Missense | chr2:220412779 | p.A240T | G>A | NM_001005209 | TNBC | UPID02 |
| TRIP12 | Missense | chr2:230654458 | p.S1177A | A>C | NM_001284216 | TNBC | UPID02 |
| LRRFIP1 | Missense | chr2:238671465 | p.Q314L | A>T | NM_001137553 | TNBC | UPID02 |
| USP39 | Missense | chr2:85872105 | p.V385I | G>A | NM_001256728 | TNBC | UPID02 |
| ARID5A | Missense | chr2:97215146 | p.K70R | A>G | NM_001319085 | TNBC | UPID02 |
| TGM2 | Missense | chr20:36784383 | p.L40P | A>G | NM_001323318 | TNBC | UPID02 |
| MYBL2 | Missense | chr20:42344680 | p.G662S | G>A | NM_001278610 | TNBC | UPID02 |
| MYBL2 | Missense | chr20:42344692 | p.P666S | C>T | NM_001278610 | TNBC | UPID02 |
| PRELID3B | Missense | chr20:57613645 | p.P26Q | G>T | NM_001256403 | TNBC | UPID02 |
| TRMT6 | Missense | chr20:5924670 | p.A156P | C>G | NM_015939 | TNBC | UPID02 |
| IFNAR2 | Missense | chr21:34619045 | p.V82F | G>T | NM_000874 | TNBC | UPID02 |
| TTC3 | Missense | chr21:38516923 | p.E314G | A>G | NM_001330681 | TNBC | UPID02 |
| PDE9A | Missense | chr21:44185596 | p.M233L | A>C | NM_001001580 | TNBC | UPID02 |
| SGSM1 | Missense | chr22:25280133 | p.R537W | A>T | NM_001098497 | TNBC | UPID02 |
| CELSR1 | Missense | chr22:46763730 | p.L2659F | G>A | NM_014246 | TNBC | UPID02 |
| GRAMD4 | Missense | chr22:47022721 | p.R35G | A>G | NM_001366660 | TNBC | UPID02 |
| ALG12 | Missense | chr22:50301525 | p.I279T | A>G | NM_024105 | TNBC | UPID02 |
| PHLDB2 | Missense | chr3:111603605 | p.K227N | G>T | NM_001134438 | TNBC | UPID02 |
| ACAD9 | Missense | chr3:128618176 | p.A227V | C>T | NM_014049 | TNBC | UPID02 |
| H1-10 | Missense | chr3:129034114 | p.G211D | C>T | NM_006026 | TNBC | UPID02 |
| FOXL2 | Missense | chr3:138665530 | p.A12V | G>A | NM_023067 | TNBC | UPID02 |
| PLCL2 | Missense | chr3:17109466 | p.H912R | A>G | NM_015184 | TNBC | UPID02 |
| XIRP1 | Missense | chr3:39225538 | p.G483A | C>G | NM_001351377 | TNBC | UPID02 |
| APEH | Missense | chr3:49712012 | p.V35I | G>A | NM_001640 | TNBC | UPID02 |
| RRP9 | Missense | chr3:51970335 | p.I225V | T>C | NM_004704 | TNBC | UPID02 |
| GNL3 | Missense | chr3:52724635 | p.S190N | G>A | NM_014366 | TNBC | UPID02 |
| SRGAP3 | Missense | chr3:9027477 | p.P985L | G>A | NM_001033117 | TNBC | UPID02 |
| OR5H1 | Missense | chr3:97852349 | p.Q270K | C>A | NM_001005338 | TNBC | UPID02 |
| OR5H14 | Missense | chr3:97869022 | p.P265T | C>A | NM_001005514 | TNBC | UPID02 |
| SULT1E1 | Splice site | chr4:70710060 | c.592-1G>A | C>T | NM_005420 | TNBC | UPID02 |
| ADAMTS19 | Missense | chr5:129015505 | p.E852G | A>G | NM_133638 | TNBC | UPID02 |
| PLAC8L1 | Missense | chr5:145464020 | p.P170L | G>A | NM_001029869 | TNBC | UPID02 |
| FAXDC2 | Missense | chr5:154210423 | p.D102N | C>T | NM_032385 | TNBC | UPID02 |
| MARCHF11 | Missense | chr5:16091078 | p.P269H | G>T | NM_001102562 | TNBC | UPID02 |
| CDHR2 | Missense | chr5:176004415 | p.F404L | T>C | NM_001171976 | TNBC | UPID02 |
| MXD3 | Missense | chr5:176737515 | p.E78G | T>C | NM_001142935 | TNBC | UPID02 |
| IL6ST | Missense | chr5:55256248 | p.G18R | C>T | NM_001364278 | TNBC | UPID02 |
| SGTB | Missense | chr5:65008859 | p.I45V | T>C | NM_019072 | TNBC | UPID02 |
| FAM184A | Nonsense | chr6:119344233 | p.Q223* | G>A | NM_001100411 | TNBC | UPID02 |
| RANBP9 | Missense | chr6:13657373 | p.T291S | G>C | NM_005493 | TNBC | UPID02 |
| ADGB | Missense | chr6:147062363 | p.K1045E | A>G | NM_024694 | TNBC | UPID02 |
| PACSIN1 | Missense | chr6:34498130 | p.P300H | C>A | NM_001199583 | TNBC | UPID02 |
| TBCC | Missense | chr6:42713136 | p.R226W | G>A | NM_003192 | TNBC | UPID02 |
| CLIC5 | Missense | chr6:45922933 | p.L197I | G>T | NM_001114086 | TNBC | UPID02 |
| CD2AP | Splice site | chr6:47512341 | c.320-1G>C | G>C | NM_012120 | TNBC | UPID02 |
| FAM135A | Missense | chr6:71186936 | p.L115P | T>C | NM_001331000 | TNBC | UPID02 |
| TSC22D4 | Missense | chr7:100071967 | p.A287T | C>T | NM_001303043 | TNBC | UPID02 |
| TRIP6 | Missense | chr7:100469286 | p.G374D | G>A | NM_003302 | TNBC | UPID02 |
| IMMP2L | Missense | chr7:110603572 | p.E97Q | C>G | NM_032549 | TNBC | UPID02 |
| ZNF107 | Missense | chr7:64167020 | p.F150S | T>C | NM_001282360 | TNBC | UPID02 |
| ERV3-1 | Missense | chr7:64453361 | p.L15P | A>G | NM_001007253 | TNBC | UPID02 |
| PPP1R9A | Missense | chr7:94833014 | p.C643Y | G>A | NM_001166160 | TNBC | UPID02 |
| RP1L1 | Missense | chr8:10468429 | p.A1060V | G>A | NM_178857 | TNBC | UPID02 |
| MYC | Missense | chr8:128751245 | p.P260L | C>T | NM_001354870 | TNBC | UPID02 |
| CCN4 | Missense | chr8:134237654 | p.A124V | C>T | NM_080838 | TNBC | UPID02 |
| MROH6 | Missense | chr8:144652476 | p.A327V | G>A | NM_001100878 | TNBC | UPID02 |
| IQANK1 | Missense | chr8:144822088 | p.A49Thr | G>A | NM_001381874 | TNBC | UPID02 |
| RAB11FIP1 | Missense | chr8:37730266 | p.S685N | C>T | NM_001002814 | TNBC | UPID02 |
| ZBTB10 | Missense | chr8:81431701 | p.D852N | G>A | NM_001105539 | TNBC | UPID02 |
| RGS3 | Splice site | chr9:116247904 | c.621-1G>A | G>A | NM_144488 | TNBC | UPID02 |
| RRAGA | Missense | chr9:19049947 | p.R97H | G>A | NM_006570 | TNBC | UPID02 |
| PLAA | Missense | chr9:26907839 | p.C582W | A>C | NM_001321546 | TNBC | UPID02 |
| DNAI1 | Missense | chr9:34485185 | p.A43T | G>A | NM_001281428 | TNBC | UPID02 |
| NOL8 | Missense | chr9:95078146 | p.A254V | G>A | NM_001330722 | TNBC | UPID02 |
| DRP2 | Missense | chrX:100500387 | p.Q298K | C>A | NM_001171184 | TNBC | UPID02 |
| BCORL1 | Missense | chrX:129155049 | p.R1177S | G>T | NM_001184772 | TNBC | UPID02 |
| ELF4 | Missense | chrX:129208726 | p.L26P | A>G | NM_001127197 | TNBC | UPID02 |
| RENBP | Nonsense | chrX:153209843 | p.Q19* | G>A | NM_002910 | TNBC | UPID02 |
| FLNA | Missense | chrX:153580301 | p.E2278D | C>A | NM_001456 | TNBC | UPID02 |
| MTMR8 | Missense | chrX:63488461 | p.S691P | A>G | NM_017677 | TNBC | UPID02 |
| PGAM4 | Missense | chrX:77224694 | p.D148H | C>G | NM_001029891 | TNBC | UPID02 |
| STXBP3 | Missense | chr1:109339300 | p.S436R | T>A | NM_007269 | TNBC | UPID03 |
| C1orf194 | Missense | chr1:109648690 | p.G118D | C>T | NM_001366201 | TNBC | UPID03 |
| SORT1 | Nonsense | chr1:109890149 | p.S127* | G>C | NM_001205228 | TNBC | UPID03 |
| DENND4B | Missense | chr1:153903470 | p.P1367R | G>C | NM_001367466 | TNBC | UPID03 |
| TRIM46 | Missense | chr1:155151056 | p.M292L | A>T | NM_001282378 | TNBC | UPID03 |
| NES | Missense | chr1:156646776 | p.R94Q | C>T | NM_006617 | TNBC | UPID03 |
| ATP1A4 | Missense | chr1:160121855 | p.T9A | A>G | NM_144699 | TNBC | UPID03 |
| NOS1AP | Missense | chr1:162040030 | p.H21Q | C>G | NM_001164757 | TNBC | UPID03 |
| RGSL1 | Missense | chr1:182427514 | p.I53V | A>G | NM_001137669 | TNBC | UPID03 |
| RGSL1 | Nonsense | chr1:182523768 | p.S1046* | C>G | NM_001137669 | TNBC | UPID03 |
| DENND1B | Missense | chr1:197479975 | p.R648K | C>T | NM_001195215 | TNBC | UPID03 |
| PIGR | Missense | chr1:207110628 | p.L286P | A>G | NM_002644 | TNBC | UPID03 |
| FAAP20 | Missense | chr1:2124319 | p.T189R | G>C | NM_001256946 | TNBC | UPID03 |
| GPATCH2 | Missense | chr1:217804260 | p.S18R | G>C | NM_001297754 | TNBC | UPID03 |
| RYR2 | Nonsense | chr1:237666658 | p.C822* | T>A | NM_001035 | TNBC | UPID03 |
| MAN1C1 | Missense | chr1:25944751 | p.P155A | C>G | NM_001289010 | TNBC | UPID03 |
| ARHGEF16 | Missense | chr1:3396127 | p.Q621K | C>A | NM_014448 | TNBC | UPID03 |
| ZMYM4 | Splice site | chr1:35846858 | c.1182-2A>T | A>T | NM_001350138 | TNBC | UPID03 |
| MACF1 | Missense | chr1:39818853 | p.G1730W | G>T | NM_012090 | TNBC | UPID03 |
| CTPS1 | Missense | chr1:41461649 | p.G105R | G>C | NM_001301237 | TNBC | UPID03 |
| TSPAN1 | Missense | chr1:46646803 | p.K8N | G>C | NM_005727 | TNBC | UPID03 |
| MIGA1 | Missense | chr1:78326984 | p.E451K | G>A | NM_001270384 | TNBC | UPID03 |
| DNAI3 | Nonsense | chr1:85592250 | p.W684* | G>A | NM_001288563 | TNBC | UPID03 |
| CLSTN1 | Missense | chr1:9791446 | p.V837F | C>A | NM_001302883 | TNBC | UPID03 |
| LOC100505502 | Missense | chr10:31652399 | p.Q119E | G>C | NM_001368169 | TNBC | UPID03 |
| CUL2 | Missense | chr10:35321397 | p.R316K | C>T | NM_001324375 | TNBC | UPID03 |
| RASSF4 | Missense | chr10:45478089 | p.P87S | C>T | NM_032023 | TNBC | UPID03 |
| NCOA4 | Missense | chr10:51579278 | p.R46Q | G>A | NM_001145262 | TNBC | UPID03 |
| PBLD | Frameshift | chr10:70051937 | p.L110Qfs*22 | delTCGTCTGGCCCTTAGT | NM_001033083 | TNBC | UPID03 |
| HKDC1 | Missense | chr10:71002950 | p.N235S | A>G | NM_025130 | TNBC | UPID03 |
| ZSWIM8 | Missense | chr10:75552066 | p.G590A | G>C | NM_001242487 | TNBC | UPID03 |
| AP3M1 | Splice site | chr10:75889000 | c.670-1G>C | C>G | NM_001320264 | TNBC | UPID03 |
| DUSP29 | Nonsense | chr10:76818117 | p.Tyr52* | G>C | NM_001003892 | TNBC | UPID03 |
| PPIF | Splice site | chr10:81111341 | c.412+2T>A | T>A | NM_005729 | TNBC | UPID03 |
| BTAF1 | Missense | chr10:93767880 | p.A1221S | G>T | NM_003972 | TNBC | UPID03 |
| RRM1 | Missense | chr11:4148415 | p.E203Q | G>C | NM_001318065 | TNBC | UPID03 |
| API5 | Missense | chr11:43333723 | p.D16Y | G>T | NM_001142930 | TNBC | UPID03 |
| FAM111B | Missense | chr11:58893315 | p.G552V | G>T | NM_001142704 | TNBC | UPID03 |
| OSBP | Missense | chr11:59361163 | p.A531D | G>T | NM_002556 | TNBC | UPID03 |
| PDE2A | Missense | chr11:72353390 | p.A11S | C>A | NM_001143839 | TNBC | UPID03 |
| FCHSD2 | Missense | chr11:72632962 | p.D247N | C>T | NM_014824 | TNBC | UPID03 |
| NUAK1 | Missense | chr12:106532418 | p.A5V | G>A | NM_014840 | TNBC | UPID03 |
| TBX3 | Missense | chr12:115110096 | p.M574I | C>T | NM_005996 | TNBC | UPID03 |
| MED13L | Missense | chr12:116457073 | p.P322H | C>T | NM_015335 | TNBC | UPID03 |
| ADGRD1 | Missense | chr12:131439188 | p.R29T | G>C | NM_001330497 | TNBC | UPID03 |
| DCP1B | Missense | chr12:2113501 | p.D33N | C>T | NM_001319292 | TNBC | UPID03 |
| IQSEC3 | Missense | chr12:234958 | p.R261S | G>T | NM_001170738 | TNBC | UPID03 |
| SMCO2 | Missense | chr12:27648689 | p.H245P | A>C | NM_001145010 | TNBC | UPID03 |
| XPOT | Missense | chr12:64824030 | p.L647I | C>A | NM_007235 | TNBC | UPID03 |
| C1S | Nonsense | chr12:7177883 | p.Y498* | C>A | NM_001346850 | TNBC | UPID03 |
| APOBEC1 | Missense | chr12:7805163 | p.S60R | T>G | NM_005889 | TNBC | UPID03 |
| RIMKLB | Missense | chr12:8902627 | p.K115N | G>C | NM_001297776 | TNBC | UPID03 |
| ZIC5 | Missense | chr13:100623730 | p.Q67P | T>G | NM_033132 | TNBC | UPID03 |
| CCDC168 | Missense | chr13:103387411 | p.H5212Q | G>C | NM_001146197 | TNBC | UPID03 |
| SKA3 | Splice site | chr13:21734127 | c.830-1insATCCAGGCTCAATGATAATGTTTTTGCCACTCCCAGCCCCATCATCCAGCAGTTGGAAAAAAGT | insACTTTTTTCCAACTGCTGGATGATGGGGCTGGGAGTGGCAAAAACATTATCATTGAGCCTGGAT | NM_001166017 | TNBC | UPID03 |
| FRY | Missense | chr13:32747510 | p.A720T | G>A | NM_023037 | TNBC | UPID03 |
| COG6 | Missense | chr13:40233519 | p.K58E | A>G | NM_001145079 | TNBC | UPID03 |
| MARK3 | Missense | chr14:103946770 | p.C431F | G>T | NM_001128921 | TNBC | UPID03 |
| FBXO34 | Missense | chr14:55819013 | p.C635W | C>G | NM_017943 | TNBC | UPID03 |
| SIX4 | Missense | chr14:61186595 | p.I478V | T>C | NM_017420 | TNBC | UPID03 |
| SERPINA4 | Nonsense | chr14:95030183 | p.Q159* | C>T | NM_001289032 | TNBC | UPID03 |
| DICER1 | Nonsense | chr14:95556968 | p.*1879S | C>G | NM_177438 | TNBC | UPID03 |
| TRPM1 | Missense | chr15:31294896 | p.T1353R | G>C | NM_001252020 | TNBC | UPID03 |
| ADAL | Missense | chr15:43627931 | p.H34P | A>C | NM_001012969 | TNBC | UPID03 |
| SPATA5L1 | Missense | chr15:45695558 | p.Q311E | C>G | NM_001323640 | TNBC | UPID03 |
| CTXN2 | Splice site | chr15:48493435 | c.57-6A>G | A>G | NM_001145668 | TNBC | UPID03 |
| PLIN1 | Missense | chr15:90213285 | p.G175V | C>A | NM_001145311 | TNBC | UPID03 |
| BLM | Missense | chr15:91303970 | p.S456L | C>T | NM_000057 | TNBC | UPID03 |
| SV2B | Missense | chr15:91769540 | p.S16I | G>T | NM_001323031 | TNBC | UPID03 |
| TEKT5 | Missense | chr16:10788709 | p.Q8E | G>C | NM_144674 | TNBC | UPID03 |
| SNX29 | Missense | chr16:12142426 | p.P233T | C>A | NM_032167 | TNBC | UPID03 |
| GGA2 | Splice site | chr16:23492092 | c.881-1G>A | C>T | NM_015044 | TNBC | UPID03 |
| CENPT | Nonsense | chr16:67865220 | p.S201* | G>C | NM_025082 | TNBC | UPID03 |
| BCAR1 | Missense | chr16:75298337 | p.G21V | C>A | NM_001170714 | TNBC | UPID03 |
| BCO1 | Missense | chr16:81301625 | p.N244K | C>A | NM_017429 | TNBC | UPID03 |
| KIAA0513 | Missense | chr16:85100839 | p.E54D | G>T | NM_001286565 | TNBC | UPID03 |
| C16orf95 | Missense | chr16:87350741 | p.S20L | G>A | NM_001256917 | TNBC | UPID03 |
| PIGL | Missense | chr17:16229154 | p.R234H | G>A | NM_004278 | TNBC | UPID03 |
| TMEM11 | Missense | chr17:21101807 | p.E137Q | C>G | NM_003876 | TNBC | UPID03 |
| TMEM132E | Missense | chr17:32964374 | p.L783P | T>C | NM_001304438 | TNBC | UPID03 |
| STAC2 | Missense | chr17:37373411 | p.G138D | C>T | NM_198993 | TNBC | UPID03 |
| KRT20 | Missense | chr17:39032698 | p.T397I | G>A | NM_019010 | TNBC | UPID03 |
| KRT9 | Missense | chr17:39723593 | p.G602S | C>T | NM_000226 | TNBC | UPID03 |
| JUP | Missense | chr17:39925407 | p.A174V | G>A | NM_001352773 | TNBC | UPID03 |
| BRCA1 | Missense | chr17:41209107 | p.Q1700K | G>T | NM_007297 | TNBC | UPID03 |
| FMNL1 | Missense | chr17:43310613 | p.S117F | C>T | NM_005892 | TNBC | UPID03 |
| MINK1 | Missense | chr17:4797502 | p.D865N | G>A | NM_015716 | TNBC | UPID03 |
| DLX3 | Nonsense | chr17:48070892 | p.R130* | G>A | NM_005220 | TNBC | UPID03 |
| ABCC3 | Missense | chr17:48733226 | p.D27H | G>C | NM_001144070 | TNBC | UPID03 |
| ABCC3 | Frameshift | chr17:48762118 | p.S1389Ffs*63 | delGGCAGCTACTCAGAGGAGGACATTTGGTG | NM_003786 | TNBC | UPID03 |
| ZFP3 | Nonsense | chr17:4996236 | p.C479* | C>A | NM_153018 | TNBC | UPID03 |
| TTYH2 | Missense | chr17:72233599 | p.V173A | T>C | NM_001330453 | TNBC | UPID03 |
| OTOP2 | Missense | chr17:72923358 | p.V164D | T>A | NM_178160 | TNBC | UPID03 |
| CASKIN2 | Missense | chr17:73500720 | p.A334V | G>A | NM_001142643 | TNBC | UPID03 |
| ZBTB4 | Missense | chr17:7366116 | p.G729R | C>T | NM_001128833 | TNBC | UPID03 |
| CHD3 | Missense | chr17:7800571 | p.I685M | C>G | NM_001005271 | TNBC | UPID03 |
| SLC26A11 | Missense | chr17:78221989 | p.G452D | G>A | NM_001166348 | TNBC | UPID03 |
| DLGAP1 | Missense | chr18:3814209 | p.R39T | C>G | NM_001003809 | TNBC | UPID03 |
| LOXHD1 | Missense | chr18:44140348 | p.K920M | T>A | NM_144612 | TNBC | UPID03 |
| ANKRD12 | Missense | chr18:9256670 | p.N1112K | T>A | NM_001083625 | TNBC | UPID03 |
| CDC37 | Missense | chr19:10506703 | p.K93N | C>G | NM_007065 | TNBC | UPID03 |
| DNAJB1 | Missense | chr19:14627313 | p.D153H | C>G | NM_001300914 | TNBC | UPID03 |
| LSM7 | Missense | chr19:2328462 | p.K7N | C>G | NM_016199 | TNBC | UPID03 |
| ZNF556 | Missense | chr19:2877497 | p.G180R | G>C | NM_001300843 | TNBC | UPID03 |
| PLEKHF1 | Missense | chr19:30164998 | p.E84D | G>C | NM_024310 | TNBC | UPID03 |
| DMKN | Missense | chr19:36003574 | p.G182D | C>T | NM_001126056 | TNBC | UPID03 |
| PRX | Missense | chr19:40900196 | p.E1355Q | C>G | NM_181882 | TNBC | UPID03 |
| SPTBN4 | Missense | chr19:41040241 | p.K126N | G>C | NM_025213 | TNBC | UPID03 |
| LTBP4 | Missense | chr19:41103235 | p.P32H | C>A | NM_001042544 | TNBC | UPID03 |
| RSPH6A | Missense | chr19:46318078 | p.M119I | C>T | NM_030785 | TNBC | UPID03 |
| ZNF667 | Missense | chr19:56953058 | p.I436V | T>C | NM_022103 | TNBC | UPID03 |
| ZNF835 | Missense | chr19:57175884 | p.A228G | G>C | NM_001005850 | TNBC | UPID03 |
| DENND1C | Frameshift | chr19:6477403 | p.Q92Wfs*9 | delCTGAGGCCTGGGGCCCAGACAGGGACTG | NM_001290331 | TNBC | UPID03 |
| OR7G2 | Missense | chr19:9213453 | p.A177V | G>A | NM_001005193 | TNBC | UPID03 |
| SULT1C2 | Missense | chr2:108921903 | p.Q210H | G>C | NM_001056 | TNBC | UPID03 |
| GREB1 | Missense | chr2:11772212 | p.P1597A | C>G | NM_014668 | TNBC | UPID03 |
| BAZ2B | Missense | chr2:160239077 | p.E1297G | T>C | NM_001289975 | TNBC | UPID03 |
| BAZ2B | Missense | chr2:160241675 | p.S1190T | C>G | NM_001289975 | TNBC | UPID03 |
| PXDN | Missense | chr2:1665872 | p.E551V | T>A | NM_012293 | TNBC | UPID03 |
| NCKAP1 | Missense | chr2:183818044 | p.M723I | C>A | NM_013436 | TNBC | UPID03 |
| WDR75 | Missense | chr2:190328641 | p.G356D | G>A | NM_032168 | TNBC | UPID03 |
| C2CD6 | Missense | chr2:202436702 | p.M265I | C>T | NM_001168216 | TNBC | UPID03 |
| XRCC5 | Missense | chr2:216983788 | p.H131Y | C>T | NM_021141 | TNBC | UPID03 |
| CFAP65 | Missense | chr2:219878657 | p.F1238I | A>T | NM_194302 | TNBC | UPID03 |
| EPHA4 | Missense | chr2:222428912 | p.T70M | G>A | NM_001304537 | TNBC | UPID03 |
| COL4A3 | Missense | chr2:228104878 | p.G55V | G>T | NM_000091 | TNBC | UPID03 |
| DNAJB3 | Missense | chr2:234652540 | p.L8Q | A>T | NM_001001394 | TNBC | UPID03 |
| ITSN2 | Missense | chr2:24433768 | p.L1340V | G>C | NM_001348182 | TNBC | UPID03 |
| PRR30 | Missense | chr2:27360754 | p.H148Q | G>T | NM_178553 | TNBC | UPID03 |
| NRXN1 | Missense | chr2:50765473 | p.N659K | G>C | NM_001330087 | TNBC | UPID03 |
| EML6 | Nonsense | chr2:55191129 | p.L1722* | T>G | NM_001039753 | TNBC | UPID03 |
| FER1L5 | Missense | chr2:97334812 | p.P434S | C>T | NM_001293083 | TNBC | UPID03 |
| OVOL2 | Missense | chr20:18005298 | p.E138D | C>G | NM_001303462 | TNBC | UPID03 |
| THBD | Missense | chr20:23028613 | p.V510E | A>T | NM_000361 | TNBC | UPID03 |
| GZF1 | Missense | chr20:23345068 | p.N16K | C>G | NM_001317019 | TNBC | UPID03 |
| REM1 | Missense | chr20:30070286 | p.V207E | T>A | NM_014012 | TNBC | UPID03 |
| CASS4 | Missense | chr20:55027901 | p.D503H | G>C | NM_001164114 | TNBC | UPID03 |
| PI4KA | Missense | chr22:21161734 | p.A340S | C>A | NM_001362863 | TNBC | UPID03 |
| LOC284898 | Missense | chr22:27456117 | p.G68R | A>G | NM_001318329 | TNBC | UPID03 |
| MPPED1 | Splice site | chr22:43898638 | c.862+1G>A | G>A | NM_001044370 | TNBC | UPID03 |
| PNPLA3 | Missense | chr22:44335996 | p.I368S | T>G | NM_025225 | TNBC | UPID03 |
| MOV10L1 | Missense | chr22:50591498 | p.R100G | C>G | NM_001164106 | TNBC | UPID03 |
| NR1I2 | Missense | chr3:119531599 | p.A196S | G>T | NM_003889 | TNBC | UPID03 |
| POLQ | Missense | chr3:121200530 | p.L2034I | G>T | NM_199420 | TNBC | UPID03 |
| UMPS | Missense | chr3:124456417 | p.T105P | A>C | NM_000373 | TNBC | UPID03 |
| NUP210 | Missense | chr3:13395513 | p.Q808P | T>G | NM_024923 | TNBC | UPID03 |
| PLOD2 | Missense | chr3:145789177 | p.P607A | G>C | NM_000935 | TNBC | UPID03 |
| PLSCR4 | Missense | chr3:145924534 | p.A30P | C>G | NM_001177304 | TNBC | UPID03 |
| FGD5 | Missense | chr3:14942540 | p.D1079V | A>T | NM_001320276 | TNBC | UPID03 |
| CAPN7 | Missense | chr3:15283090 | p.D595N | G>A | NM_014296 | TNBC | UPID03 |
| MME | Missense | chr3:154832866 | p.R94C | C>T | NM_000902 | TNBC | UPID03 |
| LRRIQ4 | Missense | chr3:169540578 | p.T290S | C>G | NM_001080460 | TNBC | UPID03 |
| CTNNB1 | Missense | chr3:41266935 | p.M202I | G>A | NM_001098209 | TNBC | UPID03 |
| CSPG5 | Missense | chr3:47618684 | p.E140Q | C>G | NM_001206942 | TNBC | UPID03 |
| STAB1 | Missense | chr3:52556799 | p.F2251L | C>A | NM_015136 | TNBC | UPID03 |
| FGFRL1 | Missense | chr4:1017871 | p.Y234H | T>C | NM_021923 | TNBC | UPID03 |
| OTUD4 | Missense | chr4:146059210 | p.V841G | A>C | NM_001102653 | TNBC | UPID03 |
| TECRL | Missense | chr4:65188475 | p.S123C | T>A | NM_001010874 | TNBC | UPID03 |
| PF4 | Missense | chr4:74847205 | p.Q58H | C>A | NM_001363352 | TNBC | UPID03 |
| LMNB1 | Nonsense | chr5:126140613 | p.Q169* | C>T | NM_005573 | TNBC | UPID03 |
| IGIP | Frameshift | chr5:139508072 | p.Y5Efs*9 | delATTATCAC | NM_001007189 | TNBC | UPID03 |
| CPEB4 | Splice site | chr5:173359452 | c.1208-1G>C | G>C | NM_030627 | TNBC | UPID03 |
| PRR7 | Missense | chr5:176882193 | p.Q42R | A>G | NM_001174101 | TNBC | UPID03 |
| ADAMTS12 | Missense | chr5:33662130 | p.V311F | C>A | NM_001324512 | TNBC | UPID03 |
| NIPBL | Missense | chr5:37045611 | p.K2137I | A>T | NM_015384 | TNBC | UPID03 |
| LIFR | Missense | chr5:38482290 | p.N901Y | T>A | NM_001127671 | TNBC | UPID03 |
| FYB1 | Missense | chr5:39202844 | p.K83N | C>G | NM_001243093 | TNBC | UPID03 |
| NNT | Missense | chr5:43644839 | p.D278Y | G>T | NM_001331026 | TNBC | UPID03 |
| RGS7BP | Missense | chr5:63894230 | p.R84M | G>T | NM_001271890 | TNBC | UPID03 |
| MAP1B | Missense | chr5:71491910 | p.E784K | G>A | NM_001324255 | TNBC | UPID03 |
| AKAP7 | Frameshift | chr6:131490254 | p.G144Vfs*8 | delG | NM_016377 | TNBC | UPID03 |
| ARFGEF3 | Splice site | chr6:138638517 | c.4474+1G>C | G>C | NM_020340 | TNBC | UPID03 |
| SOD2 | Missense | chr6:160113575 | p.S115C | G>C | NM_001322816 | TNBC | UPID03 |
| OR2B2 | Missense | chr6:27879650 | p.I150V | T>C | NM_033057 | TNBC | UPID03 |
| TRERF1 | Missense | chr6:42196193 | p.D1185Y | C>A | NM_001297573 | TNBC | UPID03 |
| MUC12 | Missense | chr7:100639708 | p.T1955R | C>G | NM_001164462 | TNBC | UPID03 |
| CDHR3 | Missense | chr7:105658322 | p.T398S | C>G | NM_001301161 | TNBC | UPID03 |
| PARP12 | Missense | chr7:139724473 | p.E665Q | C>G | NM_022750 | TNBC | UPID03 |
| TRPV6 | Missense | chr7:142571221 | p.D630Y | C>A | NM_018646 | TNBC | UPID03 |
| GIMAP7 | Missense | chr7:150217951 | p.F297L | T>C | NM_153236 | TNBC | UPID03 |
| INTS1 | Missense | chr7:1513234 | p.I1975M | G>C | NM_001080453 | TNBC | UPID03 |
| PAXIP1 | Nonsense | chr7:154759549 | p.Q624* | G>A | NM_007349 | TNBC | UPID03 |
| FAM221A | Missense | chr7:23740464 | p.F175L | T>C | NM_001127365 | TNBC | UPID03 |
| STK31 | Missense | chr7:23854788 | p.E906G | A>G | NM_001260504 | TNBC | UPID03 |
| PKD1L1 | Missense | chr7:47925421 | p.G1023E | C>T | NM_138295 | TNBC | UPID03 |
| RADIL | Nonsense | chr7:4843285 | p.Y797* | G>C | NM_018059 | TNBC | UPID03 |
| STAG3 | Missense | chr7:99786525 | p.Q143K | C>A | NM_001282718 | TNBC | UPID03 |
| PKHD1L1 | Missense | chr8:110457566 | p.L1823Q | T>A | NM_177531 | TNBC | UPID03 |
| EBAG9 | Missense | chr8:110563122 | p.K23N | G>C | NM_001278938 | TNBC | UPID03 |
| CSMD3 | Missense | chr8:113649081 | p.R1097Q | C>T | NM_001363185 | TNBC | UPID03 |
| TRAPPC9 | Missense | chr8:141034157 | p.N850T | T>G | NM_001321646 | TNBC | UPID03 |
| SLC45A4 | Missense | chr8:142221602 | p.A779E | G>T | NM_001080431 | TNBC | UPID03 |
| PDLIM2 | Missense | chr8:22436348 | p.R19Q | G>A | NM_021630 | TNBC | UPID03 |
| GNRH1 | Missense | chr8:25280712 | p.F49L | G>C | NM_000825 | TNBC | UPID03 |
| COPS5 | Missense | chr8:67970374 | p.D151N | C>T | NM_006837 | TNBC | UPID03 |
| CRISPLD1 | Missense | chr8:75924690 | p.R94T | G>C | NM_031461 | TNBC | UPID03 |
| ZFHX4 | Missense | chr8:77761801 | p.Q1233H | G>C | NM_024721 | TNBC | UPID03 |
| ZFHX4 | Missense | chr8:77764295 | p.F1713C | T>G | NM_024721 | TNBC | UPID03 |
| MRPS28 | Missense | chr8:80915245 | p.E128D | T>G | NM_014018 | TNBC | UPID03 |
| XPA | Nonsense | chr9:100437864 | p.K227* | G>A | NM_000380 | TNBC | UPID03 |
| ABCA1 | Missense | chr9:107562858 | p.S1569F | G>A | NM_005502 | TNBC | UPID03 |
| KCNT1 | Missense | chr9:138594145 | p.C14F | G>T | NM_001272003 | TNBC | UPID03 |
| CAMSAP1 | Missense | chr9:138703384 | p.Y1527S | T>G | NM_015447 | TNBC | UPID03 |
| NOTCH1 | Frameshift | chr9:139390989 | p.N2389Tfs*21 | delTTTGCTGGCTGCAGGTTCTGCTGCTGCATCTGTAAGT | NM_017617 | TNBC | UPID03 |
| ANKRD18B | Frameshift | chr9:33533516 | p.I193Tfs*4 | delAT | NM_001353432 | TNBC | UPID03 |
| PTAR1 | Missense | chr9:72365790 | p.G55S | C>T | NM_001099666 | TNBC | UPID03 |
| PWWP3B | Missense | chrX:105451064 | p.A547T | G>A | NM_001171020 | TNBC | UPID03 |
| TBC1D8B | Splice site | chrX:106083277 | c.1354-1G>C | G>C | NM_198881 | TNBC | UPID03 |
| MAP7D3 | Missense | chrX:135328291 | p.M44I | C>G | NM_001173516 | TNBC | UPID03 |
| SPANXN1 | Missense | chrX:144329126 | p.S7I | G>T | NM_001009614 | TNBC | UPID03 |
| REPS2 | Missense | chrX:17153436 | p.P571L | C>T | NM_001080975 | TNBC | UPID03 |
| GK | Missense | chrX:30671724 | p.R24S | C>A | NM_001128127 | TNBC | UPID03 |
| DMD | Missense | chrX:32663089 | p.T373A | T>C | NM_000109 | TNBC | UPID03 |
| GDPD2 | Frameshift | chrX:69649543 | p.R302Pfs*10 | delTGCAAGGG | NM_001171191 | TNBC | UPID03 |
| PRAMEF2 | Missense | chr1:12920093 | p.T278S | C>G | NM_023014 | TNBC | UPID04 |
| LAMC1 | Missense | chr1:183091300 | p.P772R | C>G | NM_002293 | TNBC | UPID04 |
| KCNT2 | Missense | chr1:196285088 | p.T732S | G>C | NM_001287820 | TNBC | UPID04 |
| CACNA1S | Missense | chr1:201009390 | p.S1780L | G>A | NM_000069 | TNBC | UPID04 |
| FCAMR | Frameshift | chr1:207133112 | p.A226Dfs*65 | delCCGAGAG | NM_032029 | TNBC | UPID04 |
| FCAMR | Frameshift | chr1:207133121 | p.M223Kfs*68 | delGCTTTCA | NM_032029 | TNBC | UPID04 |
| G0S2 | Missense | chr1:209849109 | p.Y27C | A>G | NM_015714 | TNBC | UPID04 |
| SYT14 | Missense | chr1:210334312 | p.E531D | A>C | NM_153262 | TNBC | UPID04 |
| DISP1 | Missense | chr1:223178414 | p.K1225N | G>C | NM_001369594 | TNBC | UPID04 |
| THRAP3 | Missense | chr1:36755018 | p.E466D | G>C | NM_001321473 | TNBC | UPID04 |
| PGAM1 | Missense | chr10:99187663 | p.M24I | G>T | NM_001317079 | TNBC | UPID04 |
| OR8H2 | Missense | chr11:55873171 | p.Y218F | A>T | NM_001005200 | TNBC | UPID04 |
| TRIM3 | Missense | chr11:6477385 | p.G365S | C>T | NM_001248007 | TNBC | UPID04 |
| KCNK7 | Missense | chr11:65361231 | p.L145Q | A>T | NM_005714 | TNBC | UPID04 |
| CD248 | Missense | chr11:66082656 | p.A615S | C>A | NM_020404 | TNBC | UPID04 |
| RBM14 | Missense | chr11:66392482 | p.A379T | G>A | NM_006328 | TNBC | UPID04 |
| CHKA | Missense | chr11:67829426 | p.F418L | C>T | NM_212469 | TNBC | UPID04 |
| DENND2B | Missense | chr11:8752671 | p.R56G | T>C | NM_213618 | TNBC | UPID04 |
| ETV6 | Missense | chr12:12022466 | p.R191Q | G>A | NM_001987 | TNBC | UPID04 |
| SLC15A5 | Missense | chr12:16392734 | p.I348S | A>C | NM_001170798 | TNBC | UPID04 |
| OVCH1 | Nonsense | chr12:29644047 | p.W178* | insTT | NM_001353179 | TNBC | UPID04 |
| OR6C76 | Missense | chr12:55820288 | p.T84R | C>G | NM_001005183 | TNBC | UPID04 |
| LHFPL6 | Missense | chr13:40175350 | p.A2T | C>T | NM_005780 | TNBC | UPID04 |
| IGDCC3 | Missense | chr15:65621476 | p.A739V | G>A | NM_004884 | TNBC | UPID04 |
| LOC105370980 | Missense | chr15:93749499 | p.M26T | T>C | NM_001365393 | TNBC | UPID04 |
| BICDL2 | Missense | chr16:3080524 | p.G230C | C>A | NM_001103175 | TNBC | UPID04 |
| BICDL2 | Missense | chr16:3080532 | p.V227G | A>C | NM_001103175 | TNBC | UPID04 |
| CIAO3 | Missense | chr16:784790 | p.R174Q | C>T | NM_022493 | TNBC | UPID04 |
| CLUH | Missense | chr17:2595076 | p.S1256R | G>C | NM_001366661 | TNBC | UPID04 |
| NCBP3 | Missense | chr17:3721824 | p.E348G | T>C | NM_001114118 | TNBC | UPID04 |
| NCBP3 | Missense | chr17:3721831 | p.E346K | C>T | NM_001114118 | TNBC | UPID04 |
| CACNA1G | Missense | chr17:48695586 | p.C1736Y | G>A | NM_198376 | TNBC | UPID04 |
| ANKRD40CL | Missense | chr17:48840902 | p.P32H | G>T | NM_001042544 | TNBC | UPID04 |
| ABCA9 | Missense | chr17:67031886 | p.A286V | G>A | NM_080283 | TNBC | UPID04 |
| ARHGDIA | Missense | chr17:79826273 | p.R328C | G>A | NM_001301242 | TNBC | UPID04 |
| SWSAP1 | Missense | chr19:11486250 | p.H104R | A>G | NM_175871 | TNBC | UPID04 |
| DAZAP1 | Missense | chr19:1434798 | p.P198T | C>A | NM_001352035 | TNBC | UPID04 |
| UQCR11 | Missense | chr19:1605387 | p.P8T | G>T | NM_006830 | TNBC | UPID04 |
| DOT1L | Missense | chr19:2222479 | p.S1104Y | C>A | NM_032482 | TNBC | UPID04 |
| GPATCH1 | Missense | chr19:33602755 | p.H571Y | C>T | NM_018025 | TNBC | UPID04 |
| KMT2B | Missense | chr19:36210883 | p.E212Q | G>C | NM_014727 | TNBC | UPID04 |
| PSENEN | Missense | chr19:36237708 | p.G89A | G>C | NM_001281532 | TNBC | UPID04 |
| RFX2 | Missense | chr19:5997177 | p.G611V | C>A | NM_134433 | TNBC | UPID04 |
| RFX2 | Missense | chr19:6001983 | p.E543K | C>T | NM_134433 | TNBC | UPID04 |
| EVI5L | Missense | chr19:7928582 | p.D793E | C>G | NM_145245 | TNBC | UPID04 |
| OR2Z1 | Missense | chr19:8841851 | p.L154H | T>A | NM_001004699 | TNBC | UPID04 |
| MUC16 | Missense | chr19:9006760 | p.G13163A | C>G | NM_024690 | TNBC | UPID04 |
| ARID3A | Missense | chr19:972037 | p.T585K | C>A | NM_005224 | TNBC | UPID04 |
| KIAA2012 | Missense | chr2:202939721 | p.F64L | C>G | NM_001277372 | TNBC | UPID04 |
| SLC4A3 | Splice site | chr2:220498181 | c.1542+2T>C | T>C | NM_001326559 | TNBC | UPID04 |
| DGKD | Splice site | chr2:234375851 | c.3424+2T>G | T>G | NM_152879 | TNBC | UPID04 |
| HADHA | Missense | chr2:26459738 | p.A100G | G>C | NM_000182 | TNBC | UPID04 |
| IFT172 | Missense | chr2:27706460 | p.S157T | A>T | NM_015662 | TNBC | UPID04 |
| BIRC6 | Missense | chr2:32740530 | p.D3681A | A>C | NM_016252 | TNBC | UPID04 |
| EPAS1 | Missense | chr2:46607430 | p.F540C | T>G | NM_001430 | TNBC | UPID04 |
| PNPT1 | Missense | chr2:55889142 | p.F399C | A>C | NM_033109 | TNBC | UPID04 |
| CCT4 | Missense | chr2:62106076 | p.D120E | G>T | NM_001256721 | TNBC | UPID04 |
| SEL1L2 | Missense | chr20:13839927 | p.H600P | T>G | NM_025229 | TNBC | UPID04 |
| STK35 | Frameshift | chr20:2083893 | p.Q259Rfs*16 | delC | NM_080836 | TNBC | UPID04 |
| ITCH | Missense | chr20:33001625 | p.L29V | C>G | NM_001257138 | TNBC | UPID04 |
| SOX18 | Missense | chr20:62680315 | p.G120D | C>T | NM_018419 | TNBC | UPID04 |
| VPREB1 | Nonsense | chr22:22599215 | p.M1? | AT>GC | NM_001303509 | TNBC | UPID04 |
| EWSR1 | Missense | chr22:29695838 | p.D587A | A>C | NM_001163286 | TNBC | UPID04 |
| INPP5J | Missense | chr22:31524205 | p.N200K | C>G | NM_001284287 | TNBC | UPID04 |
| FANCD2 | Splice site | chr3:10088408 | c.1278+1G>A | G>A | NM_001374253 | TNBC | UPID04 |
| TOPBP1 | Missense | chr3:133377917 | p.D54E | A>T | NM_001363889 | TNBC | UPID04 |
| FOXL2 | Missense | chr3:138665032 | p.V178A | A>G | NM_023067 | TNBC | UPID04 |
| GPR160 | Missense | chr3:169802139 | p.T127P | A>C | NM_014373 | TNBC | UPID04 |
| PSMD2 | Nonsense | chr3:184018110 | p.R79* | C>T | NM_002808 | TNBC | UPID04 |
| NGLY1 | Nonsense | chr3:25773830 | p.R451* | G>A | NM_001145293 | TNBC | UPID04 |
| CTNNB1 | Frameshift | chr3:41267063 | p.G245Vfs*31 | delGGTAAGAAAACATGTCAGAATGCTTGAAGCTAAAAAGTAGAAGAGTATACTCACAATATTTCTGATGAGGCTTTTTTCTTCTTCCCA | NM_001098209 | TNBC | UPID04 |
| CTNNB1 | Frameshift | chr3:41274934 | p.Q395Rfs*18 | delAGGTAAATTCTGAGTAAACTGGTGCCATGGGAATAGAGTCAAGATGAGTATGTGCTTGTACTGACCATCTGTTTTTATCTCCAT | NM_001098209 | TNBC | UPID04 |
| CACNA1D | Missense | chr3:53766872 | p.D835G | A>G | NM_001128839 | TNBC | UPID04 |
| CHMP2B | Missense | chr3:87295002 | p.T48S | A>T | NM_001244644 | TNBC | UPID04 |
| MAD2L1 | Missense | chr4:120983160 | p.I104T | A>G | NM_002358 | TNBC | UPID04 |
| SLCO4C1 | Missense | chr5:101597703 | p.G312R | C>T | NM_180991 | TNBC | UPID04 |
| CDHR2 | Missense | chr5:176005572 | p.V594A | T>C | NM_001171976 | TNBC | UPID04 |
| CAST | Missense | chr5:96098059 | p.P515T | C>A | NM_001042446 | TNBC | UPID04 |
| SCAF8 | Missense | chr6:155153343 | p.P955R | C>G | NM_001286188 | TNBC | UPID04 |
| PGC | Missense | chr6:41708717 | p.A315G | G>C | NM_001166424 | TNBC | UPID04 |
| MEP1A | Missense | chr6:46793039 | p.D196G | A>G | NM_005588 | TNBC | UPID04 |
| COL21A1 | Missense | chr6:56044406 | p.R204W | T>A | NM_001318752 | TNBC | UPID04 |
| MDN1 | Missense | chr6:90426445 | p.E2223K | C>T | NM_014611 | TNBC | UPID04 |
| UFL1 | Nonsense | chr6:96990819 | p.Y443* | C>A | NM_015323 | TNBC | UPID04 |
| CLDN3 | Missense | chr7:73183899 | p.A161T | C>T | NM_001306 | TNBC | UPID04 |
| MICU3 | Missense | chr8:16944525 | p.E271A | A>C | NM_001349810 | TNBC | UPID04 |
| OR13C3 | Missense | chr9:107298787 | p.Y103F | T>A | NM_001001961 | TNBC | UPID04 |
| TMEM38B | Missense | chr9:108510365 | p.V185G | T>G | NM_018112 | TNBC | UPID04 |
| TMEM245 | Missense | chr9:111822732 | p.L542F | G>A | NM_032012 | TNBC | UPID04 |
| TTC16 | Missense | chr9:130493029 | p.S643L | C>T | NM_001317037 | TNBC | UPID04 |
| NOXA1 | Splice site | chr9:140328532 | c.1294+1G>A | G>A | NM_006647 | TNBC | UPID04 |
| DENND4C | Missense | chr9:19372043 | p.D1868H | G>C | NM_017925 | TNBC | UPID04 |
| TRPM3 | Missense | chr9:73376605 | p.V395A | A>G | NM_001007471 | TNBC | UPID04 |
| PCSK5 | Missense | chr9:78965839 | p.G1661R | G>A | NM_001190482 | TNBC | UPID04 |
| BICD2 | Missense | chr9:95480853 | p.T692S | T>A | NM_001003800 | TNBC | UPID04 |
| AMOT | Missense | chrX:112022690 | p.A898T | C>T | NM_001113490 | TNBC | UPID04 |
| MXRA5 | Missense | chrX:3235192 | p.R2177H | C>T | NM_015419 | TNBC | UPID04 |
| HEPH | Missense | chrX:65418747 | p.L584V | C>G | NM_014799 | TNBC | UPID04 |
| ELAPOR1 | Missense | chr1:109732258 | p.S127P | T>C | NM_001284353 | TNBC | UPID05 |
| LIX1L | Missense | chr1:145498121 | p.Q238E | C>G | NM_153713 | TNBC | UPID05 |
| ADAMTS4 | Missense | chr1:161168183 | p.A79P | C>G | NM_001320336 | TNBC | UPID05 |
| XCL1 | Missense | chr1:168549368 | p.S43R | C>G | NM_002995 | TNBC | UPID05 |
| TNN | Missense | chr1:175092753 | p.Q956H | G>C | NM_022093 | TNBC | UPID05 |
| DNAH14 | Missense | chr1:225211529 | p.M440I | G>A | NM_001145154 | TNBC | UPID05 |
| MYCL | Missense | chr1:40366613 | p.S165L | G>A | NM_001033081 | TNBC | UPID05 |
| MYCL | Missense | chr1:40366617 | p.D164N | C>T | NM_001033081 | TNBC | UPID05 |
| LRRC7 | Missense | chr1:70226024 | p.R85Q | G>A | NM_001350216 | TNBC | UPID05 |
| ABCA4 | Missense | chr1:94508433 | p.S1071L | G>A | NM_000350 | TNBC | UPID05 |
| PARD3 | Nonsense | chr10:34805961 | p.Q117* | G>A | NM_001184785 | TNBC | UPID05 |
| ZNF37A | Missense | chr10:38407367 | p.L430V | C>G | NM_001178101 | TNBC | UPID05 |
| DRGX | Missense | chr10:50594897 | p.F81S | A>G | NM_001276451 | TNBC | UPID05 |
| CFAP300 | Missense | chr11:101946625 | p.R97K | G>A | NM_001195005 | TNBC | UPID05 |
| SIK2 | Missense | chr11:111487063 | p.H78N | C>A | NM_015191 | TNBC | UPID05 |
| INPPL1 | Missense | chr11:71942598 | p.H518Q | C>A | NM_001567 | TNBC | UPID05 |
| FZD4 | Missense | chr11:86663443 | p.G119R | C>G | NM_012193 | TNBC | UPID05 |
| PARPBP | Missense | chr12:102572496 | p.D297N | G>A | NM_001319994 | TNBC | UPID05 |
| TFCP2 | Nonsense | chr12:51497522 | p.Q280* | G>A | NM_001173453 | TNBC | UPID05 |
| CEP290 | Nonsense | chr12:88479860 | p.R1465* | G>A | NM_025114 | TNBC | UPID05 |
| TMCC3 | Nonsense | chr12:94972259 | p.Q317* | G>A | NM_001301036 | TNBC | UPID05 |
| APAF1 | Missense | chr12:99042555 | p.S97F | C>T | NM_001160 | TNBC | UPID05 |
| POGLUT2 | Missense | chr13:103438588 | p.R495S | C>A | NM_024089 | TNBC | UPID05 |
| TUBA3C | Missense | chr13:19752506 | p.Q85H | C>A | NM_006001 | TNBC | UPID05 |
| POLR1D | Missense | chr13:28197043 | p.E20K | G>A | NM_015972 | TNBC | UPID05 |
| PDS5B | Missense | chr13:33262651 | p.E472Q | G>C | NM_015032 | TNBC | UPID05 |
| KL | Missense | chr13:33635323 | p.L703V | C>G | NM_004795 | TNBC | UPID05 |
| NBEA | Missense | chr13:36158167 | p.V183I | G>A | NM_001204197 | TNBC | UPID05 |
| BAZ1A | Missense | chr14:35242862 | p.K991R | T>C | NM_182648 | TNBC | UPID05 |
| PNMA1 | Missense | chr14:74179866 | p.K159N | C>G | NM_006029 | TNBC | UPID05 |
| TUBGCP5 | Missense | chr15:22833576 | p.D18N | G>A | NM_001102610 | TNBC | UPID05 |
| SCG3 | Missense | chr15:51975557 | p.V108A | T>C | NM_013243 | TNBC | UPID05 |
| C2CD4A | Frameshift | chr15:62360593 | p.E262Sfs*91 | delGCCGAGTACTGTCCGGGAACCGGGCGGCTCCGCCTCCGGCTGCTCCGCGCCGAGAGCCCGGCCGGAGGCGCCCCCGGGCCCCGAGCCGTCAGCTGTCGCCTCA | NM_207322 | TNBC | UPID05 |
| UBN1 | Missense | chr16:4924612 | p.S734L | C>T | NM_001079514 | TNBC | UPID05 |
| C16orf70 | Missense | chr16:67166422 | p.P89S | C>T | NM_001320543 | TNBC | UPID05 |
| FBXL8 | Missense | chr16:67197643 | p.A349T | G>A | NM_018378 | TNBC | UPID05 |
| NOL3 | Missense | chr16:67208217 | p.D49N | G>A | NM_001185057 | TNBC | UPID05 |
| THAP11 | Missense | chr16:67877116 | p.A220D | C>A | NM_020457 | TNBC | UPID05 |
| NFATC3 | Missense | chr16:68224764 | p.S731C | C>G | NM_004555 | TNBC | UPID05 |
| ADAMTS18 | Missense | chr16:77325351 | p.V900L | C>A | NM_001326358 | TNBC | UPID05 |
| DNAH9 | Missense | chr17:11725241 | p.E2904D | G>C | NM_001372 | TNBC | UPID05 |
| FLII | Nonsense | chr17:18148553 | p.E1226* | C>A | NM_001256265 | TNBC | UPID05 |
| STARD3 | Missense | chr17:37816473 | p.D251N | G>A | NM_001165938 | TNBC | UPID05 |
| FAM171A2 | Missense | chr17:42433707 | p.W204C | C>G | NM_198475 | TNBC | UPID05 |
| PITPNM3 | Nonsense | chr17:6406850 | p.Q55* | G>A | NM_001165966 | TNBC | UPID05 |
| MFSD11 | Frameshift | chr17:74750156 | p.V172Cfs*3 | delAGTAG | NM_001242536 | TNBC | UPID05 |
| TP53 | Missense | chr17:7578403 | C137Y | C>T | NM_001276760 | TNBC | UPID05 |
| RBBP8 | Nonsense | chr18:20573564 | p.E592* | G>T | NM_002894 | TNBC | UPID05 |
| CABYR | Missense | chr18:21739909 | p.E241K | G>A | NM_138643 | TNBC | UPID05 |
| PPAN | Missense | chr19:10217265 | p.R36Q | G>A | NM_001346139 | TNBC | UPID05 |
| KIR2DS1 | Missense | chr19:118854 | p.L111V | T>G | NM_014512 | TNBC | UPID05 |
| CLEC17A | Missense | chr19:14698491 | p.P63S | C>T | NM_001204118 | TNBC | UPID05 |
| NIBAN3 | Missense | chr19:17662610 | p.A553G | C>G | NM_001363609 | TNBC | UPID05 |
| CAPN12 | Missense | chr19:39226159 | p.D537Y | C>A | NM_144691 | TNBC | UPID05 |
| ZNF574 | Missense | chr19:42583038 | p.H184Y | C>T | NM_001330519 | TNBC | UPID05 |
| CD177 | Missense | chr19:43858401 | p.A79V | C>T | NM_020406 | TNBC | UPID05 |
| DMPK | Missense | chr19:46275060 | p.A402T | C>T | NM_001288765 | TNBC | UPID05 |
| DACT3 | Missense | chr19:47155982 | p.S145Y | G>T | NM_145056 | TNBC | UPID05 |
| FKRP | Missense | chr19:47259275 | p.R190C | C>T | NM_001039885 | TNBC | UPID05 |
| SYT3 | Missense | chr19:51140530 | p.P47S | G>A | NM_032298 | TNBC | UPID05 |
| ZNF83 | Missense | chr19:53117382 | p.E146K | C>T | NM_001277951 | TNBC | UPID05 |
| ZNF816 | Missense | chr19:53454652 | p.E126K | C>T | NM_001202456 | TNBC | UPID05 |
| CCDC106 | Missense | chr19:56164099 | p.R242H | G>A | NM_001370471 | TNBC | UPID05 |
| USP29 | Missense | chr19:57641066 | p.F341L | C>A | NM_020903 | TNBC | UPID05 |
| MAP2K7 | Missense | chr19:7976324 | p.E321Q | G>C | NM_001297556 | TNBC | UPID05 |
| CCL20 | Nonsense | chr2:228681799 | p.*96Y | A>C | NM_001130046 | TNBC | UPID05 |
| KIF1A | Missense | chr2:241685545 | p.S946C | G>C | NM_001320705 | TNBC | UPID05 |
| C2orf16 | Missense | chr2:27802149 | p.E904K | G>A | NM_032266 | TNBC | UPID05 |
| MTA3 | Missense | chr2:42922935 | p.E245Q | G>C | NM_001330444 | TNBC | UPID05 |
| PPM1B | Missense | chr2:44436463 | p.E34K | G>A | NM_177969 | TNBC | UPID05 |
| EPAS1 | Missense | chr2:46605192 | p.P470L | C>T | NM_001430 | TNBC | UPID05 |
| PROKR1 | Missense | chr2:68882137 | p.T204M | C>T | NM_138964 | TNBC | UPID05 |
| NFU1 | Missense | chr2:69659057 | p.L48R | A>C | NM_001002755 | TNBC | UPID05 |
| CPSF3 | Missense | chr2:9613072 | p.D624H | G>C | NM_001321833 | TNBC | UPID05 |
| STK35 | Missense | chr20:2083709 | p.S197F | C>T | NM_080836 | TNBC | UPID05 |
| AAR2 | Missense | chr20:34832790 | p.P310L | C>T | NM_001271874 | TNBC | UPID05 |
| RBCK1 | Nonsense | chr20:398535 | p.Q99* | C>T | NM_006462 | TNBC | UPID05 |
| CSE1L | Missense | chr20:47711330 | p.D830N | G>A | NM_001256135 | TNBC | UPID05 |
| PHACTR3 | Missense | chr20:58342408 | p.P234S | C>T | NM_001199505 | TNBC | UPID05 |
| HSCB | Missense | chr22:29139889 | p.D86H | G>C | NM_001318314 | TNBC | UPID05 |
| HSCB | Missense | chr22:29141958 | p.S177N | G>A | NM_001318316 | TNBC | UPID05 |
| NEFH | Missense | chr22:29885211 | p.A528T | G>A | NM_021076 | TNBC | UPID05 |
| CELSR1 | Frameshift | chr22:46930253 | p.G939Vfs*42 | insA | NM_014246 | TNBC | UPID05 |
| IMPG2 | Missense | chr3:100976460 | p.D356N | C>T | NM_016247 | TNBC | UPID05 |
| PLXNA1 | Missense | chr3:126708202 | p.V256I | G>A | NM_032242 | TNBC | UPID05 |
| RHO | Missense | chr3:129251418 | p.E247K | G>A | NM_000539 | TNBC | UPID05 |
| NLGN1 | Missense | chr3:173998623 | p.D668N | G>A | NM_001365929 | TNBC | UPID05 |
| PSMD2 | Nonsense | chr3:184025217 | p.R703* | C>T | NM_001278708 | TNBC | UPID05 |
| PCYT1A | Missense | chr3:195997359 | p.R15K | C>T | NM_001312673 | TNBC | UPID05 |
| FREM3 | Missense | chr4:144621006 | p.E275Q | C>G | NM_001168235 | TNBC | UPID05 |
| MOB1B | Missense | chr4:71840923 | p.S110C | C>G | NM_001244767 | TNBC | UPID05 |
| FCHSD1 | Missense | chr5:141024164 | p.N540D | T>C | NM_033449 | TNBC | UPID05 |
| SH3TC2 | Missense | chr5:148408269 | p.S383Y | G>T | NM_024577 | TNBC | UPID05 |
| CDH10 | Missense | chr5:24488007 | p.R117Q | C>T | NM_001317222 | TNBC | UPID05 |
| PPWD1 | Missense | chr5:64883089 | p.D447N | G>A | NM_001278929 | TNBC | UPID05 |
| ZFYVE16 | Missense | chr5:79732811 | p.L103F | C>T | NM_001284237 | TNBC | UPID05 |
| PRDM1 | Missense | chr6:106552908 | p.M157I | G>A | NM_182907 | TNBC | UPID05 |
| CEP57L1 | Missense | chr6:109484018 | p.D410N | G>A | NM_173830 | TNBC | UPID05 |
| OPRM1 | Missense | chr6:154428688 | p.G418E | G>A | NM_001145286 | TNBC | UPID05 |
| TTLL2 | Nonsense | chr6:167754977 | p.S530* | C>A | NM_031949 | TNBC | UPID05 |
| CARMIL1 | Missense | chr6:25488800 | p.G351V | G>T | NM_001173977 | TNBC | UPID05 |
| DUSP22 | Missense | chr6:348808 | p.L159V | T>G | NM_001286555 | TNBC | UPID05 |
| DSP | Frameshift | chr6:7581545 | p.L1709Hfs*24 | delTC | NM_004415 | TNBC | UPID05 |
| IMPG1 | Missense | chr6:76713635 | p.D312N | C>T | NM_001282368 | TNBC | UPID05 |
| SH3BGRL2 | Missense | chr6:80383410 | p.S42L | C>T | NM_031469 | TNBC | UPID05 |
| CASP8AP2 | Missense | chr6:90574051 | p.S875C | A>T | NM_001137667 | TNBC | UPID05 |
| LRCH4 | Missense | chr7:100183650 | p.S25F | G>A | NM_001289934 | TNBC | UPID05 |
| ACTL6B | Missense | chr7:100252644 | p.P123A | G>C | NM_016188 | TNBC | UPID05 |
| SLC12A9 | Missense | chr7:100459089 | p.I330M | C>G | NM_001363494 | TNBC | UPID05 |
| MUC12 | Missense | chr7:100643862 | p.H3340Y | C>T | NM_001164462 | TNBC | UPID05 |
| MET | Missense | chr7:116340114 | p.G326R | G>A | NM_000245 | TNBC | UPID05 |
| PCLO | Missense | chr7:82545144 | p.G4053A | C>G | NM_014510 | TNBC | UPID05 |
| PON1 | Missense | chr7:94937361 | p.F220L | A>C | NM_000446 | TNBC | UPID05 |
| VPS13B | Missense | chr8:100479839 | p.E1215Q | G>C | NM_017890 | TNBC | UPID05 |
| CSMD3 | Missense | chr8:113249566 | p.V3294I | C>T | NM_001363185 | TNBC | UPID05 |
| AARD | Missense | chr8:117950690 | p.A70T | G>A | NM_001025357 | TNBC | UPID05 |
| MAPK15 | Nonsense | chr8:144799881 | p.W28* | G>A | NM_139021 | TNBC | UPID05 |
| SPATC1 | Missense | chr8:145101775 | p.G565D | G>A | NM_198572 | TNBC | UPID05 |
| PPP1R16A | Missense | chr8:145726354 | p.G346E | G>A | NM_001329443 | TNBC | UPID05 |
| TEX15 | Missense | chr8:30705618 | p.E689Q | C>G | NM_001350162 | TNBC | UPID05 |
| TEX15 | Missense | chr8:30706308 | p.E459Q | C>G | NM_001350162 | TNBC | UPID05 |
| MOS | Missense | chr8:57025586 | p.R319H | C>T | NM_005372 | TNBC | UPID05 |
| CHD7 | Missense | chr8:61764673 | p.Q1921E | C>G | NM_017780 | TNBC | UPID05 |
| ZFHX4 | Missense | chr8:77617539 | p.V406L | G>T | NM_024721 | TNBC | UPID05 |
| MATN2 | Missense | chr8:98991132 | p.S326L | C>T | NM_001317748 | TNBC | UPID05 |
| LAMC3 | Missense | chr9:133901725 | p.E143Q | G>C | NM_006059 | TNBC | UPID05 |
| MAMDC4 | Missense | chr9:139750234 | p.V508M | G>A | NM_206920 | TNBC | UPID05 |
| C9orf131 | Missense | chr9:35044049 | p.P440S | C>T | NM_001040410 | TNBC | UPID05 |
| SPIN1 | Missense | chr9:91083481 | p.D184N | G>A | NM_006717 | TNBC | UPID05 |
| GUCY2F | Missense | chrX:108652312 | p.C626Y | C>T | NM_001522 | TNBC | UPID05 |
| BRCC3 | Missense | chrX:154348298 | p.Q251P | A>C | NM_001242640 | TNBC | UPID05 |
| SUPT20HL2 | Missense | chrX:24329035 | p.G826R | C>T | NM_001136233 | TNBC | UPID05 |
| HEPH | Nonsense | chrX:65390467 | p.Q22* | C>T | NM_001130860 | TNBC | UPID05 |
| PCDH19 | Missense | chrX:99661771 | p.E609K | C>T | NM_001105243 | TNBC | UPID05 |
| APH1A | Splice site | chr1:150240191 | c.114-2A>C | T>G | NM_001243771 | TNBC | UPID06 |
| ARHGEF19 | Nonsense | chr1:16533694 | p.Q296* | G>A | NM_153213 | TNBC | UPID06 |
| KIAA1522 | Frameshift | chr1:33235387 | p.G175Afs*2 | delGGTGAGGCCTGGGTTAGGAGGGCAGTGGTGGGGTGGGTGGGGAGCCTTGGTCATCCCCTCTCTGCTGACCCCACCTCCTCCCTGTCCCTTCCA | NM_001198972 | TNBC | UPID06 |
| NCAM1 | Missense | chr11:113078701 | p.A298V | C>T | NM_000615 | TNBC | UPID06 |
| CCDC15 | Nonsense | chr11:124857524 | p.Q468* | C>T | NM_025004 | TNBC | UPID06 |
| ELF5 | Missense | chr11:34501799 | p.K150I | T>A | NM_001243080 | TNBC | UPID06 |
| CCDC88B | Missense | chr11:64108125 | p.G36A | G>C | NM_032251 | TNBC | UPID06 |
| LRRC43 | Missense | chr12:122685387 | p.L572P | T>C | NM_001098519 | TNBC | UPID06 |
| FAM186A | Missense | chr12:50748958 | p.E553Q | C>G | NM_001145475 | TNBC | UPID06 |
| EEA1 | Missense | chr12:93181742 | p.L1017F | T>A | NM_003566 | TNBC | UPID06 |
| CCDC38 | Missense | chr12:96288809 | p.S244A | A>C | NM_182496 | TNBC | UPID06 |
| KATNAL1 | Nonsense | chr13:30829724 | p.R118* | G>A | NM_001014380 | TNBC | UPID06 |
| ZFHX2 | Missense | chr14:24004530 | p.A2V | G>A | NM_033400 | TNBC | UPID06 |
| ISM2 | Missense | chr14:77951201 | p.R68T | C>G | NM_182509 | TNBC | UPID06 |
| SLC12A6 | Missense | chr15:34537904 | p.P590L | G>A | NM_001042497 | TNBC | UPID06 |
| IQGAP1 | Frameshift | chr15:90931628 | p.V39Lfs*40 | insCTGTCCTGGATAATGAAAGACTTACTGCAGAGGAGATGGATGAAAGGAGACGTCAGAAC | NM_003870 | TNBC | UPID06 |
| BAIAP3 | Missense | chr16:1392748 | p.R329Q | G>A | NM_001199096 | TNBC | UPID06 |
| FLII | Missense | chr17:18157913 | p.L155Q | A>T | NM_001256264 | TNBC | UPID06 |
| BPTF | Missense | chr17:65971899 | p.M2851V | A>G | NM_182641 | TNBC | UPID06 |
| GGA3 | Missense | chr17:73235961 | p.P376T | G>T | NM_001291642 | TNBC | UPID06 |
| FASN | Missense | chr17:80043572 | p.A1303V | G>A | NM_004104 | TNBC | UPID06 |
| CCDC57 | Missense | chr17:80115820 | p.L190P | A>G | NM_001367828 | TNBC | UPID06 |
| CACNA1A | Missense | chr19:13338336 | p.R1845H | C>T | NM_001127222 | TNBC | UPID06 |
| ILVBL | Missense | chr19:15227319 | p.F401V | A>C | NM_006844 | TNBC | UPID06 |
| APOE | Nonsense | chr19:45411148 | p.Q59* | C>T | NM_000041 | TNBC | UPID06 |
| QPCTL | Splice site | chr19:46196669 | c.208-2A>T | A>T | NM_001163377 | TNBC | UPID06 |
| CCDC114 | Missense | chr19:48823556 | p.V24L | C>A | NM_001364171 | TNBC | UPID06 |
| THADA | Missense | chr2:43797544 | p.S724T | A>T | NM_001083953 | TNBC | UPID06 |
| RPN2 | Missense | chr20:35828859 | p.W163C | G>T | NM_001324301 | TNBC | UPID06 |
| CTCFL | Missense | chr20:56078581 | p.T322K | G>T | NM_001269054 | TNBC | UPID06 |
| VPREB1 | Nonsense | chr22:22599215 | p.M1? | AT>GC | NM_001303509 | TNBC | UPID06 |
| EIF4A2 | Missense | chr3:186502417 | p.G47D | G>A | NM_001967 | TNBC | UPID06 |
| CTNNB1 | Missense | chr3:41266935 | p.M202I | G>A | NM_001098209 | TNBC | UPID06 |
| CTNNB1 | Frameshift | chr3:41267063 | p.G245Vfs*31 | delGGTAAGAAAACATGTCAGAATGCTTGAAGCTAAAAAGTAGAAGAGTATACTCACAATATTTCTGATGAGGCTTTTTTCTTCTTCCCA | NM_001098209 | TNBC | UPID06 |
| RNF123 | Missense | chr3:49739296 | p.R483Q | G>A | NM_022064 | TNBC | UPID06 |
| NFXL1 | Nonsense | chr4:47896280 | p.R457* | G>A | NM_001278623 | TNBC | UPID06 |
| NFXL1 | Missense | chr4:47907317 | p.E151D | T>A | NM_001278623 | TNBC | UPID06 |
| AASDH | Missense | chr4:57216049 | p.Y138C | T>C | NM_001286670 | TNBC | UPID06 |
| PSD2 | Missense | chr5:139222022 | p.S760N | G>A | NM_032289 | TNBC | UPID06 |
| CPLANE1 | Missense | chr5:37165642 | p.K2511R | T>C | NM_023073 | TNBC | UPID06 |
| CPLANE1 | Missense | chr5:37165649 | p.K2509E | T>C | NM_023073 | TNBC | UPID06 |
| HEY2 | Nonsense | chr6:126075645 | p.M95* | delA | NM_012259 | TNBC | UPID06 |
| FILIP1 | Missense | chr6:76024347 | p.E401Q | C>G | NM_001300866 | TNBC | UPID06 |
| MUC12 | Missense | chr7:100642528 | p.T2895I | C>T | NM_001164462 | TNBC | UPID06 |
| ASZ1 | Missense | chr7:117008769 | p.G145D | C>T | NM_001301822 | TNBC | UPID06 |
| SLC24A2 | Splice site | chr9:19577021 | c.1079-1G>T | C>A | NM_001375851 | TNBC | UPID06 |
| AFF2 | Missense | chrX:148044390 | p.T913A | A>G | NM_001170628 | TNBC | UPID06 |
| SLC6A8 | Missense | chrX:152960321 | p.R572G | A>G | NM_001142805 | TNBC | UPID06 |
| EDA2R | Missense | chrX:65819643 | p.P69S | G>A | NM_001324199 | TNBC | UPID06 |
| ZNF711 | Missense | chrX:84523314 | p.V311F | G>T | NM_021998 | TNBC | UPID06 |
| COL11A1 | Missense | chr1:103444442 | p.G779R | C>G | NM_080630 | TNBC | UPID07 |
| RABGAP1L | Missense | chr1:174210730 | p.T181A | A>G | NM_001366445 | TNBC | UPID07 |
| ASPM | Missense | chr1:197087112 | p.E1291G | T>C | NM_001206846 | TNBC | UPID07 |
| NFASC | Missense | chr1:204957892 | p.G905R | G>A | NM_001365986 | TNBC | UPID07 |
| DSTYK | Missense | chr1:205126418 | p.K779Q | T>G | NM_015375 | TNBC | UPID07 |
| YOD1 | Nonsense | chr1:207222713 | p.*233W | T>C | NM_018566 | TNBC | UPID07 |
| OR2G2 | Missense | chr1:247751911 | p.L84I | C>A | NM_001001915 | TNBC | UPID07 |
| CCDC17 | Missense | chr1:46088966 | p.R139Q | C>T | NM_001114938 | TNBC | UPID07 |
| DMRTA2 | Missense | chr1:50884948 | p.G340C | C>A | NM_032110 | TNBC | UPID07 |
| PODN | Missense | chr1:53544108 | p.R309L | G>T | NM_153703 | TNBC | UPID07 |
| PWWP2B | Missense | chr10:134218597 | p.P198L | C>T | NM_001098637 | TNBC | UPID07 |
| ANK3 | Missense | chr10:61835438 | p.G1734A | C>G | NM_020987 | TNBC | UPID07 |
| SEC24C | Missense | chr10:75526812 | p.A632T | G>A | NM_198597 | TNBC | UPID07 |
| BCL9L | Missense | chr11:118772498 | p.F652V | A>C | NM_182557 | TNBC | UPID07 |
| LDHC | Missense | chr11:18436807 | p.G68D | G>A | NM_002301 | TNBC | UPID07 |
| PTPN6 | Missense | chr12:7069256 | p.D479N | G>A | NM_002831 | TNBC | UPID07 |
| OTOGL | Missense | chr12:80729839 | p.V1453L | G>T | NM_001368062 | TNBC | UPID07 |
| IKBIP | Nonsense | chr12:99038473 | p.E3* | C>A | NM_153687 | TNBC | UPID07 |
| BRCA2 | Frameshift | chr13:32913374 | p.K1628Nfs*10 | delAA | NM_000059 | TNBC | UPID07 |
| TRPC4 | Missense | chr13:38211543 | p.A638T | C>T | NM_001135958 | TNBC | UPID07 |
| KIF26A | Missense | chr14:104644011 | p.H1629R | A>G | NM_015656 | TNBC | UPID07 |
| SLC7A8 | Missense | chr14:23612372 | p.T79P | T>G | NM_001267036 | TNBC | UPID07 |
| BMP4 | Missense | chr14:54418879 | p.A21V | G>A | NM_001347914 | TNBC | UPID07 |
| SEL1L | Missense | chr14:82000051 | p.A13V | G>A | NM_001244984 | TNBC | UPID07 |
| STARD9 | Missense | chr15:42980094 | p.N2106K | C>G | NM_020759 | TNBC | UPID07 |
| CHRNB4 | Missense | chr15:78921959 | p.R230S | G>T | NM_000750 | TNBC | UPID07 |
| ITFG1 | Missense | chr16:47485318 | p.I70M | T>C | NM_001305002 | TNBC | UPID07 |
| C16orf86 | Missense | chr16:67702438 | p.I297V | A>G | NM_001012984 | TNBC | UPID07 |
| PLCG2 | Missense | chr16:81969957 | p.M1009T | T>C | NM_002661 | TNBC | UPID07 |
| FOXC2 | Missense | chr16:86601408 | p.F156Y | T>A | NM_005251 | TNBC | UPID07 |
| JPH3 | Missense | chr16:87723680 | p.R572W | C>T | NM_020655 | TNBC | UPID07 |
| MAP2K4 | Splice site | chr17:12043203 | c.1119+2T>G | T>G | NM_001281435 | TNBC | UPID07 |
| UBB | Missense | chr17:16285497 | p.E92D | A>T | NM_001281716 | TNBC | UPID07 |
| PSMD12 | Missense | chr17:65340770 | p.E325D | C>G | NM_174871 | TNBC | UPID07 |
| WDR7 | Missense | chr18:54424319 | p.T832N | C>A | NM_015285 | TNBC | UPID07 |
| ZCCHC2 | Missense | chr18:60231829 | p.S571Y | C>A | NM_017742 | TNBC | UPID07 |
| WTIP | Nonsense | chr19:34991174 | p.*431W | A>G | NM_001080436 | TNBC | UPID07 |
| ACTN4 | Missense | chr19:39217672 | p.T756A | A>G | NM_001322033 | TNBC | UPID07 |
| SARS2 | Missense | chr19:39406338 | p.R489W | G>A | NM_017827 | TNBC | UPID07 |
| HNRNPM | Missense | chr19:8551173 | p.R486G | C>G | NM_001297418 | TNBC | UPID07 |
| ARHGEF4 | Missense | chr2:131674830 | p.M1104T | T>C | NM_001367493 | TNBC | UPID07 |
| LYPD6 | Splice site | chr2:150305662 | c.217+1G>C | G>C | NM_001195685 | TNBC | UPID07 |
| GPD2 | Missense | chr2:157367383 | p.G117V | G>T | NM_000408 | TNBC | UPID07 |
| SGO2 | Missense | chr2:201436565 | p.E499V | A>T | NM_001160033 | TNBC | UPID07 |
| PTPRN | Missense | chr2:220167080 | p.G258A | C>G | NM_001199763 | TNBC | UPID07 |
| AGAP1 | Missense | chr2:236877190 | p.H470P | A>C | NM_014914 | TNBC | UPID07 |
| PPP3R1 | Missense | chr2:68444253 | p.A5E | G>T | NM_000945 | TNBC | UPID07 |
| FOXI3 | Missense | chr2:88747976 | p.R337H | C>T | NM_001135649 | TNBC | UPID07 |
| RBM38 | Missense | chr20:55967770 | p.D100Y | G>T | NM_017495 | TNBC | UPID07 |
| APOBEC3G | Missense | chr22:39477172 | p.R69S | C>A | NM_001349437 | TNBC | UPID07 |
| SUMF1 | Missense | chr3:4459740 | p.T202P | T>G | NM_001164674 | TNBC | UPID07 |
| ZMYND10 | Missense | chr3:50379984 | p.F234L | G>T | NM_001308379 | TNBC | UPID07 |
| TLR2 | Missense | chr4:154626031 | p.L658V | C>G | NM_001318789 | TNBC | UPID07 |
| ENAM | Missense | chr4:71510216 | p.D807H | G>C | NM_001368133 | TNBC | UPID07 |
| TRIM36 | Splice site | chr5:114506920 | c.64-1G>T | C>A | NM_001017397 | TNBC | UPID07 |
| LVRN | Missense | chr5:115329523 | p.I449S | T>G | NM_173800 | TNBC | UPID07 |
| ZNF300 | Missense | chr5:150278089 | p.V15M | C>T | NM_052860 | TNBC | UPID07 |
| PIK3R1 | Frameshift | chr5:67588139 | p.N54Kfs*9 | insA | NM_181504 | TNBC | UPID07 |
| ECHDC1 | Missense | chr6:127611188 | p.K169N | C>G | NM_001105544 | TNBC | UPID07 |
| JARID2 | Missense | chr6:15468879 | p.N28K | C>A | NM_001267040 | TNBC | UPID07 |
| DACT2 | Missense | chr6:168711010 | p.K166E | T>C | NM_001286351 | TNBC | UPID07 |
| FAM50B | Missense | chr6:3850987 | p.D314E | C>G | NM_012135 | TNBC | UPID07 |
| DNAH8 | Missense | chr6:38874094 | p.G2870R | G>A | NM_001371 | TNBC | UPID07 |
| CD109 | Missense | chr6:74516767 | p.T977I | C>T | NM_001159588 | TNBC | UPID07 |
| MDN1 | Missense | chr6:90382326 | p.E4524Q | C>G | NM_014611 | TNBC | UPID07 |
| ZFAND2A | Missense | chr7:1192739 | p.R104K | C>T | NM_001365381 | TNBC | UPID07 |
| TRPV5 | Missense | chr7:142609740 | p.A566S | C>A | NM_019841 | TNBC | UPID07 |
| ANKMY2 | Missense | chr7:16650355 | p.T189A | T>C | NM_020319 | TNBC | UPID07 |
| OSBPL3 | Frameshift | chr7:24905728 | p.D170Lfs*64 | delGTCT | NM_145320 | TNBC | UPID07 |
| POLM | Missense | chr7:44112739 | p.Q483H | C>G | NM_001284330 | TNBC | UPID07 |
| CRCP | Splice site | chr7:65595830 | c.144+1G>T | G>T | NM_014478 | TNBC | UPID07 |
| DBF4 | Missense | chr7:87536783 | p.I211V | A>G | NM_001318060 | TNBC | UPID07 |
| ZNF804B | Missense | chr7:88964467 | p.S724I | G>T | NM_181646 | TNBC | UPID07 |
| COL1A2 | Missense | chr7:94057153 | p.R1161P | G>C | NM_000089 | TNBC | UPID07 |
| TRRAP | Missense | chr7:98565263 | p.T2460N | C>A | NM_003496 | TNBC | UPID07 |
| PSD3 | Missense | chr8:18662272 | p.R57G | G>C | NM_206909 | TNBC | UPID07 |
| ADHFE1 | Missense | chr8:67364339 | p.R296G | A>G | NM_144650 | TNBC | UPID07 |
| ZNF462 | Missense | chr9:109687872 | p.L560Q | T>A | NM_001347997 | TNBC | UPID07 |
| PHF24 | Missense | chr9:34972494 | p.A177V | C>T | NM_001304333 | TNBC | UPID07 |
| CD72 | Missense | chr9:35616101 | p.R176K | C>T | NM_001782 | TNBC | UPID07 |
| KIAA2026 | Missense | chr9:5920286 | p.L1904I | G>T | NM_001017969 | TNBC | UPID07 |
| G6PD | Missense | chrX:153775033 | p.E18G | T>C | NM_000402 | TNBC | UPID07 |
| GPR34 | Missense | chrX:41555887 | p.I334T | T>C | NM_001097579 | TNBC | UPID07 |
| CACNA1F | Missense | chrX:49066410 | p.P1561S | G>A | NM_001256789 | TNBC | UPID07 |
| GSTM5 | Missense | chr1:110257810 | p.P172R | C>G | NM_000851 | TNBC | UPID08 |
| RBM15 | Missense | chr1:110882496 | p.A157T | G>A | NM_001201545 | TNBC | UPID08 |
| WARS2 | Missense | chr1:119619068 | p.H85N | G>T | NM_015836 | TNBC | UPID08 |
| THEM4 | Missense | chr1:151867637 | p.D45H | C>G | NM_053055 | TNBC | UPID08 |
| FLG | Missense | chr1:152285135 | p.S743G | T>C | NM_002016 | TNBC | UPID08 |
| NPR1 | Missense | chr1:153660652 | p.R791K | G>A | NM_000906 | TNBC | UPID08 |
| GON4L | Missense | chr1:155735853 | p.I1137M | G>C | NM_001282856 | TNBC | UPID08 |
| ARHGEF11 | Missense | chr1:156915912 | p.D873Y | C>A | NM_014784 | TNBC | UPID08 |
| HSPA6 | Missense | chr1:161495940 | p.G498R | G>C | NM_002155 | TNBC | UPID08 |
| POU2F1 | Missense | chr1:167367368 | p.E360Q | G>C | NM_001198786 | TNBC | UPID08 |
| TNNI1 | Splice site | chr1:201380484 | c.456+1Gdel | delC | NM_003281 | TNBC | UPID08 |
| IRF6 | Frameshift | chr1:209964182 | p.E141Dfs*22 | delTCTGCCCGTAC | NM_001206696 | TNBC | UPID08 |
| KIF17 | Missense | chr1:21014036 | p.Y595N | A>T | NM_001122819 | TNBC | UPID08 |
| NEK2 | Missense | chr1:211846890 | p.R164G | T>C | NM_001204182 | TNBC | UPID08 |
| CEP170 | Missense | chr1:243327654 | p.A1105G | G>C | NM_001042404 | TNBC | UPID08 |
| OR2T7 | Missense | chr1:248605237 | p.G274R | G>A | NM_001355223 | TNBC | UPID08 |
| ZMYM4 | Nonsense | chr1:35827231 | p.Y227* | C>A | NM_005095 | TNBC | UPID08 |
| CLDN19 | Missense | chr1:43204115 | p.G122V | C>A | NM_001123395 | TNBC | UPID08 |
| ERMAP | Missense | chr1:43296448 | p.G32E | G>A | NM_018538 | TNBC | UPID08 |
| EIF3A | Missense | chr10:120801774 | p.D1086E | G>C | NM_003750 | TNBC | UPID08 |
| MLLT10 | Nonsense | chr10:22016856 | p.R688* | C>T | NM_001195626 | TNBC | UPID08 |
| NRG3 | Missense | chr10:83926571 | p.S50L | C>T | NM_001165973 | TNBC | UPID08 |
| SIDT2 | Missense | chr11:117060740 | p.S498R | A>C | NM_001040455 | TNBC | UPID08 |
| SLC37A4 | Missense | chr11:118898536 | p.T143I | G>A | NM_001164280 | TNBC | UPID08 |
| OR8D4 | Missense | chr11:123777584 | p.F149S | T>C | NM_001005197 | TNBC | UPID08 |
| NELL1 | Missense | chr11:20982046 | p.A357S | G>T | NM_001288714 | TNBC | UPID08 |
| TCP11L1 | Missense | chr11:33090345 | p.V423M | G>A | NM_001145541 | TNBC | UPID08 |
| OR51E1 | Missense | chr11:4674507 | p.F251L | T>C | NM_152430 | TNBC | UPID08 |
| CKAP5 | Missense | chr11:46832698 | p.K163N | C>G | NM_001008938 | TNBC | UPID08 |
| PCNX3 | Missense | chr11:65402488 | p.D1617G | A>G | NM_032223 | TNBC | UPID08 |
| GPR152 | Missense | chr11:67220068 | p.G43V | C>A | NM_206997 | TNBC | UPID08 |
| PDE2A | Missense | chr11:72307647 | p.A153D | G>T | NM_001143839 | TNBC | UPID08 |
| TMEM132D | Missense | chr12:130387860 | p.L9M | G>T | NM_133448 | TNBC | UPID08 |
| POLE | Missense | chr12:133209319 | p.T2023A | T>C | NM_006231 | TNBC | UPID08 |
| ERP27 | Missense | chr12:15087872 | p.G84V | C>A | NM_152321 | TNBC | UPID08 |
| SLCO1C1 | Missense | chr12:20893286 | p.Y455H | T>C | NM_001145944 | TNBC | UPID08 |
| MCF2L | Frameshift | chr13:113733037 | p.L560Afs*30 | delCTGGCCATCCTGCGCAGGTGGGTGCG | NM_001366645 | TNBC | UPID08 |
| MTUS2 | Missense | chr13:29608121 | p.Q769K | C>A | NM_001366650 | TNBC | UPID08 |
| BRCA2 | Nonsense | chr13:32920978 | p.R2318* | C>T | NM_000059 | TNBC | UPID08 |
| ANKRD9 | Missense | chr14:102973862 | p.R122H | C>T | NM_001348652 | TNBC | UPID08 |
| CCNB1IP1 | Missense | chr14:20781863 | p.K132R | T>C | NM_182849 | TNBC | UPID08 |
| SLC7A8 | Missense | chr14:23612372 | p.T79P | T>G | NM_001267036 | TNBC | UPID08 |
| DDHD1 | Missense | chr14:53570448 | p.Q322R | T>C | NM_001160147 | TNBC | UPID08 |
| OCA2 | Nonsense | chr15:28117049 | p.L676* | A>T | NM_001300984 | TNBC | UPID08 |
| RYR3 | Missense | chr15:34078121 | p.I3176N | T>A | NM_001036 | TNBC | UPID08 |
| FAM219B | Missense | chr15:75198638 | p.P95S | G>A | NM_001321920 | TNBC | UPID08 |
| CNTNAP4 | Missense | chr16:76569672 | p.C867R | T>C | NM_001322180 | TNBC | UPID08 |
| HIC1 | Missense | chr17:1961533 | p.P536T | C>A | NM_001098202 | TNBC | UPID08 |
| KRT20 | Missense | chr17:39032624 | p.E422K | C>T | NM_019010 | TNBC | UPID08 |
| CAMTA2 | Missense | chr17:4883762 | p.K287N | C>G | NM_001171166 | TNBC | UPID08 |
| CCDC47 | Missense | chr17:61829463 | p.K403R | T>C | NM_020198 | TNBC | UPID08 |
| POLR2A | Missense | chr17:7412419 | p.S1208P | T>C | NM_000937 | TNBC | UPID08 |
| UBE2O | Missense | chr17:74449088 | p.P46S | G>A | NM_022066 | TNBC | UPID08 |
| TP53 | Missense | chr17:7578442 | p.Y124C | T>C | NM_001276760 | TNBC | UPID08 |
| AATK | Missense | chr17:79096052 | p.D459Y | C>A | NM_004920 | TNBC | UPID08 |
| SERPINB2 | Missense | chr18:61570359 | p.H356Q | C>A | NM_002575 | TNBC | UPID08 |
| ZNF516 | Missense | chr18:74091609 | p.A821T | C>T | NM_014643 | TNBC | UPID08 |
| KIR2DS1 | Missense | chr19:118854 | p.L111V | T>G | NM_014512 | TNBC | UPID08 |
| HAUS8 | Splice site | chr19:17169518 | c.487-1G>C | C>G | NM_033417 | TNBC | UPID08 |
| PDE4C | Missense | chr19:18327576 | p.S256T | C>G | NM_001369701 | TNBC | UPID08 |
| IQCN | Missense | chr19:18375614 | p.N912K | G>T | NM_001145304 | TNBC | UPID08 |
| FKBP8 | Missense | chr19:18650489 | p.P112S | G>A | NM_001308373 | TNBC | UPID08 |
| CRLF1 | Missense | chr19:18710495 | p.A93P | C>G | NM_004750 | TNBC | UPID08 |
| GPI | Missense | chr19:34890921 | p.R525C | C>T | NM_001289790 | TNBC | UPID08 |
| FCGBP | Missense | chr19:40408461 | p.F1460I | A>T | NM_003890 | TNBC | UPID08 |
| GRIK5 | Frameshift | chr19:42506375 | p.D945Vfs*138 | delAGCATCAGGG | NM_001301030 | TNBC | UPID08 |
| FSD1 | Missense | chr19:4307980 | p.Q115H | G>C | NM_001330429 | TNBC | UPID08 |
| EML2 | Missense | chr19:46122375 | p.K283N | C>A | NM_001352051 | TNBC | UPID08 |
| ZNF616 | Missense | chr19:52619228 | p.A397T | C>T | NM_178523 | TNBC | UPID08 |
| LILRA3 | Missense | chr19:54800085 | p.S363R | G>T | NM_001172654 | TNBC | UPID08 |
| LILRA1 | Missense | chr19:55112178 | p.D256H | G>C | NM_001278318 | TNBC | UPID08 |
| PPP6R1 | Missense | chr19:55758396 | p.E26Q | C>G | NM_014931 | TNBC | UPID08 |
| ZIK1 | Missense | chr19:58102403 | p.K305N | G>T | NM_001321147 | TNBC | UPID08 |
| FSTL3 | Missense | chr19:681419 | p.A198T | G>A | NM_005860 | TNBC | UPID08 |
| STXBP2 | Missense | chr19:7706946 | p.A199V | C>T | NM_001127396 | TNBC | UPID08 |
| WDR33 | Missense | chr2:128471506 | p.R987W | T>A | NM_018383 | TNBC | UPID08 |
| TRIB2 | Missense | chr2:12880840 | p.A318T | G>A | NM_021643 | TNBC | UPID08 |
| SCN2A | Missense | chr2:166187974 | p.D762N | G>A | NM_001040142 | TNBC | UPID08 |
| GLS | Missense | chr2:191796356 | p.D548G | A>G | NM_001256310 | TNBC | UPID08 |
| FAM126B | Missense | chr2:201888722 | p.T4I | G>A | NM_001321618 | TNBC | UPID08 |
| MLPH | Missense | chr2:238427244 | p.E170K | G>A | NM_001042467 | TNBC | UPID08 |
| COX7A2L | Missense | chr2:42578463 | p.L78M | G>T | NM_001319037 | TNBC | UPID08 |
| TEX261 | Splice site | chr2:71220824 | c.150+2T>G | A>C | NM_144582 | TNBC | UPID08 |
| DZANK1 | Missense | chr20:18365188 | p.K538R | T>C | NM_018152 | TNBC | UPID08 |
| MYH7B | Missense | chr20:33588424 | p.R1746C | C>T | NM_020884 | TNBC | UPID08 |
| LCA5L | Nonsense | chr21:40777980 | p.S614* | G>T | NM_152505 | TNBC | UPID08 |
| ABCG1 | Frameshift | chr21:43706091 | p.P321Qfs*21 | delC | NM_004915 | TNBC | UPID08 |
| COL6A1 | Missense | chr21:47411946 | p.E381G | A>G | NM_001848 | TNBC | UPID08 |
| SEC14L4 | Splice site | chr22:30890852 | c.519+1G>C | C>G | NM_001161368 | TNBC | UPID08 |
| CSF2RB | Missense | chr22:37334153 | p.E768A | A>C | NM_000395 | TNBC | UPID08 |
| TRIOBP | Missense | chr22:38153876 | p.R269C | C>T | NM_007032 | TNBC | UPID08 |
| DDX17 | Missense | chr22:38895450 | p.V165I | C>T | NM_001098504 | TNBC | UPID08 |
| LMF2 | Missense | chr22:50943316 | p.S426C | G>C | NM_001363816 | TNBC | UPID08 |
| TYMP | Missense | chr22:50966034 | p.S210N | C>T | NM_001113756 | TNBC | UPID08 |
| SHANK3 | Missense | chr22:51160303 | p.A1334S | G>T | NM_033517 | TNBC | UPID08 |
| EXOSC7 | Missense | chr3:45048985 | p.V230E | T>A | NM_015004 | TNBC | UPID08 |
| BRPF1 | Missense | chr3:9783731 | p.M626T | T>C | NM_001003694 | TNBC | UPID08 |
| ADH1B | Missense | chr4:100239236 | p.S76C | T>A | NM_000668 | TNBC | UPID08 |
| NEUROG2 | Missense | chr4:113436450 | p.Q61L | T>A | NM_024019 | TNBC | UPID08 |
| BOD1L1 | Missense | chr4:13603146 | p.S1793T | C>G | NM_148894 | TNBC | UPID08 |
| RBM46 | Missense | chr4:155718998 | p.V63I | G>A | NM_001277171 | TNBC | UPID08 |
| NWD2 | Missense | chr4:37448369 | p.G1587R | G>A | NM_001144990 | TNBC | UPID08 |
| CRACD | Missense | chr4:57182654 | p.P996S | C>T | NM_020722 | TNBC | UPID08 |
| C4orf50 | Missense | chr4:5966792 | p.P1233A | G>C | NM_001364690 | TNBC | UPID08 |
| STPG2 | Missense | chr4:98761962 | p.A389E | G>T | NM_174952 | TNBC | UPID08 |
| ACSL6 | Missense | chr5:131329800 | p.L65H | A>T | NM_001009185 | TNBC | UPID08 |
| CYFIP2 | Missense | chr5:156819947 | p.T1208I | C>T | NM_001291721 | TNBC | UPID08 |
| SPDL1 | Missense | chr5:169028566 | p.I536T | T>C | NM_001329639 | TNBC | UPID08 |
| HK3 | Missense | chr5:176309005 | p.M726T | A>G | NM_002115 | TNBC | UPID08 |
| ZFP62 | Missense | chr5:180278280 | p.Q72R | A>C | NM_001172638 | TNBC | UPID08 |
| IL31RA | Missense | chr5:55168264 | p.R128G | A>G | NM_001242636 | TNBC | UPID08 |
| LAMA2 | Missense | chr6:129837420 | p.K3095N | G>C | NM_001079823 | TNBC | UPID08 |
| VNN3 | Missense | chr6:133045982 | p.H30Q | A>C | NM_001368156 | TNBC | UPID08 |
| ZKSCAN8 | Missense | chr6:28119650 | p.R9P | G>C | NM_001278122 | TNBC | UPID08 |
| RHAG | Missense | chr6:49578831 | p.H325Y | G>A | NM_000324 | TNBC | UPID08 |
| PTP4A1 | Missense | chr6:64288912 | p.H103R | A>G | NM_003463 | TNBC | UPID08 |
| FBXO24 | Frameshift | chr7:100192731 | p.G309Ifs*67 | delGGGGAGT | NM_001163499 | TNBC | UPID08 |
| ZAN | Missense | chr7:100383656 | p.K2290M | A>T | NM_173059 | TNBC | UPID08 |
| RNF148 | Missense | chr7:122342602 | p.L68P | A>G | NM_198085 | TNBC | UPID08 |
| FLNC | Missense | chr7:128489481 | p.S1683F | C>T | NM_001127487 | TNBC | UPID08 |
| HTR5A | Missense | chr7:154862982 | p.C125S | T>A | NM_024012 | TNBC | UPID08 |
| HDAC9 | Missense | chr7:18801837 | p.H657Y | C>T | NM_001321877 | TNBC | UPID08 |
| STK31 | Missense | chr7:23776569 | p.L274M | C>A | NM_001260504 | TNBC | UPID08 |
| STK31 | Missense | chr7:23810715 | p.V579A | T>C | NM_001260504 | TNBC | UPID08 |
| ASL | Splice site | chr7:65557754 | c.1251-1G>C | G>C | NM_001024943 | TNBC | UPID08 |
| CSMD3 | Missense | chr8:113697823 | p.D635V | T>A | NM_001363185 | TNBC | UPID08 |
| PLEKHA2 | Missense | chr8:38827037 | p.L338F | G>T | NM_021623 | TNBC | UPID08 |
| CHD7 | Missense | chr8:61769115 | p.Q2426K | C>A | NM_017780 | TNBC | UPID08 |
| POP1 | Nonsense | chr8:99146812 | p.W312* | G>A | NM_001145860 | TNBC | UPID08 |
| FREM1 | Frameshift | chr9:14851554 | p.A297Ffs*19 | delTCTGATTCGGAATTCCAGC | NM_001370060 | TNBC | UPID08 |
| IFNB1 | Missense | chr9:21077642 | p.A76G | G>C | NM_002176 | TNBC | UPID08 |
| NFX1 | Missense | chr9:33351618 | p.T830A | A>G | NM_001318758 | TNBC | UPID08 |
| DNAI1 | Missense | chr9:34485184 | p.W42C | G>C | NM_001281428 | TNBC | UPID08 |
| SPATA31D1 | Missense | chr9:84608779 | p.S1132C | A>T | NM_001001670 | TNBC | UPID08 |
| NXNL2 | Missense | chr9:91150449 | p.A34P | G>C | NM_001161625 | TNBC | UPID08 |
| HTR2C | Missense | chrX:114141592 | p.N331D | A>G | NM_000868 | TNBC | UPID08 |
| MAP3K15 | Nonsense | chrX:19482462 | p.C196* | G>T | NM_001001671 | TNBC | UPID08 |
| GYG2 | Missense | chrX:2778080 | p.E116K | G>A | NM_001184704 | TNBC | UPID08 |
| ARSF | Missense | chrX:3019165 | p.R335S | G>T | NM_001201538 | TNBC | UPID08 |
| SLC38A5 | Missense | chrX:48320499 | p.A222G | G>C | NM_033518 | TNBC | UPID08 |
| PORCN | Missense | chrX:48370843 | p.G168A | G>C | NM_203474 | TNBC | UPID08 |
| ATF6 | Missense | chr1:161789447 | p.R312C | C>T | NM_007348 | TNBC | UPID09 |
| LAMC1 | Missense | chr1:183106823 | p.A1445V | C>T | NM_002293 | TNBC | UPID09 |
| ZC3H11B | Missense | chr1:219783076 | p.L777I | G>T | NM_001355457 | TNBC | UPID09 |
| C1orf94 | Missense | chr1:34663352 | p.P283S | C>T | NM_001134734 | TNBC | UPID09 |
| DNMBP | Missense | chr10:101648587 | p.N726D | T>C | NM_001318326 | TNBC | UPID09 |
| JAKMIP3 | Missense | chr10:133946880 | p.A233V | C>T | NM_001105521 | TNBC | UPID09 |
| STK32C | Missense | chr10:134059405 | p.K119R | T>C | NM_001318878 | TNBC | UPID09 |
| INS-IGF2 | Missense | chr11:2169036 | p.G137S | C>T | NM_001042376 | TNBC | UPID09 |
| LDLRAD3 | Missense | chr11:36103276 | p.F40L | C>A | NM_001304263 | TNBC | UPID09 |
| TRIM6 | Missense | chr11:5626690 | p.I40V | A>G | NM_001198645 | TNBC | UPID09 |
| MYRF | Missense | chr11:61541452 | p.Y377N | T>A | NM_001127392 | TNBC | UPID09 |
| HEPHL1 | Missense | chr11:93845035 | p.C1152S | G>C | NM_001098672 | TNBC | UPID09 |
| POLE | Missense | chr12:133226271 | p.T1263A | T>C | NM_006231 | TNBC | UPID09 |
| RESF1 | Missense | chr12:32137887 | p.P1333Q | C>A | NM_018169 | TNBC | UPID09 |
| C12orf56 | Missense | chr12:64669128 | p.T327S | T>A | NM_001099676 | TNBC | UPID09 |
| IPO5 | Missense | chr13:98634782 | p.Q39R | A>G | NM_002271 | TNBC | UPID09 |
| GNB5 | Nonsense | chr15:52418190 | p.E280* | C>A | NM_006578 | TNBC | UPID09 |
| UBAP1L | Missense | chr15:65391964 | p.D263V | T>A | NM_001163692 | TNBC | UPID09 |
| NOX5 | Missense | chr15:69328251 | p.C360Y | G>A | NM_001184779 | TNBC | UPID09 |
| CHD2 | Missense | chr15:93558078 | p.Q1615H | G>C | NM_001271 | TNBC | UPID09 |
| COQ9 | Missense | chr16:57486804 | p.P112S | C>T | NM_020312 | TNBC | UPID09 |
| FBXO31 | Missense | chr16:87367768 | p.R374H | C>T | NM_024735 | TNBC | UPID09 |
| RILP | Missense | chr17:1550221 | p.P336L | G>A | NM_031430 | TNBC | UPID09 |
| NFE2L1 | Missense | chr17:46128562 | p.V28M | G>A | NM_001330261 | TNBC | UPID09 |
| CEP76 | Missense | chr18:12680714 | p.M337I | C>A | NM_001271989 | TNBC | UPID09 |
| ARHGAP28 | Missense | chr18:6837352 | p.R2K | G>A | NM_001010000 | TNBC | UPID09 |
| EEF2 | Splice site | chr19:3978172 | c.1714-2insGGGCGCCGGCGAGCTGCACCTGGAGATCTGCCTGAAGGACCTGGAGGAGGACCACGCCTGCATCCCCATCA | insTGATGGGGATGCAGGCGTGGTCCTCCTCCAGGTCCTTCAGGCAGATCTCCAGGTGCAGCTCGCCGGCGCCC | NM_001961 | TNBC | UPID09 |
| ZNF404 | Missense | chr19:44378204 | p.N51K | G>T | NM_001033719 | TNBC | UPID09 |
| EPN1 | Missense | chr19:56200253 | p.G166S | G>A | NM_001130072 | TNBC | UPID09 |
| NT5DC4 | Missense | chr2:113480114 | p.Q113H | G>T | NM_001350494 | TNBC | UPID09 |
| GTDC1 | Missense | chr2:144899611 | p.D120V | T>A | NM_001006636 | TNBC | UPID09 |
| EPC2 | Missense | chr2:149541197 | p.T630I | C>T | NM_015630 | TNBC | UPID09 |
| STRADB | Missense | chr2:202339443 | p.S130N | G>A | NM_001206864 | TNBC | UPID09 |
| FN1 | Frameshift | chr2:216293061 | p.N229Sfs*117 | insTTCTAGAAGTGCAAGTGATGCGTCCGCTGCCTTCTCCCAGGCAAGTACAATCTACCATCATCCAGC | NM_001306129 | TNBC | UPID09 |
| PANK2 | Frameshift | chr20:3897653 | p.N63Lfs*4 | delACCAACA | NM_001324193 | TNBC | UPID09 |
| CHD6 | Missense | chr20:40161933 | p.Q104E | G>C | NM_032221 | TNBC | UPID09 |
| SRMS | Nonsense | chr20:62178816 | p.M1? | T>C | NM_080823 | TNBC | UPID09 |
| BRWD1 | Missense | chr21:40571181 | p.E1721K | C>T | NM_018963 | TNBC | UPID09 |
| MIOX | Missense | chr22:50927559 | p.L167I | C>A | NM_017584 | TNBC | UPID09 |
| BOC | Missense | chr3:112992038 | p.P362S | C>T | NM_001301861 | TNBC | UPID09 |
| CFAP91 | Nonsense | chr3:119456243 | p.E333* | G>T | NM_001320318 | TNBC | UPID09 |
| LEKR1 | Nonsense | chr3:156645332 | p.W166* | G>A | NM_001004316 | TNBC | UPID09 |
| PIK3CA | Missense | chr3:178936091 | p.E545K | G>A | NM_006218 | TNBC | UPID09 |
| TNK2 | Missense | chr3:195594692 | p.P843L | G>A | NM_001308046 | TNBC | UPID09 |
| GOLGA4 | Missense | chr3:37357025 | p.E450G | A>G | NM_002078 | TNBC | UPID09 |
| CTNNB1 | Missense | chr3:41266935 | p.M202I | G>A | NM_001098209 | TNBC | UPID09 |
| CTNNB1 | Frameshift | chr3:41274934 | p.Q395Rfs*18 | delAGGTAAATTCTGAGTAAACTGGTGCCATGGGAATAGAGTCAAGATGAGTATGTGCTTGTACTGACCATCTGTTTTTATCTCCAT | NM_001098209 | TNBC | UPID09 |
| APPL1 | Missense | chr3:57282313 | p.P266Q | C>A | NM_012096 | TNBC | UPID09 |
| ZFYVE28 | Missense | chr4:2321898 | p.R238W | T>A | NM_001172656 | TNBC | UPID09 |
| RFC1 | Missense | chr4:39304481 | p.L713P | A>G | NM_001363495 | TNBC | UPID09 |
| DAB2 | Missense | chr5:39382998 | p.G334C | C>A | NM_001244871 | TNBC | UPID09 |
| TAF9 | Missense | chr5:68661362 | p.A68V | G>A | NM_001015892 | TNBC | UPID09 |
| RASA1 | Missense | chr5:86681121 | p.S921C | C>G | NM_002890 | TNBC | UPID09 |
| RSPO3 | Missense | chr6:127517130 | p.V266A | T>C | NM_032784 | TNBC | UPID09 |
| ARID1B | Splice site | chr6:157511345 | c.4111+1G>C | G>C | NM_001371656 | TNBC | UPID09 |
| DUSP22 | Missense | chr6:350855 | p.L181R | T>G | NM_020185 | TNBC | UPID09 |
| TSC22D4 | Missense | chr7:100075304 | p.G120R | C>T | NM_001303043 | TNBC | UPID09 |
| COL22A1 | Splice site | chr8:139661907 | c.3447+1G>A | C>T | NM_152888 | TNBC | UPID09 |
| ADRB3 | Nonsense | chr8:37823987 | p.M1? | T>C | NM_000025 | TNBC | UPID09 |
| CNTRL | Missense | chr9:123933743 | p.A1560T | G>A | NM_001330762 | TNBC | UPID09 |
| CNTFR | Missense | chr9:34552744 | p.W293R | A>T | NM_001842 | TNBC | UPID09 |
| TRMT2B | Missense | chrX:100276170 | p.A329V | G>A | NM_001167972 | TNBC | UPID09 |
| FLNA | Missense | chrX:153580023 | p.P2309T | G>T | NM_001456 | TNBC | UPID09 |
| RAI2 | Missense | chrX:17819838 | p.G98E | C>T | NM_021785 | TNBC | UPID09 |
| PPP4R3C | Missense | chrX:27479072 | p.C781F | C>A | NM_207319 | TNBC | UPID09 |
| HDAC6 | Missense | chrX:48675815 | p.S625C | C>G | NM_001321226 | TNBC | UPID09 |
| USP27X | Missense | chrX:49645943 | p.S345C | A>T | NM_001145073 | TNBC | UPID09 |
| WNK3 | Missense | chrX:54275498 | p.S1095P | A>G | NM_001002838 | TNBC | UPID09 |
| CLCN6 | Missense | chr1:11883797 | p.K163E | A>G | NM_001286 | TNBC | UPID10 |
| TDRKH | Missense | chr1:151751647 | p.E165K | C>T | NM_001083963 | TNBC | UPID10 |
| CREB3L4 | Frameshift | chr1:153946100 | p.L302Ffs*30 | delTTCT | NM_001255978 | TNBC | UPID10 |
| SLC9C2 | Missense | chr1:173493186 | p.I854M | G>C | NM_178527 | TNBC | UPID10 |
| SOX13 | Splice site | chr1:204083734 | c.418+1G>C | G>C | NM_005686 | TNBC | UPID10 |
| YOD1 | Nonsense | chr1:207222713 | p.*233W | T>C | NM_018566 | TNBC | UPID10 |
| PYCR2 | Missense | chr1:226109049 | p.D145G | T>C | NM_001271681 | TNBC | UPID10 |
| RYR2 | Missense | chr1:237664157 | p.I784L | A>C | NM_001035 | TNBC | UPID10 |
| OR2G2 | Missense | chr1:247751911 | p.L84I | C>A | NM_001001915 | TNBC | UPID10 |
| PUM1 | Missense | chr1:31406160 | p.K1155N | C>A | NM_001020658 | TNBC | UPID10 |
| PTPRF | Missense | chr1:44083421 | p.D1100N | G>A | NM_001329140 | TNBC | UPID10 |
| DAB1 | Missense | chr1:57491662 | p.R260G | A>C | NM_001353983 | TNBC | UPID10 |
| PROSER2 | Missense | chr10:11908620 | p.E77Q | G>C | NM_153256 | TNBC | UPID10 |
| TACC2 | Missense | chr10:123845007 | p.A998P | G>C | NM_001291876 | TNBC | UPID10 |
| PTPRE | Missense | chr10:129839144 | p.T20I | C>T | NM_001323355 | TNBC | UPID10 |
| CUL2 | Missense | chr10:35321385 | p.S320C | G>C | NM_001324375 | TNBC | UPID10 |
| USP54 | Missense | chr10:75276592 | p.S1141P | A>G | NM_001320437 | TNBC | UPID10 |
| DLG5 | Missense | chr10:79552277 | p.S1894L | G>A | NM_004747 | TNBC | UPID10 |
| EIF5AL1 | Missense | chr10:81272525 | p.I40M | C>G | NM_001099692 | TNBC | UPID10 |
| CCDC15 | Missense | chr11:124910575 | p.S942T | T>A | NM_025004 | TNBC | UPID10 |
| FNBP4 | Missense | chr11:47774569 | p.K181R | T>C | NM_001318339 | TNBC | UPID10 |
| OR5M9 | Missense | chr11:56230564 | p.V105D | A>T | NM_001004743 | TNBC | UPID10 |
| MS4A18 | Missense | chr11:60496896 | p.Q36H | G>T | NM_001354471 | TNBC | UPID10 |
| RIN1 | Missense | chr11:66102272 | p.S305N | C>T | NM_001363559 | TNBC | UPID10 |
| SVOP | Missense | chr12:109332667 | p.L225S | A>G | NM_018711 | TNBC | UPID10 |
| MSI1 | Missense | chr12:120796832 | p.D143H | C>G | NM_002442 | TNBC | UPID10 |
| MLXIP | Missense | chr12:122517063 | p.V102I | G>A | NM_014938 | TNBC | UPID10 |
| ANKLE2 | Missense | chr12:133306470 | p.D760N | C>T | NM_015114 | TNBC | UPID10 |
| GOLGA3 | Missense | chr12:133353271 | p.L1309F | C>G | NM_005895 | TNBC | UPID10 |
| WIF1 | Missense | chr12:65460456 | p.C232F | C>A | NM_007191 | TNBC | UPID10 |
| E2F7 | Missense | chr12:77419369 | p.G845V | C>A | NM_203394 | TNBC | UPID10 |
| OTOGL | Nonsense | chr12:80665451 | p.E839* | G>T | NM_001368062 | TNBC | UPID10 |
| TRPC4 | Missense | chr13:38211543 | p.A638T | C>T | NM_001135958 | TNBC | UPID10 |
| SLITRK6 | Missense | chr13:86368218 | p.R809T | C>G | NM_032229 | TNBC | UPID10 |
| ADCY4 | Missense | chr14:24801867 | p.I127T | A>G | NM_001198568 | TNBC | UPID10 |
| KHNYN | Missense | chr14:24901651 | p.G436V | G>T | NM_001290256 | TNBC | UPID10 |
| LRRC74A | Frameshift | chr14:77310802 | p.Q212Pfs*8 | delGCCAA | NM_194287 | TNBC | UPID10 |
| CDIN1 | Missense | chr15:37002125 | p.A190T | G>A | NM_001321758 | TNBC | UPID10 |
| DMXL2 | Missense | chr15:51829050 | p.S543T | A>T | NM_001174116 | TNBC | UPID10 |
| BAIAP3 | Missense | chr16:1398126 | p.R1024H | G>A | NM_001199096 | TNBC | UPID10 |
| PDILT | Missense | chr16:20396058 | p.E106D | C>G | NM_174924 | TNBC | UPID10 |
| RGS11 | Missense | chr16:319522 | p.I239M | G>C | NM_001286486 | TNBC | UPID10 |
| C17orf75 | Missense | chr17:30666940 | p.T80N | G>T | NM_022344 | TNBC | UPID10 |
| TMEM132E | Missense | chr17:32964440 | p.T805N | C>A | NM_001304438 | TNBC | UPID10 |
| SLFN5 | Missense | chr17:33586622 | p.V305L | G>T | NM_001330183 | TNBC | UPID10 |
| NCBP3 | Missense | chr17:3717712 | p.V511I | C>T | NM_001114118 | TNBC | UPID10 |
| KRT9 | Missense | chr17:39724443 | p.H455Q | G>T | NM_000226 | TNBC | UPID10 |
| CA10 | Missense | chr17:49710851 | p.K317M | T>A | NM_020178 | TNBC | UPID10 |
| BRIP1 | Frameshift | chr17:59760702 | p.E1222Dfs*19 | delTTTAAAGTTCTTTATTTCTATTTCATGAGTTTTTCCCAGT | NM_032043 | TNBC | UPID10 |
| LLGL2 | Missense | chr17:73569585 | p.E917Q | G>C | NM_001031803 | TNBC | UPID10 |
| MFSD11 | Missense | chr17:74737076 | p.L64M | T>A | NM_001242532 | TNBC | UPID10 |
| TP53 | Missense | chr17:7579349 | p.F74C | A>C | NM_001276760 | TNBC | UPID10 |
| ENDOV | Splice site | chr17:78398831 | c.382-1G>C | G>C | NM_001164638 | TNBC | UPID10 |
| ZNF24 | Missense | chr18:32919849 | p.A171V | G>A | NM_001308123 | TNBC | UPID10 |
| KIR2DS1 | Missense | chr19:118795 | p.K91T | A>C | NM_014512 | TNBC | UPID10 |
| KIR2DS1 | Missense | chr19:118854 | p.L111V | T>G | NM_014512 | TNBC | UPID10 |
| ZNF536 | Missense | chr19:31039215 | p.F897I | T>A | NM_001352260 | TNBC | UPID10 |
| ACTN4 | Missense | chr19:39217672 | p.T756A | A>G | NM_001322033 | TNBC | UPID10 |
| CYP2A13 | Missense | chr19:41601725 | p.T455N | C>A | NM_000766 | TNBC | UPID10 |
| STRN4 | Frameshift | chr19:47228072 | p.D536Gfs*37 | insC | NM_001039877 | TNBC | UPID10 |
| MUC16 | Missense | chr19:9057863 | p.F9861L | G>T | NM_024690 | TNBC | UPID10 |
| MUC16 | Missense | chr19:9088037 | p.E1260Q | C>G | NM_024690 | TNBC | UPID10 |
| MAP3K19 | Nonsense | chr2:135744671 | p.Q478* | G>A | NM_001018044 | TNBC | UPID10 |
| NEB | Missense | chr2:152507284 | p.R2344T | C>G | NM_001164507 | TNBC | UPID10 |
| NBAS | Missense | chr2:15542357 | p.C1002W | A>C | NM_015909 | TNBC | UPID10 |
| SCN1A | Missense | chr2:166847797 | p.K1996N | T>A | NM_001353948 | TNBC | UPID10 |
| NT5C1B | Missense | chr2:18757576 | p.Q401H | C>G | NM_033253 | TNBC | UPID10 |
| MATN3 | Missense | chr2:20205525 | p.R257K | C>T | NM_002381 | TNBC | UPID10 |
| SP110 | Missense | chr2:231065669 | p.G354V | C>A | NM_004510 | TNBC | UPID10 |
| MAB21L4 | Missense | chr2:241829456 | p.G287D | C>T | NM_001085437 | TNBC | UPID10 |
| BIRC6 | Missense | chr2:32626571 | p.I433N | T>A | NM_016252 | TNBC | UPID10 |
| SLC8A1 | Missense | chr2:40657217 | p.D68E | G>T | NM_001112800 | TNBC | UPID10 |
| DYSF | Nonsense | chr2:71883418 | p.K1532* | A>T | NM_001130976 | TNBC | UPID10 |
| DEFB115 | Missense | chr20:29845507 | p.K14R | A>G | NM_001037730 | TNBC | UPID10 |
| CEP250 | Missense | chr20:34091338 | p.K1082T | A>C | NM_001318219 | TNBC | UPID10 |
| TRIB3 | Missense | chr20:368774 | p.Q40H | G>T | NM_001301188 | TNBC | UPID10 |
| KCNG1 | Missense | chr20:49620589 | p.R510T | C>G | NM_002237 | TNBC | UPID10 |
| NKAIN4 | Missense | chr20:61881414 | p.L22P | A>G | NM_152864 | TNBC | UPID10 |
| TMPRSS15 | Missense | chr21:19775890 | p.Y17F | T>A | NM_002772 | TNBC | UPID10 |
| UMODL1 | Missense | chr21:43505462 | p.F181L | C>G | NM_001004416 | TNBC | UPID10 |
| CABIN1 | Missense | chr22:24560414 | p.F1548S | T>C | NM_001201429 | TNBC | UPID10 |
| KREMEN1 | Missense | chr22:29533487 | p.I263M | C>G | NM_001039570 | TNBC | UPID10 |
| CARD10 | Missense | chr22:37891851 | p.K740R | T>C | NM_014550 | TNBC | UPID10 |
| POLR2F | Missense | chr22:38352799 | p.D14H | G>C | NM_001301130 | TNBC | UPID10 |
| CACNA1I | Missense | chr22:40060786 | p.R1202G | C>G | NM_001003406 | TNBC | UPID10 |
| CYB5R3 | Missense | chr22:43023369 | p.R192C | G>A | NM_000398 | TNBC | UPID10 |
| NUP50 | Missense | chr22:45571833 | p.G71V | G>T | NM_007172 | TNBC | UPID10 |
| MOV10L1 | Missense | chr22:50599802 | p.G314A | G>C | NM_001164106 | TNBC | UPID10 |
| ADGRG7 | Splice site | chr3:100362109 | c.699-1G>A | G>A | NM_032787 | TNBC | UPID10 |
| DZIP3 | Missense | chr3:108351861 | p.S253N | G>A | NM_014648 | TNBC | UPID10 |
| DZIP3 | Missense | chr3:108392943 | p.R870G | C>G | NM_014648 | TNBC | UPID10 |
| BOC | Frameshift | chr3:113005622 | p.Y1089Cfs*22 | insGCCT | NM_001301861 | TNBC | UPID10 |
| B4GALT4 | Missense | chr3:118948741 | p.T69R | G>C | NM_003778 | TNBC | UPID10 |
| KPNA1 | Missense | chr3:122170910 | p.A189E | G>T | NM_002264 | TNBC | UPID10 |
| ANKUB1 | Missense | chr3:149508684 | p.D40N | C>T | NM_001144960 | TNBC | UPID10 |
| ZBBX | Missense | chr3:167033608 | p.E373K | C>T | NM_001199202 | TNBC | UPID10 |
| KLHL24 | Missense | chr3:183382730 | p.D376V | A>T | NM_001349415 | TNBC | UPID10 |
| CCDC13 | Missense | chr3:42788811 | p.K220E | T>C | NM_144719 | TNBC | UPID10 |
| COL7A1 | Missense | chr3:48607033 | p.W2536R | C>G | NM_000094 | TNBC | UPID10 |
| BSN | Nonsense | chr3:49700935 | p.Q3782* | C>T | NM_003458 | TNBC | UPID10 |
| SEMA3B | Missense | chr3:50313824 | p.A303D | C>A | NM_001290062 | TNBC | UPID10 |
| CACNA2D2 | Missense | chr3:50413093 | p.I630K | A>T | NM_001005505 | TNBC | UPID10 |
| DUSP7 | Nonsense | chr3:52085068 | p.C331* | delGACCGTCACTGAGCGGCTGATGCCTGCCAGG | NM_001947 | TNBC | UPID10 |
| RFT1 | Missense | chr3:53164382 | p.R12Q | C>T | NM_052859 | TNBC | UPID10 |
| PTPRG | Missense | chr3:62118276 | p.V206F | G>T | NM_002841 | TNBC | UPID10 |
| SRGAP3 | Missense | chr3:9089077 | p.E469V | T>A | NM_001033117 | TNBC | UPID10 |
| MTTP | Missense | chr4:100515921 | p.G291R | G>C | NM_001300785 | TNBC | UPID10 |
| OSTC | Missense | chr4:109571815 | p.E2Q | G>C | NM_001267817 | TNBC | UPID10 |
| AP1AR | Missense | chr4:113187770 | p.T148A | A>G | NM_001128426 | TNBC | UPID10 |
| TLR2 | Missense | chr4:154626031 | p.L658V | C>G | NM_001318789 | TNBC | UPID10 |
| CLCN3 | Missense | chr4:170618560 | p.A386G | C>G | NM_001243372 | TNBC | UPID10 |
| JAKMIP1 | Missense | chr4:6058459 | p.L393M | G>T | NM_001306134 | TNBC | UPID10 |
| CDKL2 | Missense | chr4:76522335 | p.G369V | C>A | NM_001330724 | TNBC | UPID10 |
| LVRN | Missense | chr5:115329523 | p.I449S | T>G | NM_173800 | TNBC | UPID10 |
| HARS1 | Missense | chr5:140053895 | p.D379H | C>G | NM_001289093 | TNBC | UPID10 |
| PCDHB11 | Missense | chr5:140580836 | p.H497Y | C>T | NM_018931 | TNBC | UPID10 |
| ZNF300 | Missense | chr5:150278089 | p.V15M | C>T | NM_052860 | TNBC | UPID10 |
| ITGA1 | Missense | chr5:52235424 | p.A1028V | C>T | NM_181501 | TNBC | UPID10 |
| MSH3 | Splice site | chr5:80088551 | c.2544-1G>C | G>C | NM_002439 | TNBC | UPID10 |
| SLC22A16 | Missense | chr6:110760000 | p.V412F | C>A | NM_033125 | TNBC | UPID10 |
| ROS1 | Splice site | chr6:117641194 | c.5760-1G>A | C>T | NM_001378902 | TNBC | UPID10 |
| ECHDC1 | Missense | chr6:127611188 | p.K169N | C>G | NM_001105544 | TNBC | UPID10 |
| THEMIS | Missense | chr6:128134987 | p.L267V | G>C | NM_001010923 | TNBC | UPID10 |
| LAMA2 | Missense | chr6:129670471 | p.L1489I | C>A | NM_001079823 | TNBC | UPID10 |
| LAMA2 | Missense | chr6:129833559 | p.T2966K | C>A | NM_001079823 | TNBC | UPID10 |
| HBS1L | Nonsense | chr6:135358698 | p.Y299* | A>C | NM_001145207 | TNBC | UPID10 |
| MAP3K5 | Missense | chr6:136879974 | p.Y1343C | T>C | NM_005923 | TNBC | UPID10 |
| MAP3K5 | Missense | chr6:137018443 | p.A297T | C>T | NM_005923 | TNBC | UPID10 |
| SCAF8 | Missense | chr6:155126554 | p.E383D | A>C | NM_001286188 | TNBC | UPID10 |
| TIAM2 | Missense | chr6:155578129 | p.D585E | C>A | NM_001010927 | TNBC | UPID10 |
| H4C2 | Missense | chr6:26027198 | p.L95I | C>T | NM_003544 | TNBC | UPID10 |
| H2BC17 | Missense | chr6:27861422 | p.G61A | G>C | NM_003527 | TNBC | UPID10 |
| SERPINB9 | Missense | chr6:2895723 | p.L109R | A>C | NM_004155 | TNBC | UPID10 |
| TRERF1 | Missense | chr6:42196389 | p.K1119N | T>A | NM_001297573 | TNBC | UPID10 |
| UBR2 | Splice site | chr6:42603155 | c.1546-1G>C | G>C | NM_015255 | TNBC | UPID10 |
| CUL7 | Missense | chr6:43020480 | p.P16H | G>T | NM_001168370 | TNBC | UPID10 |
| MLIP | Missense | chr6:53989329 | p.A93G | C>G | NM_001281746 | TNBC | UPID10 |
| BAG2 | Missense | chr6:57048881 | p.L177M | C>A | NM_004282 | TNBC | UPID10 |
| CD109 | Missense | chr6:74516767 | p.T977I | C>T | NM_001159588 | TNBC | UPID10 |
| DSP | Missense | chr6:7584974 | p.F2493L | C>G | NM_001008844 | TNBC | UPID10 |
| SENP6 | Missense | chr6:76331298 | p.S35C | A>T | NM_001100409 | TNBC | UPID10 |
| SNAP91 | Missense | chr6:84292037 | p.V378L | C>G | NM_001242794 | TNBC | UPID10 |
| MDN1 | Missense | chr6:90382326 | p.E4524Q | C>G | NM_014611 | TNBC | UPID10 |
| GNB2 | Missense | chr7:100276341 | p.R314C | C>T | NM_005273 | TNBC | UPID10 |
| MUC17 | Missense | chr7:100674963 | p.P89L | C>T | NM_001040105 | TNBC | UPID10 |
| PSMC2 | Missense | chr7:103008244 | p.P378S | C>T | NM_002803 | TNBC | UPID10 |
| SLC26A3 | Missense | chr7:107431566 | p.S166C | G>C | NM_000111 | TNBC | UPID10 |
| ZC3HC1 | Nonsense | chr7:129663437 | p.G340* | C>A | NM_001363701 | TNBC | UPID10 |
| BZW2 | Missense | chr7:16734513 | p.D42N | G>A | NM_001362718 | TNBC | UPID10 |
| DNAH11 | Missense | chr7:21789302 | p.L2894I | C>A | NM_001277115 | TNBC | UPID10 |
| BRAT1 | Missense | chr7:2583276 | p.D76N | C>T | NM_001350627 | TNBC | UPID10 |
| URGCP | Missense | chr7:43917897 | p.P380S | G>A | NM_017920 | TNBC | UPID10 |
| EGFR | Missense | chr7:55233081 | p.A344S | G>T | NM_001346941 | TNBC | UPID10 |
| CRCP | Splice site | chr7:65595830 | c.144+1G>T | G>T | NM_014478 | TNBC | UPID10 |
| OR2AE1 | Missense | chr7:99474127 | p.F177C | A>C | NM_001005276 | TNBC | UPID10 |
| MCM7 | Missense | chr7:99690995 | p.E450D | C>G | NM_001278595 | TNBC | UPID10 |
| PHF20L1 | Splice site | chr8:133790158 | c.83+1G>A | G>A | NM_001362971 | TNBC | UPID10 |
| FAM83H | Missense | chr8:144812324 | p.M143I | C>A | NM_198488 | TNBC | UPID10 |
| UBXN8 | Missense | chr8:30623824 | p.A242Thr | G>A | NM_005671 | TNBC | UPID10 |
| CHRNA6 | Missense | chr8:42611214 | p.R361S | C>G | NM_001199279 | TNBC | UPID10 |
| CHD7 | Splice site | chr8:61764577 | c.5666-1G>T | G>T | NM_017780 | TNBC | UPID10 |
| PKN3 | Missense | chr9:131468076 | p.L110P | T>C | NM_001317926 | TNBC | UPID10 |
| WDR5 | Missense | chr9:137019632 | p.G226S | G>A | NM_017588 | TNBC | UPID10 |
| NFIB | Missense | chr9:14307202 | p.R116S | C>G | NM_001190737 | TNBC | UPID10 |
| NOL6 | Missense | chr9:33462698 | p.Q688H | C>G | NM_139235 | TNBC | UPID10 |
| CD72 | Missense | chr9:35616101 | p.R176K | C>T | NM_001782 | TNBC | UPID10 |
| TPM2 | Missense | chr9:35684243 | p.E258K | C>T | NM_001301226 | TNBC | UPID10 |
| KIAA2026 | Missense | chr9:5920286 | p.L1904I | G>T | NM_001017969 | TNBC | UPID10 |
| TCEAL3 | Missense | chrX:102864192 | p.E67G | A>G | NM_001006933 | TNBC | UPID10 |
| TSC22D3 | Nonsense | chrX:107018647 | p.M1? | C>A | NM_198057 | TNBC | UPID10 |
| COL4A6 | Missense | chrX:107423810 | p.P689H | G>T | NM_001287759 | TNBC | UPID10 |
| AMOT | Splice site | chrX:112033819 | c.2117+1G>T | C>A | NM_133265 | TNBC | UPID10 |
| IGSF1 | Missense | chrX:130412527 | p.L641Q | A>T | NM_001170962 | TNBC | UPID10 |
| ADGRG4 | Missense | chrX:135405149 | p.D95Y | G>T | NM_153834 | TNBC | UPID10 |
| SLC10A3 | Missense | chrX:153716166 | p.R372C | G>A | NM_019848 | TNBC | UPID10 |
| GRPR | Missense | chrX:16170659 | p.H349P | A>C | NM_005314 | TNBC | UPID10 |
| GPKOW | Missense | chrX:48974010 | p.L241V | G>C | NM_015698 | TNBC | UPID10 |
| BMP15 | Missense | chrX:50659212 | p.L262I | C>A | NM_005448 | TNBC | UPID10 |
| ARR3 | Missense | chrX:69500092 | p.Y318C | A>G | NM_004312 | TNBC | UPID10 |
| TENT5D | Nonsense | chrX:79698071 | p.W11* | G>A | NM_152630 | TNBC | UPID10 |
| BRWD3 | Missense | chrX:80047421 | p.A121G | G>C | NM_153252 | TNBC | UPID10 |
| VPS13D | Missense | chr1:12348325 | p.A1894T | G>A | NM_015378 | TNBC | UPID11 |
| VPS13D | Missense | chr1:12371654 | p.P2265R | C>G | NM_015378 | TNBC | UPID11 |
| FCRL3 | Frameshift | chr1:157668211 | p.R85Lfs*4 | delGGATCCTC | NM_001320333 | TNBC | UPID11 |
| HMCN1 | Missense | chr1:185815190 | p.K101Q | A>C | NM_031935 | TNBC | UPID11 |
| ZNF518A | Missense | chr10:97917685 | p.Q536E | C>G | NM_014803 | TNBC | UPID11 |
| QSER1 | Frameshift | chr11:32954513 | p.Q570Pfs*9 | delAGGTTAGCTATTCATCT | NM_001076786 | TNBC | UPID11 |
| RAPSN | Missense | chr11:47460284 | p.R330W | T>A | NM_032645 | TNBC | UPID11 |
| TRIM5 | Missense | chr11:5686316 | p.I402T | A>G | NM_033034 | TNBC | UPID11 |
| C11orf98 | Frameshift | chr11:62432590 | p.P13Efs*4 | delCCCACACAGTCACCGTT | NM_001286086 | TNBC | UPID11 |
| CDHR5 | Missense | chr11:624825 | p.Q26H | C>G | NM_001171968 | TNBC | UPID11 |
| FAT3 | Missense | chr11:92616313 | p.P4231A | C>G | NM_001008781 | TNBC | UPID11 |
| PAH | Missense | chr12:103271326 | p.P119S | G>A | NM_000277 | TNBC | UPID11 |
| MLXIP | Missense | chr12:122622980 | p.A756T | G>A | NM_014938 | TNBC | UPID11 |
| SLCO1B7 | Missense | chr12:21196500 | p.K273N | A>C | NM_001009562 | TNBC | UPID11 |
| TMTC1 | Splice site | chr12:29920830 | c.156+1G>C | C>G | NM_175861 | TNBC | UPID11 |
| KCNH3 | Missense | chr12:49936531 | p.F103C | T>G | NM_001314030 | TNBC | UPID11 |
| CCDC168 | Missense | chr13:103396243 | p.F2268L | G>T | NM_001146197 | TNBC | UPID11 |
| MED4 | Missense | chr13:48654103 | p.R127W | G>A | NM_001270629 | TNBC | UPID11 |
| ATG14 | Missense | chr14:55878521 | p.K7R | T>C | NM_014924 | TNBC | UPID11 |
| DAPK2 | Missense | chr15:64275772 | p.V92I | C>T | NM_001363730 | TNBC | UPID11 |
| NTRK3 | Missense | chr15:88690608 | p.T141I | G>A | NM_001320134 | TNBC | UPID11 |
| SMG1 | Missense | chr16:18844433 | p.M2874R | A>C | NM_015092 | TNBC | UPID11 |
| C16orf96 | Missense | chr16:4625857 | p.E459G | A>G | NM_001145011 | TNBC | UPID11 |
| SEC14L5 | Missense | chr16:5041939 | p.R192H | G>A | NM_014692 | TNBC | UPID11 |
| TP53 | Nonsense | chr17:7578188 | p.E182* | C>A | NM_001276760 | TNBC | UPID11 |
| MRPL12 | Missense | chr17:79674193 | p.A174P | G>C | NM_002949 | TNBC | UPID11 |
| PHLPP1 | Missense | chr18:60383920 | p.S335C | C>G | NM_194449 | TNBC | UPID11 |
| MED26 | Missense | chr19:16687949 | p.S231N | C>T | NM_004831 | TNBC | UPID11 |
| WDR62 | Missense | chr19:36557218 | p.E150D | G>C | NM_001083961 | TNBC | UPID11 |
| HSPBP1 | Missense | chr19:55785805 | p.C247S | A>T | NM_001297600 | TNBC | UPID11 |
| NEB | Frameshift | chr2:152466360 | p.C3848Lfs*37 | delATGTCGTTTTGATCCGGCATGC | NM_004543 | TNBC | UPID11 |
| NT5C1B | Nonsense | chr2:18765881 | p.Q208* | G>A | NM_033253 | TNBC | UPID11 |
| GULP1 | Missense | chr2:189449032 | p.F217C | T>G | NM_016315 | TNBC | UPID11 |
| TTLL4 | Missense | chr2:219617885 | p.V1079I | G>A | NM_014640 | TNBC | UPID11 |
| SPEG | Missense | chr2:220309859 | p.R264I | G>T | NM_005876 | TNBC | UPID11 |
| ASIC4 | Missense | chr2:220379778 | p.G238V | G>T | NM_018674 | TNBC | UPID11 |
| ACSL3 | Missense | chr2:223791844 | p.C468G | T>G | NM_001354159 | TNBC | UPID11 |
| SFXN5 | Missense | chr2:73172163 | p.N200K | G>T | NM_001371743 | TNBC | UPID11 |
| NDRG3 | Missense | chr20:35350122 | p.D6G | T>C | NM_022477 | TNBC | UPID11 |
| TPTE | Nonsense | chr21:10906902 | c.1656_*3del | delTACT | NM_199261 | TNBC | UPID11 |
| CBS | Missense | chr21:44480640 | p.W352C | G>A | NM_000071 | TNBC | UPID11 |
| VPREB1 | Nonsense | chr22:22599215 | p.M1? | AT>GC | NM_001303509 | TNBC | UPID11 |
| TOM1 | Missense | chr22:35695948 | p.F9L | C>A | NM_001135730 | TNBC | UPID11 |
| PLXNB2 | Missense | chr22:50726381 | p.C489Y | C>T | NM_012401 | TNBC | UPID11 |
| KPNA4 | Missense | chr3:160239635 | p.M279V | T>C | NM_002268 | TNBC | UPID11 |
| NLGN1 | Missense | chr3:173525520 | p.G182S | G>A | NM_001365929 | TNBC | UPID11 |
| MAML3 | Missense | chr4:141074391 | p.I31V | T>C | NM_018717 | TNBC | UPID11 |
| WDR19 | Missense | chr4:39201145 | p.L152M | C>A | NM_025132 | TNBC | UPID11 |
| RFC1 | Missense | chr4:39308256 | p.P625T | G>T | NM_001363495 | TNBC | UPID11 |
| CAMK4 | Missense | chr5:110819990 | p.M219I | G>A | NM_001323376 | TNBC | UPID11 |
| C5orf24 | Missense | chr5:134191141 | p.K184R | A>G | NM_001135586 | TNBC | UPID11 |
| AHRR | Missense | chr5:424064 | p.C231Y | G>A | NM_001242412 | TNBC | UPID11 |
| ITGA1 | Missense | chr5:52201659 | p.Y459C | A>G | NM_181501 | TNBC | UPID11 |
| GZMK | Missense | chr5:54320488 | p.C22S | G>C | NM_002104 | TNBC | UPID11 |
| HEXB | Missense | chr5:74011451 | p.I340V | A>G | NM_000521 | TNBC | UPID11 |
| CAST | Nonsense | chr5:96063217 | p.K16* | A>T | NM_001042444 | TNBC | UPID11 |
| ZC2HC1B | Missense | chr6:144207260 | p.P61H | C>A | NM_001013623 | TNBC | UPID11 |
| IPCEF1 | Missense | chr6:154544335 | p.V97L | C>A | NM_001130700 | TNBC | UPID11 |
| PI16 | Splice site | chr6:36931390 | c.1270+2T>C | T>C | NM_001199159 | TNBC | UPID11 |
| KMT2E | Missense | chr7:104753061 | p.Q1620E | C>G | NM_018682 | TNBC | UPID11 |
| CBX3 | Missense | chr7:26245998 | p.G12E | G>A | NM_007276 | TNBC | UPID11 |
| CRHR2 | Missense | chr7:30721841 | p.A19V | G>A | NM_001202482 | TNBC | UPID11 |
| ASAP1 | Frameshift | chr8:131128977 | p.E671Kfs*4 | delC | NM_001362926 | TNBC | UPID11 |
| ZNF517 | Missense | chr8:146032905 | p.A195T | G>A | NM_001317936 | TNBC | UPID11 |
| MAPKAP1 | Missense | chr9:128305355 | p.G122A | C>G | NM_001006621 | TNBC | UPID11 |
| GARNL3 | Missense | chr9:130145749 | p.N732D | A>G | NM_032293 | TNBC | UPID11 |
| HMCN2 | Missense | chr9:133240213 | p.K1611N | G>C | NM_001291815 | TNBC | UPID11 |
| AK8 | Missense | chr9:135704046 | p.T112I | G>A | NM_001371772 | TNBC | UPID11 |
| ZNF169 | Missense | chr9:97062151 | p.S105L | C>T | NM_003448 | TNBC | UPID11 |
| AFF2 | Missense | chrX:147743690 | p.L144V | C>G | NM_001169122 | TNBC | UPID11 |
| HMGN5 | Nonsense | chrX:80370240 | p.K253* | T>A | NM_030763 | TNBC | UPID11 |
| POGZ | Missense | chr1:151400469 | p.T208I | G>A | NM_145796 | TNBC | UPID12 |
| GON4L | Missense | chr1:155823094 | p.P160S | G>A | NM_001282856 | TNBC | UPID12 |
| CFAP74 | Nonsense | chr1:1871035 | p.K959* | T>A | NM_001304360 | TNBC | UPID12 |
| ZNF695 | Missense | chr1:247109128 | p.V164F | C>A | NM_001204221 | TNBC | UPID12 |
| OR2G2 | Missense | chr1:247752089 | p.L143H | T>A | NM_001001915 | TNBC | UPID12 |
| MAN1C1 | Missense | chr1:25944734 | p.R149L | G>T | NM_001289010 | TNBC | UPID12 |
| PTPRU | Missense | chr1:29609429 | p.I704L | A>C | NM_001195001 | TNBC | UPID12 |
| PFKP | Nonsense | chr10:3124582 | p.M12V | A>G | NM_001323067 | TNBC | UPID12 |
| MUC6 | Frameshift | chr11:1027942 | p.A612Efs*51 | delCCAAGACGCCCTCGGGCCCTCACCTTGTAGAAGGGTG | NM_005961 | TNBC | UPID12 |
| TH | Missense | chr11:2185545 | p.S471N | C>T | NM_000360 | TNBC | UPID12 |
| XRRA1 | Missense | chr11:74559344 | p.T420I | G>A | NM_001270380 | TNBC | UPID12 |
| CREBZF | Missense | chr11:85375622 | p.D100Y | C>A | NM_001039618 | TNBC | UPID12 |
| FOLH1B | Missense | chr11:89403566 | p.K35R | A>G | NM_153696 | TNBC | UPID12 |
| CD163L1 | Missense | chr12:7519859 | p.E1428Q | C>G | NM_001297650 | TNBC | UPID12 |
| WARS1 | Missense | chr14:100826970 | p.E74Q | C>G | NM_213645 | TNBC | UPID12 |
| PPP2R5C | Frameshift | chr14:102276303 | p.R10Pfs*37 | delCAGCAGGATGGTGGTGGATGCGGCCAACTCCAATGGGCCTTTC | NM_001352912 | TNBC | UPID12 |
| PDE8A | Missense | chr15:85669562 | p.C691Y | G>A | NM_173454 | TNBC | UPID12 |
| PARN | Missense | chr16:14698007 | p.E214G | T>C | NM_001242992 | TNBC | UPID12 |
| ADAD2 | Missense | chr16:84229939 | p.E497K | G>A | NM_001145400 | TNBC | UPID12 |
| ZNF276 | Nonsense | chr16:89800353 | p.E461* | G>T | NM_001113525 | TNBC | UPID12 |
| CORO6 | Frameshift | chr17:27945863 | p.S180Tfs*28 | delGTGGTGGCTAGCAGGCTACCGTTGCTGTTCCAGCACACAC | NM_032854 | TNBC | UPID12 |
| ACBD4 | Missense | chr17:43215094 | p.L170F | C>T | NM_001135706 | TNBC | UPID12 |
| ABCA5 | Missense | chr17:67251879 | p.K1324I | T>A | NM_018672 | TNBC | UPID12 |
| DSC1 | Missense | chr18:28711573 | p.Q824R | T>C | NM_004948 | TNBC | UPID12 |
| POLI | Missense | chr18:51820763 | p.P596S | C>T | NM_001351616 | TNBC | UPID12 |
| EPB41L3 | Missense | chr18:5423455 | p.A421S | C>A | NM_001281533 | TNBC | UPID12 |
| SLC66A2 | Missense | chr18:77710920 | p.A3S | C>A | NM_001146343 | TNBC | UPID12 |
| ZNF91 | Missense | chr19:23544920 | p.I255M | T>C | NM_001300951 | TNBC | UPID12 |
| ETV2 | Missense | chr19:36134431 | p.T71I | C>T | NM_001300974 | TNBC | UPID12 |
| PAK4 | Missense | chr19:39669122 | p.R407Q | G>A | NM_001014834 | TNBC | UPID12 |
| CLEC11A | Missense | chr19:51228591 | p.P280Q | C>A | NM_002975 | TNBC | UPID12 |
| SCTR | Frameshift | chr2:120206308 | p.S324fs | insT | NM_002980 | TNBC | UPID12 |
| MROH2A | Missense | chr2:234738282 | p.R1490P | G>C | NM_001367507 | TNBC | UPID12 |
| ATAD2B | Missense | chr2:24086405 | p.P442L | G>A | NM_001242338 | TNBC | UPID12 |
| CEBPZ | Missense | chr2:37455513 | p.K275Q | T>G | NM_005760 | TNBC | UPID12 |
| EML6 | Missense | chr2:55177898 | p.V1399L | G>C | NM_001039753 | TNBC | UPID12 |
| GGCX | Missense | chr2:85778676 | p.L499P | A>G | NM_001142269 | TNBC | UPID12 |
| KRTAP13-4 | Missense | chr21:31803000 | p.Y136F | A>T | NM_181600 | TNBC | UPID12 |
| SLC51A | Missense | chr3:195955006 | p.Y128C | A>G | NM_152672 | TNBC | UPID12 |
| ZNF502 | Missense | chr3:44763781 | p.Y491C | A>G | NM_001134441 | TNBC | UPID12 |
| PCBP4 | Missense | chr3:51992205 | p.P319A | G>C | NM_020418 | TNBC | UPID12 |
| C4orf54 | Missense | chr4:100572655 | p.G1051W | G>A | NM_001354435 | TNBC | UPID12 |
| COL25A1 | Missense | chr4:109748320 | p.P591T | G>T | NM_001256074 | TNBC | UPID12 |
| ATP8A1 | Missense | chr4:42658887 | p.P2S | G>A | NM_001105529 | TNBC | UPID12 |
| H1-1 | Missense | chr6:26017347 | p.G205V | G>A | NM_005325 | TNBC | UPID12 |
| PPP1R3G | Missense | chr6:5086452 | p.P245S | C>T | NM_001145115 | TNBC | UPID12 |
| IBTK | Missense | chr6:82935297 | p.T241N | G>T | NM_001300906 | TNBC | UPID12 |
| DGKI | Missense | chr7:137082130 | p.S661G | T>C | NM_001321710 | TNBC | UPID12 |
| RAB11FIP1 | Missense | chr8:37756842 | p.D40Y | C>A | NM_001002814 | TNBC | UPID12 |
| ZFHX4 | Missense | chr8:77619937 | p.S916I | G>T | NM_024721 | TNBC | UPID12 |
| MAN1B1 | Missense | chr9:140002930 | p.E663Q | G>C | NM_016219 | TNBC | UPID12 |
| PTPDC1 | Missense | chr9:96860371 | p.S508C | C>G | NM_001253829 | TNBC | UPID12 |
| CUL4B | Frameshift | chrX:119691872 | p.P13Lfs*4 | delGTTTTCTG | NM_001369145 | TNBC | UPID12 |
| MAGEA6 | Missense | chrX:151869528 | p.T73I | C>T | NM_005363 | TNBC | UPID12 |
| MECP2 | Missense | chrX:153296049 | p.S422R | G>C | NM_001110792 | TNBC | UPID12 |
| POLA1 | Missense | chrX:24948627 | p.E1408K | G>A | NM_001330360 | TNBC | UPID12 |
| GDPD2 | Missense | chrX:69652429 | p.T407S | A>T | NM_001171191 | TNBC | UPID12 |
| SPEN | Frameshift | chr1:16257160 | p.N1476Rfs*2 | delAAACAACA | NM_015001 | TNBC | UPID13 |
| EPHA2 | Missense | chr1:16462214 | p.S401F | G>A | NM_001329090 | TNBC | UPID13 |
| PAPPA2 | Frameshift | chr1:176525733 | p.G93Rfs*8 | insA | NM_020318 | TNBC | UPID13 |
| ZP4 | Missense | chr1:238048144 | p.H439N | G>T | NM_021186 | TNBC | UPID13 |
| HIVEP3 | Missense | chr1:42045559 | p.P1637H | G>T | NM_001127714 | TNBC | UPID13 |
| MIGA1 | Missense | chr1:78245371 | p.S11C | A>T | NM_001270384 | TNBC | UPID13 |
| PITRM1 | Nonsense | chr10:3187874 | p.Q693* | G>A | NM_001242309 | TNBC | UPID13 |
| TMEM25 | Missense | chr11:118406297 | p.S598A | G>A | NM_017696 | TNBC | UPID13 |
| PTPN5 | Missense | chr11:18762202 | p.E264V | T>A | NM_001278238 | TNBC | UPID13 |
| OR51A2 | Missense | chr11:4976526 | p.T140A | T>C | NM_001004748 | TNBC | UPID13 |
| MS4A6A | Missense | chr11:59949079 | p.L69P | A>G | NM_001330275 | TNBC | UPID13 |
| TAOK3 | Missense | chr12:118673391 | p.A175T | C>T | NM_001346487 | TNBC | UPID13 |
| ALG10B | Missense | chr12:38710753 | p.S20A | T>G | NM_001013620 | TNBC | UPID13 |
| TRHDE | Missense | chr12:72667266 | p.G367R | C>T | NM_001318755 | TNBC | UPID13 |
| CFAP54 | Missense | chr12:97078467 | p.A1920T | G>A | NM_001306084 | TNBC | UPID13 |
| LRRC63 | Missense | chr13:46802833 | p.S266N | G>A | NM_001282460 | TNBC | UPID13 |
| XRCC3 | Missense | chr14:104165163 | p.R338Q | C>T | NM_001100118 | TNBC | UPID13 |
| UNC13C | Missense | chr15:54916142 | p.T2115S | A>T | NM_001329919 | TNBC | UPID13 |
| HEXA | Missense | chr15:72641433 | p.D325Y | C>A | NM_000520 | TNBC | UPID13 |
| NPIPB11 | Missense | chr16:29393512 | p.S914L | G>A | NM_001310137 | TNBC | UPID13 |
| COTL1 | Missense | chr16:84651152 | p.G39S | C>T | NM_021149 | TNBC | UPID13 |
| UNC45B | Missense | chr17:33507667 | p.C703Y | G>A | NM_001308281 | TNBC | UPID13 |
| ABCC3 | Missense | chr17:48738345 | p.A290T | G>A | NM_001144070 | TNBC | UPID13 |
| MAST1 | Missense | chr19:12981896 | p.S1058F | C>T | NM_014975 | TNBC | UPID13 |
| GPATCH1 | Missense | chr19:33609997 | p.P832R | C>G | NM_018025 | TNBC | UPID13 |
| EPS8L1 | Missense | chr19:55598766 | p.V556A | T>C | NM_017729 | TNBC | UPID13 |
| PRSS57 | Missense | chr19:694905 | p.A48T | C>T | NM_001308209 | TNBC | UPID13 |
| DYNC2LI1 | Missense | chr2:44028847 | p.I268M | A>G | NM_001193464 | TNBC | UPID13 |
| IFNAR2 | Missense | chr21:34632995 | p.G268A | G>C | NM_000874 | TNBC | UPID13 |
| RUNX1 | Splice site | chr21:36171760 | c.725-1G>A | C>T | NM_001001890 | TNBC | UPID13 |
| B3GALT5 | Missense | chr21:41033285 | p.F267L | T>C | NM_001278650 | TNBC | UPID13 |
| TSPO | Missense | chr22:43555267 | p.A8V | C>T | NM_000714 | TNBC | UPID13 |
| SHISAL1 | Missense | chr22:44681510 | p.A133S | C>A | NM_001099294 | TNBC | UPID13 |
| PLXNA1 | Missense | chr3:126723472 | p.E513Q | G>C | NM_032242 | TNBC | UPID13 |
| ANK2 | Missense | chr4:114257151 | p.P353T | C>A | NM_001354278 | TNBC | UPID13 |
| HOPX | Splice site | chr4:57522180 | c.43-2A>C | T>G | NM_001145460 | TNBC | UPID13 |
| RICTOR | Missense | chr5:38958796 | p.D772E | A>C | NM_001285439 | TNBC | UPID13 |
| MCM9 | Missense | chr6:119147968 | p.Q133L | A>C | NM_001098833 | TNBC | UPID13 |
| SLC26A8 | Missense | chr6:35959578 | p.I267T | A>G | NM_001193476 | TNBC | UPID13 |
| NFYA | Nonsense | chr6:41062195 | p.R288* | C>T | NM_021705 | TNBC | UPID13 |
| TBX18 | Missense | chr6:85466573 | p.S205I | C>A | NM_001080508 | TNBC | UPID13 |
| CPED1 | Missense | chr7:120911399 | p.G928D | G>A | NM_024913 | TNBC | UPID13 |
| RSPO2 | Missense | chr8:108913355 | p.R163K | C>T | NM_001282863 | TNBC | UPID13 |
| GRINA | Missense | chr8:145065462 | p.G24E | G>A | NM_000837 | TNBC | UPID13 |
| SH2D3C | Missense | chr9:130529351 | p.S47F | G>A | NM_001252334 | TNBC | UPID13 |
| SAGE1 | Missense | chrX:134988612 | p.N213I | A>T | NM_018666 | TNBC | UPID13 |
| PDE4DIP | Missense | chr1:144882817 | p.S1231P | A>G | NM_001350520 | TNBC | UPID14 |
| FLG | Missense | chr1:152275721 | p.E3881Q | C>G | NM_002016 | TNBC | UPID14 |
| PEAR1 | Missense | chr1:156884512 | p.N948K | C>G | NM_001353682 | TNBC | UPID14 |
| CD5L | Missense | chr1:157804512 | p.P135A | G>C | NM_001347698 | TNBC | UPID14 |
| CD1B | Missense | chr1:158299424 | p.W208R | A>G | NM_001764 | TNBC | UPID14 |
| CASQ1 | Missense | chr1:160164815 | p.P160R | C>G | NM_001231 | TNBC | UPID14 |
| MPZ | Missense | chr1:161275694 | p.L240P | A>G | NM_000530 | TNBC | UPID14 |
| EPHA2 | Missense | chr1:16475460 | p.N25S | T>C | NM_001329090 | TNBC | UPID14 |
| PRRX1 | Frameshift | chr1:170705258 | p.I224Sfs*17 | insAGCCGAGGTCAGGGCT | NM_022716 | TNBC | UPID14 |
| TOR1AIP2 | Missense | chr1:179815538 | p.A361P | C>G | NM_001349936 | TNBC | UPID14 |
| PLA2G2C | Missense | chr1:20499296 | p.P90S | C>A | NM_001316722 | TNBC | UPID14 |
| DISP1 | Missense | chr1:223178852 | p.K1371N | G>T | NM_001369594 | TNBC | UPID14 |
| CAPN8 | Missense | chr1:223806997 | p.P378Q | G>T | NM_001143962 | TNBC | UPID14 |
| RAB4A | Missense | chr1:229438648 | p.Y89S | A>C | NM_001271998 | TNBC | UPID14 |
| ZDHHC18 | Missense | chr1:27179299 | p.S331I | G>T | NM_032283 | TNBC | UPID14 |
| MROH7 | Missense | chr1:55139765 | p.I144T | T>C | NM_001291332 | TNBC | UPID14 |
| PGM1 | Missense | chr1:64120097 | p.S538I | G>T | NM_001172818 | TNBC | UPID14 |
| CAMTA1 | Missense | chr1:7798312 | p.V361I | G>A | NM_001349613 | TNBC | UPID14 |
| PSD | Missense | chr10:104173544 | p.G512E | C>T | NM_002779 | TNBC | UPID14 |
| CYP2E1 | Missense | chr10:135341994 | p.R63C | C>T | NM_000773 | TNBC | UPID14 |
| ABI1 | Frameshift | chr10:27044645 | p.M337Cfs*4 | delA | NM_001012752 | TNBC | UPID14 |
| APOA5 | Missense | chr11:116662537 | p.L14I | G>T | NM_001371904 | TNBC | UPID14 |
| CEP164 | Missense | chr11:117214987 | p.K63T | A>C | NM_001271933 | TNBC | UPID14 |
| BSX | Missense | chr11:122852292 | p.P30A | G>C | NM_001098169 | TNBC | UPID14 |
| SIAE | Missense | chr11:124524646 | p.Q150R | T>C | NM_170601 | TNBC | UPID14 |
| PTPN5 | Missense | chr11:18759472 | p.I295V | T>C | NM_001278238 | TNBC | UPID14 |
| KIAA1549L | Missense | chr11:33604952 | p.T1491A | A>G | NM_012194 | TNBC | UPID14 |
| TRIM48 | Missense | chr11:55032617 | p.A96S | G>T | NM_024114 | TNBC | UPID14 |
| BBS1 | Nonsense | chr11:66298475 | p.Y528* | T>G | NM_024649 | TNBC | UPID14 |
| TBX5 | Missense | chr12:114804004 | p.E266D | C>A | NM_080717 | TNBC | UPID14 |
| OR8S1 | Missense | chr12:48921822 | p.T339M | C>T | NM_001005203 | TNBC | UPID14 |
| ZDHHC17 | Missense | chr12:77191265 | p.R39G | C>G | NM_001359626 | TNBC | UPID14 |
| GDF3 | Missense | chr12:7842592 | p.Q326L | T>A | NM_020634 | TNBC | UPID14 |
| SLC25A3 | Missense | chr12:98987790 | p.N12H | A>C | NM_213611 | TNBC | UPID14 |
| SPATA13 | Frameshift | chr13:24874603 | p.K452Vfs*100 | delAA | NM_001286793 | TNBC | UPID14 |
| ATP12A | Missense | chr13:25264536 | p.G203W | G>T | NM_001185085 | TNBC | UPID14 |
| SLC7A8 | Missense | chr14:23612372 | p.T79P | T>G | NM_001267036 | TNBC | UPID14 |
| JPH4 | Missense | chr14:24040427 | p.Q505E | G>C | NM_001146028 | TNBC | UPID14 |
| BAZ1A | Missense | chr14:35295351 | p.R135M | C>A | NM_013448 | TNBC | UPID14 |
| PSEN1 | Missense | chr14:73640356 | p.S141G | A>G | NM_000021 | TNBC | UPID14 |
| ATG2B | Missense | chr14:96809616 | p.T195I | G>A | NM_018036 | TNBC | UPID14 |
| NDN | Missense | chr15:23932144 | p.A74V | G>A | NM_002487 | TNBC | UPID14 |
| HERC2 | Missense | chr15:28513743 | p.G489V | C>A | NM_004667 | TNBC | UPID14 |
| EIF2AK4 | Missense | chr15:40300241 | p.R1141S | C>A | NM_001013703 | TNBC | UPID14 |
| SPTBN5 | Missense | chr15:42165736 | p.Y1654C | T>C | NM_016642 | TNBC | UPID14 |
| FRMD5 | Missense | chr15:44166406 | p.A429T | C>T | NM_001322951 | TNBC | UPID14 |
| MYO5C | Missense | chr15:52488511 | p.V1664L | C>G | NM_018728 | TNBC | UPID14 |
| SIN3A | Missense | chr15:75694286 | p.E478G | T>C | NM_001145357 | TNBC | UPID14 |
| UBE2Q2 | Missense | chr15:76136719 | p.E9Q | G>C | NM_001145335 | TNBC | UPID14 |
| TBC1D2B | Frameshift | chr15:78317589 | p.K362Sfs*64 | delAGAAGAAGTTACCTTC | NM_015079 | TNBC | UPID14 |
| BLM | Frameshift | chr15:91304034 | p.G478Dfs*24 | delA | NM_000057 | TNBC | UPID14 |
| BAIAP3 | Missense | chr16:1398105 | p.P1017H | C>A | NM_001199096 | TNBC | UPID14 |
| MYLK3 | Missense | chr16:46781682 | p.M142L | T>A | NM_182493 | TNBC | UPID14 |
| ROGDI | Missense | chr16:4848086 | p.P211S | G>A | NM_024589 | TNBC | UPID14 |
| DRC7 | Missense | chr16:57756691 | p.W384L | G>T | NM_001289163 | TNBC | UPID14 |
| SMYD4 | Missense | chr17:1703471 | p.E406G | T>C | NM_052928 | TNBC | UPID14 |
| UTP6 | Missense | chr17:30226707 | p.Q45H | C>G | NM_018428 | TNBC | UPID14 |
| KIF18B | Nonsense | chr17:43006208 | p.Q580* | G>A | NM_001264573 | TNBC | UPID14 |
| ARHGAP27 | Nonsense | chr17:43507579 | p.G23* | C>A | NM_174919 | TNBC | UPID14 |
| NLRP1 | Missense | chr17:5463291 | p.P242Q | G>T | NM_001033053 | TNBC | UPID14 |
| ST6GALNAC2 | Missense | chr17:74570465 | p.R115W | G>A | NM_006456 | TNBC | UPID14 |
| CTC1 | Missense | chr17:8151339 | p.A6T | C>T | NM_025099 | TNBC | UPID14 |
| AFG3L2 | Missense | chr18:12344236 | p.K558N | C>A | NM_006796 | TNBC | UPID14 |
| RPL17-C18orf32 | Nonsense | chr18:47010115 | p.W140* | C>T | NM_001199356 | TNBC | UPID14 |
| KIR2DS1 | Missense | chr19:115133 | p.M8V | A>G | NM_014512 | TNBC | UPID14 |
| KIR2DS1 | Missense | chr19:118854 | p.L111V | T>G | NM_014512 | TNBC | UPID14 |
| TRMT1 | Frameshift | chr19:13226975 | p.F80Sfs*5 | delA | NM_001142554 | TNBC | UPID14 |
| PTGER1 | Missense | chr19:14583560 | p.S341P | A>G | NM_000955 | TNBC | UPID14 |
| ATP8B3 | Missense | chr19:1806652 | p.P165S | G>A | NM_001178002 | TNBC | UPID14 |
| ZNF99 | Missense | chr19:22940663 | p.G683D | C>T | NM_001080409 | TNBC | UPID14 |
| ATP4A | Splice site | chr19:36049478 | c.1365+1Gdel | delC | NM_000704 | TNBC | UPID14 |
| FCGBP | Missense | chr19:40370509 | p.R4053G | G>C | NM_003890 | TNBC | UPID14 |
| DBP | Missense | chr19:49139163 | p.D75V | T>A | NM_001352 | TNBC | UPID14 |
| ZNF473 | Missense | chr19:50548866 | p.L377R | T>G | NM_001308424 | TNBC | UPID14 |
| CLEC11A | Missense | chr19:51227722 | p.H130Q | C>G | NM_002975 | TNBC | UPID14 |
| NLRP2 | Nonsense | chr19:55493994 | p.K288* | A>T | NM_001174082 | TNBC | UPID14 |
| U2AF2 | Missense | chr19:56185420 | p.R468W | C>T | NM_001012478 | TNBC | UPID14 |
| ZNF583 | Frameshift | chr19:56934717 | p.Q231Rfs*81 | delT | NM_001159860 | TNBC | UPID14 |
| ZNF835 | Missense | chr19:57176308 | p.G87R | C>T | NM_001005850 | TNBC | UPID14 |
| ZRANB3 | Missense | chr2:136073018 | p.I254V | T>C | NM_001286568 | TNBC | UPID14 |
| LRP1B | Nonsense | chr2:141625286 | p.W1484* | C>T | NM_018557 | TNBC | UPID14 |
| TTN | Nonsense | chr2:179569237 | p.E9988* | C>A | NM_133378 | TNBC | UPID14 |
| CASP8 | Missense | chr2:202139625 | p.C188W | T>G | NM_033356 | TNBC | UPID14 |
| TRAK2 | Missense | chr2:202254101 | p.K440R | T>C | NM_015049 | TNBC | UPID14 |
| AGFG1 | Splice site | chr2:228401338 | c.1278-1_1279del | delCAG | NM_001135187 | TNBC | UPID14 |
| SP100 | Missense | chr2:231328826 | p.G343S | G>A | NM_001206703 | TNBC | UPID14 |
| HNRNPLL | Missense | chr2:38811014 | p.F201L | A>G | NM_138394 | TNBC | UPID14 |
| SNPH | Missense | chr20:1286529 | p.T439R | C>G | NM_014723 | TNBC | UPID14 |
| SPTLC3 | Missense | chr20:13098193 | p.L325I | C>A | NM_018327 | TNBC | UPID14 |
| SIRPB2 | Missense | chr20:1460572 | p.K75R | T>C | NM_001122962 | TNBC | UPID14 |
| TTLL9 | Nonsense | chr20:30507687 | p.I177* | delAGGCATCTTCCTCTTCCGT | NM_001008409 | TNBC | UPID14 |
| C20orf194 | Splice site | chr20:3285086 | c.1782+1G>C | C>G | NM_001009984 | TNBC | UPID14 |
| COL20A1 | Missense | chr20:61938946 | p.F201V | T>G | NM_020882 | TNBC | UPID14 |
| DSCAM | Missense | chr21:41450841 | p.N1495S | T>C | NM_001271534 | TNBC | UPID14 |
| SLC19A1 | Missense | chr21:46935009 | p.A451T | C>T | NM_001205206 | TNBC | UPID14 |
| CACNG2 | Missense | chr22:36960499 | p.D291Y | C>A | NM_006078 | TNBC | UPID14 |
| GRAMD4 | Missense | chr22:47064730 | p.K363Q | A>C | NM_001366660 | TNBC | UPID14 |
| MAPK8IP2 | Missense | chr22:51044094 | p.Thr648K | C>A | NM_012324 | TNBC | UPID14 |
| ZBTB11 | Missense | chr3:101378698 | p.T659S | T>A | NM_014415 | TNBC | UPID14 |
| ARHGAP31 | Missense | chr3:119133420 | p.V882L | G>T | NM_020754 | TNBC | UPID14 |
| MBNL1 | Missense | chr3:152132863 | p.A103G | C>G | NM_001363870 | TNBC | UPID14 |
| MELTF | Missense | chr3:196736602 | p.R471P | C>G | NM_005929 | TNBC | UPID14 |
| ANKRD50 | Missense | chr4:125631224 | p.R148K | C>T | NM_020337 | TNBC | UPID14 |
| FAT1 | Missense | chr4:187549847 | p.I1465T | A>G | NM_005245 | TNBC | UPID14 |
| DOK7 | Missense | chr4:3495109 | p.L156V | C>G | NM_001256896 | TNBC | UPID14 |
| CSF1R | Frameshift | chr5:149452936 | p.W336Sfs*35 | delGTCC | NM_005211 | TNBC | UPID14 |
| CSF1R | Frameshift | chr5:149452941 | p.P329Gfs*36 | delGTTAAAACCTTGCAGGCCTGGG | NM_005211 | TNBC | UPID14 |
| MAST4 | Missense | chr5:66459563 | p.G1258D | G>A | NM_001290227 | TNBC | UPID14 |
| CRYBG1 | Missense | chr6:107006433 | p.E1522Q | G>C | NM_001624 | TNBC | UPID14 |
| NEDD9 | Missense | chr6:11191097 | p.K186N | T>A | NM_001271033 | TNBC | UPID14 |
| KPNA5 | Missense | chr6:117046984 | p.K357R | A>G | NM_001366306 | TNBC | UPID14 |
| VNN3 | Missense | chr6:133044976 | p.T133S | G>C | NM_001368156 | TNBC | UPID14 |
| FNDC1 | Missense | chr6:159618625 | p.A91G | C>G | NM_032532 | TNBC | UPID14 |
| H2AC17 | Missense | chr6:27860749 | p.T60S | G>C | NM_003514 | TNBC | UPID14 |
| FAM217A | Missense | chr6:4069478 | p.T327S | T>A | NM_173563 | TNBC | UPID14 |
| MEP1A | Missense | chr6:46800871 | p.R402P | G>C | NM_005588 | TNBC | UPID14 |
| ANKRD6 | Missense | chr6:90340337 | p.M536V | A>G | NM_001242814 | TNBC | UPID14 |
| ZNHIT1 | Missense | chr7:100866833 | p.E90V | A>T | NM_006349 | TNBC | UPID14 |
| NUP205 | Missense | chr7:135298932 | p.S716F | C>T | NM_001329434 | TNBC | UPID14 |
| STK31 | Splice site | chr7:23854762 | c.2692-1G>A | G>A | NM_001260504 | TNBC | UPID14 |
| TNRC18 | Missense | chr7:5385378 | p.G1845A | C>G | NM_001080495 | TNBC | UPID14 |
| TNRC18 | Missense | chr7:5410726 | p.E1167K | C>T | NM_001080495 | TNBC | UPID14 |
| TNRC18 | Missense | chr7:5415837 | p.A876V | G>A | NM_001080495 | TNBC | UPID14 |
| ZNF716 | Missense | chr7:57522194 | p.I23K | T>A | NM_001159279 | TNBC | UPID14 |
| ABCB4 | Missense | chr7:87035714 | p.I1079F | T>A | NM_018850 | TNBC | UPID14 |
| TMEM65 | Nonsense | chr8:125334353 | p.G170* | C>A | NM_194291 | TNBC | UPID14 |
| STMN2 | Missense | chr8:80567263 | p.N149T | A>C | NM_001199214 | TNBC | UPID14 |
| OR13C3 | Missense | chr9:107298902 | p.Y65D | A>C | NM_001001961 | TNBC | UPID14 |
| CEMIP2 | Missense | chr9:74360361 | p.T203A | T>C | NM_001135820 | TNBC | UPID14 |
| PRUNE2 | Splice site | chr9:79326275 | c.916-1G>T | C>A | NM_001308047 | TNBC | UPID14 |
| AMOT | Missense | chrX:112022354 | p.V1010M | C>T | NM_001113490 | TNBC | UPID14 |
| TEX13C | Missense | chrX:124455539 | p.H524R | A>G | NM_001195272 | TNBC | UPID14 |
| HPRT1 | Missense | chrX:133627556 | p.K141Q | A>C | NM_000194 | TNBC | UPID14 |
| RBM10 | Missense | chrX:47028806 | p.R37Q | G>A | NM_001204466 | TNBC | UPID14 |
| HDAC6 | Missense | chrX:48664833 | p.V166F | G>T | NM_001321226 | TNBC | UPID14 |
| MAGEH1 | Missense | chrX:55478929 | p.A41G | C>G | NM_014061 | TNBC | UPID14 |
| RRAGB | Frameshift | chrX:55744766 | p.S4Nfs*40 | delAGAATCTGACTCTG | NM_006064 | TNBC | UPID14 |
| EDA | Missense | chrX:69176932 | p.S151I | G>T | NM_001005609 | TNBC | UPID14 |
| OGT | Splice site | chrX:70782979 | c.2149-1insA | insA | NM_181672 | TNBC | UPID14 |
| TCHHL1 | Nonsense | chr1:152059068 | p.E364* | C>A | NM_001008536 | TNBC | UPID15 |
| HRNR | Missense | chr1:152190957 | p.G1050S | A>T | NM_001009931 | TNBC | UPID15 |
| DENND4B | Missense | chr1:153910055 | p.F725S | A>G | NM_001367466 | TNBC | UPID15 |
| CD1D | Missense | chr1:158152935 | p.V188A | T>C | NM_001371761 | TNBC | UPID15 |
| NIT1 | Missense | chr1:161089972 | p.L208I | C>A | NM_001185093 | TNBC | UPID15 |
| NBPF1 | Frameshift | chr1:16892166 | p.S988Wfs*56 | delAATGCATAAAAGG | NM_017940 | TNBC | UPID15 |
| IGSF21 | Missense | chr1:18691786 | p.G204R | G>C | NM_032880 | TNBC | UPID15 |
| PRKCZ | Missense | chr1:2116091 | p.D366Y | G>T | NM_001033581 | TNBC | UPID15 |
| TRIM67 | Nonsense | chr1:231349616 | p.K727* | A>T | NM_001004342 | TNBC | UPID15 |
| HEATR1 | Missense | chr1:236732358 | p.D1339Y | C>A | NM_018072 | TNBC | UPID15 |
| ZNF683 | Missense | chr1:26688632 | p.S393I | C>A | NM_001307925 | TNBC | UPID15 |
| PTCH2 | Missense | chr1:45293116 | p.A777T | C>T | NM_001166292 | TNBC | UPID15 |
| MALRD1 | Missense | chr10:19493882 | p.N756D | A>G | NM_001142308 | TNBC | UPID15 |
| ANKRD30A | Missense | chr10:37451718 | p.M592I | G>A | NM_052997 | TNBC | UPID15 |
| AASDHPPT | Missense | chr11:105948477 | p.M14V | A>G | NM_015423 | TNBC | UPID15 |
| FXYD6 | Frameshift | chr11:117711046 | p.Q78Hfs*26 | delTGAGGTTCTCCACC | NM_001164831 | TNBC | UPID15 |
| MOB2 | Missense | chr11:1492615 | p.V134F | C>A | NM_001172223 | TNBC | UPID15 |
| ALX4 | Missense | chr11:44331290 | p.Q108R | T>C | NM_021926 | TNBC | UPID15 |
| PRDM11 | Missense | chr11:45248621 | p.E815D | G>T | NM_001256695 | TNBC | UPID15 |
| P2RX3 | Missense | chr11:57114602 | p.F90L | T>C | NM_002559 | TNBC | UPID15 |
| OR52E8 | Nonsense | chr11:5878930 | p.M1? | C>T | NM_001005168 | TNBC | UPID15 |
| OR10V1 | Missense | chr11:59480733 | p.H196Y | G>A | NM_001005324 | TNBC | UPID15 |
| SCGB2A1 | Missense | chr11:61977999 | p.E57G | A>G | NM_002407 | TNBC | UPID15 |
| OR2AT4 | Missense | chr11:74800616 | p.A48V | G>A | NM_001005285 | TNBC | UPID15 |
| KCTD21 | Missense | chr11:77885270 | p.M111V | T>C | NM_001029859 | TNBC | UPID15 |
| CTSC | Frameshift | chr11:88027412 | p.K385Rfs*9 | delT | NM_001814 | TNBC | UPID15 |
| HCFC2 | Frameshift | chr12:104473194 | p.Y159Wfs*13 | delATGTTTTAATTTTTTCTATGATATCCTAGATATTTAAATGATTTTTATGAGTTGGAGCTACAGC | NM_013320 | TNBC | UPID15 |
| LHX5 | Missense | chr12:113905115 | p.G263C | C>A | NM_022363 | TNBC | UPID15 |
| ANKLE2 | Missense | chr12:133313529 | p.D515Y | C>A | NM_015114 | TNBC | UPID15 |
| AAAS | Nonsense | chr12:53708191 | p.R161* | G>A | NM_001173466 | TNBC | UPID15 |
| MYO1A | Missense | chr12:57442103 | p.P2R | G>C | NM_005379 | TNBC | UPID15 |
| LRRIQ1 | Frameshift | chr12:85450702 | p.I711Mfs*3 | delATTTCAGAAAA | NM_001079910 | TNBC | UPID15 |
| CCDC168 | Missense | chr13:103400603 | p.R815H | C>T | NM_001146197 | TNBC | UPID15 |
| MYCBP2 | Missense | chr13:77785386 | p.S1111N | C>T | NM_015057 | TNBC | UPID15 |
| CDC42BPB | Missense | chr14:103430983 | p.P861L | G>A | NM_006035 | TNBC | UPID15 |
| BAG5 | Nonsense | chr14:104027318 | p.G62* | C>A | NM_001015048 | TNBC | UPID15 |
| NUBPL | Missense | chr14:32031361 | p.V66I | G>A | NM_025152 | TNBC | UPID15 |
| CLEC14A | Missense | chr14:38724648 | p.A194T | C>T | NM_175060 | TNBC | UPID15 |
| C14orf39 | Missense | chr14:60903583 | p.T582A | T>C | NM_174978 | TNBC | UPID15 |
| DCAF5 | Missense | chr14:69522100 | p.D434Y | C>A | NM_001284206 | TNBC | UPID15 |
| SLC8A3 | Missense | chr14:70527645 | p.R599K | C>T | NM_058240 | TNBC | UPID15 |
| FLVCR2 | Missense | chr14:76071966 | p.E18G | A>G | NM_001195283 | TNBC | UPID15 |
| NPAP1 | Missense | chr15:24921303 | p.T97S | A>T | NM_018958 | TNBC | UPID15 |
| TJP1 | Missense | chr15:30058522 | p.S183N | C>T | NM_001355013 | TNBC | UPID15 |
| DUOX2 | Missense | chr15:45405599 | p.A4V | G>A | NM_001363711 | TNBC | UPID15 |
| C15orf39 | Missense | chr15:75500646 | p.P753A | C>G | NM_015492 | TNBC | UPID15 |
| NOMO1 | Missense | chr16:14983031 | p.V1135L | G>T | NM_014287 | TNBC | UPID15 |
| MYLPF | Missense | chr16:30387489 | p.N40K | C>A | NM_013292 | TNBC | UPID15 |
| ARMC5 | Missense | chr16:31476464 | p.R707K | G>A | NM_024742 | TNBC | UPID15 |
| SALL1 | Missense | chr16:51173239 | p.V868G | A>C | NM_001127892 | TNBC | UPID15 |
| CAPN15 | Missense | chr16:601663 | p.R782W | A>T | NM_005632 | TNBC | UPID15 |
| TPPP3 | Missense | chr16:67424094 | p.A172T | C>T | NM_015964 | TNBC | UPID15 |
| HSD11B2 | Missense | chr16:67470644 | p.T319N | C>A | NM_000196 | TNBC | UPID15 |
| PMM2 | Missense | chr16:8906907 | p.H195D | C>G | NM_000303 | TNBC | UPID15 |
| MED1 | Missense | chr17:37563739 | p.I1579V | T>C | NM_004774 | TNBC | UPID15 |
| TOP2A | Missense | chr17:38551746 | p.E1256K | C>T | NM_001067 | TNBC | UPID15 |
| NMT1 | Missense | chr17:43175881 | p.T282S | C>G | NM_021079 | TNBC | UPID15 |
| ASGR2 | Splice site | chr17:7010472 | c.497-2A>G | T>C | NM_001201352 | TNBC | UPID15 |
| DCXR | Missense | chr17:79994510 | p.R118G | T>C | NM_001195218 | TNBC | UPID15 |
| LAMA3 | Missense | chr18:21394415 | p.C613S | T>A | NM_001127717 | TNBC | UPID15 |
| FXYD5 | Missense | chr19:35657313 | p.A191G | C>G | NM_001320912 | TNBC | UPID15 |
| KIRREL2 | Frameshift | chr19:36350393 | p.K128Tfs*3 | delAGGAAGGGACCCCTGGGTCAGTGGAGAG | NM_001329530 | TNBC | UPID15 |
| PSG8 | Missense | chr19:43268127 | p.I124T | A>G | NM_001130167 | TNBC | UPID15 |
| NUCB1 | Missense | chr19:49422529 | p.G330R | G>A | NM_006184 | TNBC | UPID15 |
| NOL10 | Frameshift | chr2:10784494 | p.G299Afs*6 | delCATGCCTAAAAATAAATACAATGAAAAAGGT | NM_001261392 | TNBC | UPID15 |
| EPB41L5 | Missense | chr2:120776767 | p.A36G | C>G | NM_001184937 | TNBC | UPID15 |
| FSIP2 | Missense | chr2:186618569 | p.A331T | G>A | NM_173651 | TNBC | UPID15 |
| ANO7 | Missense | chr2:242157200 | p.R691H | G>A | NM_001370694 | TNBC | UPID15 |
| FARP2 | Frameshift | chr2:242396326 | p.R527Dfs*13 | delC | NM_001282983 | TNBC | UPID15 |
| CLIP4 | Missense | chr2:29366676 | p.M250I | G>A | NM_001287527 | TNBC | UPID15 |
| KIF16B | Missense | chr20:16360450 | p.L733I | G>T | NM_001199865 | TNBC | UPID15 |
| RRBP1 | Splice site | chr20:17616310 | c.1039-6_1039-1del | delCTGGAA | NM_004587 | TNBC | UPID15 |
| ADRA1D | Missense | chr20:4202283 | p.R536C | G>A | NM_000678 | TNBC | UPID15 |
| SAMSN1 | Missense | chr21:15858244 | p.P371S | G>A | NM_022136 | TNBC | UPID15 |
| SETD4 | Missense | chr21:37410555 | p.V361L | C>A | NM_017438 | TNBC | UPID15 |
| PCNT | Missense | chr21:47847659 | p.G2364R | G>A | NM_001315529 | TNBC | UPID15 |
| FBXO7 | Frameshift | chr22:32887093 | p.Y219Sfs*14 | delTACAAAGATCTTCAGAAACTCTCTCGCCTCTTTAAAGACC | NM_001033024 | TNBC | UPID15 |
| MIEF1 | Missense | chr22:39908285 | p.V124E | T>A | NM_001304564 | TNBC | UPID15 |
| PPP2R3A | Missense | chr3:135822194 | p.Q330H | G>C | NM_001190447 | TNBC | UPID15 |
| FBLN2 | Missense | chr3:13612516 | p.V221I | G>A | NM_001004019 | TNBC | UPID15 |
| KAT2B | Missense | chr3:20142879 | p.Y257S | A>C | NM_003884 | TNBC | UPID15 |
| SUMF1 | Missense | chr3:4491009 | p.D154N | C>T | NM_001164675 | TNBC | UPID15 |
| PRIMPOL | Missense | chr4:185593576 | p.K94T | A>C | NM_001345900 | TNBC | UPID15 |
| TXK | Missense | chr4:48073539 | p.H504Y | G>A | NM_003328 | TNBC | UPID15 |
| KIF4B | Missense | chr5:154394300 | p.T294I | C>T | NM_001099293 | TNBC | UPID15 |
| SKP2 | Missense | chr5:36152926 | p.T21R | C>G | NM_005983 | TNBC | UPID15 |
| BTN2A1 | Missense | chr6:26468497 | p.S374F | C>T | NM_001197233 | TNBC | UPID15 |
| IL17A | Missense | chr6:52053873 | p.R84T | G>C | NM_002190 | TNBC | UPID15 |
| KLHL32 | Missense | chr6:97578666 | p.R347G | A>G | NM_001323264 | TNBC | UPID15 |
| MUC17 | Missense | chr7:100677623 | p.S976T | T>A | NM_001040105 | TNBC | UPID15 |
| KCP | Missense | chr7:128529084 | p.Tyr781Cys | T>C | NM_001366122 | TNBC | UPID15 |
| TNPO3 | Missense | chr7:128626884 | p.C530Y | C>T | NM_012470 | TNBC | UPID15 |
| HDAC9 | Missense | chr7:18993823 | p.I954F | A>T | NM_001321877 | TNBC | UPID15 |
| HECW1 | Missense | chr7:43594344 | p.R1521Q | G>A | NM_001287059 | TNBC | UPID15 |
| TMEM71 | Missense | chr8:133740117 | p.N200K | G>C | NM_001364885 | TNBC | UPID15 |
| IDO2 | Missense | chr8:39821152 | p.P55L | C>T | NM_194294 | TNBC | UPID15 |
| ANK1 | Missense | chr8:41530334 | p.A1545V | G>A | NM_000037 | TNBC | UPID15 |
| TMEM67 | Missense | chr8:94768040 | p.M86I | G>T | NM_153704 | TNBC | UPID15 |
| NR6A1 | Missense | chr9:127300544 | p.M213I | C>A | NM_001278546 | TNBC | UPID15 |
| CCDC171 | Missense | chr9:15723701 | p.D491G | A>G | NM_001355547 | TNBC | UPID15 |
| PRKACG | Missense | chr9:71628894 | p.A39T | C>T | NM_002732 | TNBC | UPID15 |
| SPATA31D1 | Missense | chr9:84606286 | p.P301A | C>G | NM_001001670 | TNBC | UPID15 |
| DAPK1 | Missense | chr9:90317977 | p.I969L | A>C | NM_001288729 | TNBC | UPID15 |
| FRMPD4 | Missense | chrX:12734364 | p.Y556H | T>C | NM_001368400 | TNBC | UPID15 |
| TLR8 | Frameshift | chrX:12937611 | p.S152Ifs*3 | insAA | NM_138636 | TNBC | UPID15 |
| TLR8 | Frameshift | chrX:12937612 | p.L153Nfs*2 | insTCAAATTAGAGTCTAATTCA | NM_138636 | TNBC | UPID15 |
| FLNA | Frameshift | chrX:153577850 | p.Q2538Sfs*22 | delG | NM_001456 | TNBC | UPID15 |
| F8 | Missense | chrX:154185363 | p.T541P | T>G | NM_000132 | TNBC | UPID15 |
| ARSF | Missense | chrX:2998953 | p.R102K | G>A | NM_001201538 | TNBC | UPID15 |
| RP2 | Missense | chrX:46719490 | p.R279M | G>T | NM_006915 | TNBC | UPID15 |
| AKAP4 | Missense | chrX:49957202 | p.L721P | A>G | NM_003886 | TNBC | UPID15 |
| DGKK | Nonsense | chrX:50129429 | p.Cys758* | G>T | NM_001013742 | TNBC | UPID15 |
| TSPYL2 | Missense | chrX:53112159 | p.V160A | T>C | NM_022117 | TNBC | UPID15 |
| ZC4H2 | Nonsense | chrX:64137700 | p.G159* | C>A | NM_001178033 | TNBC | UPID15 |
